# Supplementary material for: Warming permafrost and active layer variability at Cime Bianche, Western European Alps
Source: Copernicus journal article supplement (doi:10.5194/tc-9-647-2015), 2015-04-08
Supplement: Supplementary file 1 [file Cime_bianche_Daten_calibration.xls]

## Sheet: Daten
Cime Bianche																		Numerische Zusammenstellung																Stump ForaTec AG
Permafrostbohrung
																																		Tel. +41 43 355 62 62
Automatische Messanlage																		Periode: 18. März 2008 - 18. März 2008																e-mail: messtechnik@stump.ch
	Logger		C64														C65																							C66		C67
Datum / Zeit	Batt	Temp	0.6m	1.0m	1.6m	2.0m	2.3m	2.6m	3.0m	3.3m	3.6m	4.0m	4.6m	5.0m	5.9m	7.0m	0.6m	1.0m	1.6m	2.0m	2.6m	3.0m	3.6m	4.0m	6.0m	8.0m	10.0m	12.0m	14.0m	15.0m	16.0m	17.0m	18.0m	20.0m	25.0m	30.0m	35.0m	40.0m	41.0m	13.0m	13.3m	41.0m	41.3m
TT.MM.JJ HH:MM	Volt	°C	°C	°C	°C	°C	°C	°C	°C	°C	°C	°C	°C	°C	°C	°C	°C	°C	°C	°C	°C	°C	°C	°C	°C	°C	°C	°C	°C	°C	°C	°C	°C	°C	°C	°C	°C	°C	°C	°C	°C	°C	°C
2008-03-18 01:38:00	12.8759	21.3135	-68.7615	-68.7615	-68.7615	-68.7615	-68.7615	-68.7615	-68.7615	-68.7615	-68.7615	-68.8033	-68.7615	-68.7615	-68.8033	-68.7615	-68.7615	-68.7615	-68.7615	-68.7615	-68.7615	-68.7615	-68.7615	-68.7615	-68.7615	-68.8033	-68.7615	-68.7615	-68.7615	-68.7615	-68.7615	-68.7615	-68.7615	-68.7615	-68.7615	-68.7615	-68.7615	-68.7615	-68.7615	-68.8033	-68.8033	-68.7615	-68.7615
2008-03-18 01:38:20	12.8759	21.3135	-68.8033	-68.8033	-68.7615	-68.7615	-68.7615	-68.8033	-68.8033	-68.8033	-68.7615	-68.7615	-68.7615	-68.7615	-68.7197	-68.7615	-68.7615	-68.7615	-68.7615	-68.8033	-68.7615	-68.7615	-68.7615	-68.8033	-68.8033	-68.7615	-68.7615	-68.7615	-68.7615	-68.7615	-68.7615	-68.7615	-68.7615	-68.8033	-68.7615	-68.7615	-68.7615	-68.7615	-68.7615	-68.8033	-68.7615	-68.8033	-68.7615
2008-03-18 01:38:40	12.8762	21.3407	-68.7197	-68.7615	-68.7197	-68.8451	-68.8033	-68.8451	-68.8451	-68.7615	-68.7615	-68.8033	-68.7197	-68.7615	-68.8033	-68.7615	-68.8033	-68.7615	-68.7615	-68.7615	-68.7615	-68.7615	-68.7615	-68.7615	-68.7615	-68.8033	-68.7615	-68.7615	-68.7615	-68.7615	-68.7615	-68.7615	-68.7615	-68.8033	-68.7615	-68.7615	-68.7615	-68.7615	-68.7615	-68.7615	-68.7615	-68.8033	-68.7615
2008-03-18 01:39:00	12.8708	21.3407	-68.7615	-68.8033	-68.8033	-68.8451	-68.7615	-68.7197	-68.8451	-68.7197	-68.8451	-68.8033	-68.8033	-68.7615	-68.7197	-68.7615	-68.7615	-68.7615	-68.7615	-68.7615	-68.7615	-68.7615	-68.7615	-68.7615	-68.7615	-68.7615	-68.7615	-68.8033	-68.7615	-68.7615	-68.7615	-68.7615	-68.7615	-68.7615	-68.7615	-68.8033	-68.8033	-68.7615	-68.7615	-68.7615	-68.7615	-68.7615	-68.7615
2008-03-18 01:39:20	12.8706	21.3678	-68.7615	-68.7197	-68.8033	-68.8451	-68.8451	-68.7615	-68.7197	-68.7615	-68.7615	-68.7615	-68.8033	-68.8033	-68.8451	-68.7615	-68.7197	-68.8033	-68.7615	-68.8033	-68.7615	-68.8033	-68.7615	-68.7615	-68.7615	-68.7615	-68.7615	-68.7615	-68.7615	-68.8033	-68.7615	-68.7615	-68.7615	-68.8033	-68.7615	-68.7615	-68.7615	-68.7615	-68.7615	-68.7615	-68.8033	-68.7615	-68.7615
2008-03-18 01:39:40	12.865	21.3678	-68.8033	-68.7615	-68.887	-68.8033	-68.7197	-68.8033	-68.8451	-68.8033	-68.8033	-68.7615	-68.7615	-68.7615	-68.7615	-68.8451	-68.8033	-68.7615	-68.8033	-68.7615	-68.7615	-68.7615	-68.7615	-68.7615	-68.7615	-68.7615	-68.8033	-68.7615	-68.7615	-68.7615	-68.7615	-68.8033	-68.7615	-68.8033	-68.7615	-68.8033	-68.7615	-68.7615	-68.7615	-68.7615	-68.7615	-68.7615	-68.7615
2008-03-18 01:40:00	12.865	21.3971	23.3607	-68.5946	-68.7197	-68.7615	-68.7615	-68.7615	-68.8451	-68.8451	-68.8033	-68.8451	-68.7615	-68.7615	-68.7197	-68.7615	-68.7615	-68.7615	-68.7615	-68.7615	-68.8033	-68.8033	-68.7615	-68.7615	-68.7615	-68.7615	-68.7615	-68.7615	-68.7615	-68.7615	-68.7615	-68.7615	-68.7615	-68.7615	-68.7615	-68.7615	-68.7615	-68.7615	-68.7615	-68.7615	-68.7615	-68.8033	-68.8033
2008-03-18 01:40:20	12.8644	21.3971	22.6857	-68.5946	-68.8033	-68.7615	-68.8033	-68.7197	-68.7615	-68.7615	-68.7615	-68.8033	-68.7197	-68.7197	-68.7615	-68.7615	-68.7615	-68.7615	-68.8033	-68.8033	-68.7615	-68.8033	-68.8033	-68.7615	-68.7615	-68.8033	-68.7615	-68.8033	-68.7615	-68.7615	-68.7615	-68.8033	-68.7615	-68.7615	-68.7615	-68.7615	-68.7615	-68.8033	-68.7615	-68.8033	-68.7615	-68.7615	-68.7615
2008-03-18 01:40:40	12.8644	21.4243	22.5626	-68.5946	-68.8033	-68.8033	-68.7197	-68.7615	-68.8451	-68.7197	-68.7615	-68.8451	-68.7197	-68.8451	-68.8033	-68.8033	-68.7615	-68.7615	-68.8033	-68.7615	-68.7615	-68.7615	-68.7615	-68.7615	-68.8033	-68.7615	-68.7615	-68.7615	-68.7615	-68.7615	-68.8033	-68.7615	-68.7615	-68.7615	-68.7615	-68.7615	-68.7615	-68.7615	-68.8033	-68.7615	-68.8033	-68.7615	-68.8033
2008-03-18 01:41:00	12.8644	21.4514	22.3319	-68.5946	-68.7615	-68.7615	-68.8033	-68.8451	-68.7615	-68.7197	-68.7615	-68.7615	-68.7615	-68.7615	-68.7197	-68.7615	-68.7615	-68.7615	-68.7615	-68.8033	-68.7615	-68.8033	-68.8033	-68.8033	-68.8033	-68.7615	-68.7615	-68.8033	-68.7615	-68.7615	-68.7615	-68.7615	-68.8033	-68.7615	-68.7615	-68.7615	-68.7615	-68.7615	-68.7615	-68.8033	-68.7615	-68.8033	-68.8033
2008-03-18 01:41:20	12.8648	21.4514	23.9144	-68.5529	-68.7615	-68.7615	-68.7615	-68.7615	-68.7615	-68.7615	-68.678	-68.7615	-68.8033	-68.8033	-68.7197	-68.7615	-68.7615	-68.7615	-68.7615	-68.8033	-68.7615	-68.7615	-68.8033	-68.7615	-68.8033	-68.7615	-68.7615	-68.7615	-68.8033	-68.8033	-68.7615	-68.7615	-68.7615	-68.7615	-68.7615	-68.7615	-68.7615	-68.7615	-68.7615	-68.7615	-68.8033	-68.7615	-68.7615
2008-03-18 01:41:40	12.8648	21.4785	22.6799	-68.6363	-68.7615	-68.8451	-68.8033	-68.7615	-68.7197	-68.7197	-68.8451	-68.7615	-68.8451	-68.8451	-68.8033	-68.8451	-68.7615	-68.7615	-68.7615	-68.7615	-68.7615	-68.8033	-68.8033	-68.7615	-68.8033	-68.8033	-68.7197	-68.7615	-68.7615	-68.7615	-68.7615	-68.7615	-68.7615	-68.7615	-68.8033	-68.7197	-68.8033	-68.8033	-68.7615	-68.7615	-68.7615	-68.7615	-68.8033
2008-03-18 01:42:00	12.8597	21.5056	22.5899	-68.6363	-68.7615	-68.8033	-68.8033	-68.8451	-68.7197	-68.7615	-68.8451	-68.8451	-68.7197	-68.7615	-68.7197	-68.7615	-68.7615	-68.7615	-68.7615	-68.7615	-68.7615	-68.7615	-68.7615	-68.7615	-68.7615	-68.7615	-68.8033	-68.7615	-68.7615	-68.7615	-68.7615	-68.8033	-68.7615	-68.7615	-68.8033	-68.7615	-68.8033	-68.8033	-68.7615	-68.7615	-68.7615	-68.7615	-68.7615
2008-03-18 01:42:20	12.865	21.5056	22.5549	-68.5946	-68.7615	-68.7197	-68.7615	-68.8451	-68.8033	-68.7615	-68.8451	-68.7197	-68.7615	-68.7197	-68.7615	-68.7615	-68.8033	-68.8033	-68.7615	-68.7615	-68.8033	-68.7615	-68.7615	-68.8033	-68.7615	-68.7615	-68.7615	-68.7615	-68.7615	-68.8033	-68.7615	-68.7615	-68.7615	-68.8033	-68.7615	-68.7615	-68.8033	-68.7615	-68.7615	-68.7615	-68.7615	-68.7615	-68.7615
2008-03-18 01:42:40	12.865	21.5327	22.3448	-68.678	-68.7615	-68.7197	-68.8033	-68.7615	-68.7197	-68.8033	-68.8033	-68.7615	-68.7615	-68.7615	-68.8451	-68.7615	-68.7615	-68.7615	-68.8033	-68.7615	-68.7615	-68.7615	-68.7615	-68.8033	-68.7615	-68.7615	-68.8033	-68.8033	-68.7615	-68.8033	-68.7615	-68.7615	-68.7615	-68.7615	-68.7615	-68.7615	-68.7615	-68.7615	-68.7615	-68.7615	-68.7615	-68.7615	-68.7615
2008-03-18 01:43:00	12.8649	21.5327	22.3257	-68.678	-68.8033	-68.8033	-68.7615	-68.7615	-68.8033	-68.7615	-68.8033	-68.7615	-68.8033	-68.7197	-68.7615	-68.7615	-68.7615	-68.8033	-68.7615	-68.7615	-68.7615	-68.7615	-68.7615	-68.7615	-68.7615	-68.7615	-68.7615	-68.7615	-68.7615	-68.7615	-68.7615	-68.7615	-68.8033	-68.7615	-68.7615	-68.7615	-68.7615	-68.7615	-68.7615	-68.7615	-68.7615	-68.8033	-68.8033
2008-03-18 01:43:20	12.8594	21.5598	22.3431	-68.6363	-68.7615	-68.8033	-68.8033	-68.8033	-68.7615	-68.7615	-68.7615	-68.7615	-68.7615	-68.7615	-68.7197	-68.7615	-68.7615	-68.7615	-68.7615	-68.7615	-68.8033	-68.7615	-68.7615	-68.7615	-68.7615	-68.8033	-68.7197	-68.7615	-68.7615	-68.8033	-68.7615	-68.7615	-68.7615	-68.7615	-68.7615	-68.8033	-68.7615	-68.7615	-68.7615	-68.8033	-68.7615	-68.7615	-68.7615
2008-03-18 01:43:40	12.8589	21.5598	22.3593	-68.5946	-68.8033	-68.8033	-68.8033	-68.7615	-68.7615	-68.8451	-68.7197	-68.8451	-68.5946	-68.8033	-68.7615	-68.8033	-68.8033	-68.7615	-68.7615	-68.7615	-68.7615	-68.7197	-68.7615	-68.7615	-68.8033	-68.7615	-68.7615	-68.7615	-68.7615	-68.7615	-68.7615	-68.8033	-68.7615	-68.7615	-68.7615	-68.7615	-68.7615	-68.8033	-68.8033	-68.7615	-68.8033	-68.7615	-68.7615
2008-03-18 01:44:00	12.8639	21.5869	22.5667	-68.678	-68.7615	-68.8033	-68.7615	-68.8451	-68.7615	-68.8033	-68.8033	-68.8033	-68.8033	-68.8033	-68.7197	-68.7615	-68.7615	-68.8033	-68.7615	-68.7615	-68.7615	-68.7615	-68.8033	-68.8033	-68.7615	-68.7615	-68.7615	-68.7615	-68.7615	-68.7615	-68.7615	-68.7197	-68.7615	-68.8033	-68.8033	-68.7615	-68.7615	-68.7615	-68.7615	-68.8033	-68.8033	-68.7615	-68.7615
2008-03-18 01:44:20	12.8584	21.6163	22.3742	-68.678	-68.7615	-68.8033	-68.7615	-68.8451	-68.7197	-68.7197	-68.7197	-68.7615	-68.7197	-68.8033	-68.8033	-68.7615	-68.7615	-68.7615	-68.8033	-68.7615	-68.7615	-68.7615	-68.7615	-68.7615	-68.7615	-68.7615	-68.7615	-68.7615	-68.8033	-68.7615	-68.7615	-68.7615	-68.7615	-68.7615	-68.8033	-68.7615	-68.8033	-68.7615	-68.7615	-68.7615	-68.7615	-68.7615	-68.7615
2008-03-18 01:44:40	12.8581	21.6163	22.4594	-68.6363	-68.7615	-68.7615	-68.7197	-68.7615	-68.7197	-68.7197	-68.8033	-68.8451	-68.8451	-68.7197	-68.7615	-68.8033	-68.7615	-68.7615	-68.7615	-68.7615	-68.8033	-68.7615	-68.7615	-68.7615	-68.7615	-68.8033	-68.7615	-68.7615	-68.7615	-68.7615	-68.7615	-68.8033	-68.7615	-68.7615	-68.7615	-68.7615	-68.7615	-68.7615	-68.7615	-68.8033	-68.8033	-68.8033	-68.8033
2008-03-18 01:45:00	12.8633	21.6434	-68.8033	-68.8033	-68.7615	-68.7615	-68.7615	-68.7615	-68.7615	-68.7615	-68.8033	-68.7615	-68.7615	-68.7615	-68.7615	-68.7615	-68.7615	-68.7615	-68.7615	-68.7615	-68.7615	-68.7615	-68.7615	-68.7615	-68.7615	-68.7615	-68.7615	-68.7615	-68.7615	-68.8033	-68.7615	-68.7615	-68.7615	-68.7615	-68.7615	-68.7615	-68.8033	-68.7615	-68.7615	-68.7615	-68.7615	-68.7615	-68.7615
2008-03-18 02:57:00	12.9815	21.1238	22.2565	22.4135	22.4135	22.239	22.2042	22.3786	22.3786	22.3436	22.4485	22.3436	22.2738	22.2042	22.4135	22.5187	-68.8033	-68.7615	-68.7615	-68.8033	-68.7615	-68.8033	-68.7615	-68.8033	-68.7615	-68.8033	-68.7615	-68.7615	-68.7615	-68.7615	-68.8033	-68.7615	-68.7615	-68.8033	-68.7615	-68.7615	-68.7615	-68.8033	-68.8033	22.3786	22.1347	22.2565	22.4135
2008-03-18 02:57:20	12.9705	21.1238	22.2738	22.4135	22.4135	22.239	22.2042	22.3786	22.3786	22.3436	22.4485	22.3436	22.2738	22.2042	22.4135	22.5187	-68.8033	-68.8033	-68.7615	-68.7615	-68.7615	-68.8033	-68.7615	-68.8033	-68.7615	-68.8033	-68.7615	-68.7615	-68.8033	-68.7615	-68.7615	-68.8033	-68.7615	-68.7615	-68.8033	-68.7615	-68.7615	-68.8033	-68.8033	22.3786	22.1347	22.2738	22.4135
2008-03-18 02:57:40	12.9651	21.1509	22.2738	22.431	22.4135	22.239	22.2042	22.3786	22.3786	22.3611	22.4485	22.3436	22.2738	22.2042	22.396	22.5187	-68.8033	-68.7615	-68.7615	-68.7615	-68.7615	-68.8033	-68.7615	-68.8033	-68.7615	-68.8033	-68.7615	-68.7615	-68.7615	-68.7615	-68.8033	-68.7615	-68.7615	-68.8033	-68.7197	-68.7615	-68.7615	-68.8033	-68.7615	22.3786	22.1347	22.2738	22.4135
2008-03-18 02:58:00	12.976	21.1509	22.2738	22.4485	22.4135	22.239	22.2042	22.3786	22.3786	22.3611	22.4485	22.3436	22.2738	22.2042	22.4135	22.5187	-68.8033	-68.7615	-68.7615	-68.8033	-68.7615	-68.8033	-68.7615	-68.8033	-68.7615	-68.7615	-68.7615	-68.8033	-68.7615	-68.7615	-68.8033	-68.7615	-68.7615	-68.7615	-68.8033	-68.7615	-68.7615	-68.8033	-68.8033	22.3786	22.1347	22.2738	22.4135
2008-03-18 02:58:20	12.976	21.1509	22.2738	22.4485	22.4135	22.239	22.2042	22.396	22.3786	22.3786	22.4485	22.3436	22.2738	22.2042	22.4135	22.5362	-68.8033	-68.7615	-68.7615	-68.8033	-68.7615	-68.7615	-68.7615	-68.8033	-68.7615	-68.8033	-68.7615	-68.7615	-68.7615	-68.7615	-68.7615	-68.7615	-68.7615	-68.8033	-68.7615	-68.7615	-68.7615	-68.8033	-68.7615	22.3786	22.1347	22.2738	22.431
2008-03-18 02:58:40	12.976	21.178	22.2738	22.4485	22.431	22.239	22.2042	22.396	22.4135	22.3786	22.4485	22.3436	22.2738	22.239	22.4135	22.5362	-68.7615	-68.8033	-68.7615	-68.8033	-68.7615	-68.7615	-68.7615	-68.7615	-68.8033	-68.7615	-68.8033	-68.7615	-68.8033	-68.8033	-68.7615	-68.7615	-68.7615	-68.7615	-68.7615	-68.7615	-68.8033	-68.8033	-68.7615	22.3786	22.1347	22.2738	22.4485
2008-03-18 02:59:00	12.9705	21.178	22.2722	22.4469	22.4119	22.2374	22.2374	22.4119	22.3943	22.377	22.4469	22.342	22.2722	22.2374	22.4119	22.5521	-68.8033	-68.7615	-68.7615	-68.8033	-68.7615	-68.8033	-68.7615	-68.8033	-68.7615	-68.8033	-68.7615	-68.7615	-68.7615	-68.7615	-68.8033	-68.7615	-68.7615	-68.7615	-68.7615	-68.7615	-68.7615	-68.7615	-68.8033	22.377	22.1504	22.2722	22.4469
2008-03-18 02:59:20	12.9705	21.178	22.2725	22.4648	22.4297	22.2377	22.2377	22.4123	22.3947	22.3773	22.4648	22.3423	22.2725	22.2377	22.4123	22.5349	-68.7615	-68.7615	-68.8033	-68.8033	-68.8033	-68.7615	-68.8033	-68.7615	-68.8033	-68.8033	-68.8033	-68.7615	-68.8033	-68.8033	-68.7615	-68.8033	-68.8033	-68.7615	-68.7615	-68.7615	-68.8033	-68.7615	-68.7615	22.3947	22.1508	22.2725	22.4473
2008-03-18 02:59:40	12.9705	21.178	22.2725	22.4648	22.4473	22.2377	22.2377	22.4123	22.3947	22.3773	22.4648	22.3423	22.2725	22.2377	22.4123	22.5525	-68.7615	-68.7615	-68.7615	-68.8033	-68.7615	-68.7615	-68.7615	-68.7615	-68.7615	-68.8033	-68.7615	-68.8033	-68.7615	-68.8033	-68.8033	-68.7615	-68.7615	-68.8033	-68.7615	-68.7615	-68.7615	-68.8033	-68.8033	22.3947	22.1334	22.2725	22.4473
2008-03-18 03:00:00	12.9486	21.178	22.2728	22.465	22.43	22.2554	22.238	22.4124	22.395	22.3775	22.4826	22.3601	22.2903	22.238	22.4124	22.5351	-68.7615	-68.7615	-68.7615	-68.8033	-68.7615	-68.7615	-68.8033	-68.7615	-68.7615	-68.7197	-68.7615	-68.7615	-68.7615	-68.7615	-68.7615	-68.7615	-68.7615	-68.7615	-68.8033	-68.8033	-68.7615	-68.8033	-68.7615	22.4124	22.151	22.2728	22.4475
2008-03-18 03:00:20	12.9432	21.178	22.273	22.4827	22.4477	22.273	22.2381	22.4127	22.4127	22.3777	22.4827	22.3603	22.2905	22.2381	22.4127	22.5529	-68.7615	-68.7615	-68.7615	-68.7615	-68.7615	-68.8033	-68.7615	-68.7615	-68.7615	-68.8033	-68.7615	-68.7615	-68.8033	-68.7615	-68.8033	-68.7615	-68.7615	-68.8033	-68.7615	-68.7615	-68.8033	-68.7615	-68.7615	22.4127	22.1338	22.273	22.4477
2008-03-18 03:00:40	12.9377	21.178	22.273	22.4827	22.4477	22.273	22.2381	22.4127	22.4127	22.3777	22.4827	22.3777	22.3079	22.2381	22.4127	22.5529	-68.7615	-68.7615	-68.7615	-68.7615	-68.7615	-68.7615	-68.7615	-68.7615	-68.7615	-68.7615	-68.8033	-68.7615	-68.7615	-68.7615	-68.7615	-68.7615	-68.7615	-68.7615	-68.7615	-68.7615	-68.8033	-68.7615	-68.7615	22.3952	22.1338	22.273	22.4477
2008-03-18 03:01:00	12.9318	21.2051	22.2732	22.4829	22.4479	22.2732	22.2732	22.4129	22.4129	22.3954	22.4829	22.3604	22.3081	22.2558	22.4129	22.553	-68.7615	-68.7615	-68.7615	-68.7615	-68.7615	-68.7615	-68.8033	-68.7615	-68.7615	-68.7615	-68.8033	-68.7615	-68.7615	-68.7615	-68.7615	-68.7615	-68.7615	-68.7615	-68.7615	-68.7615	-68.7615	-68.7615	-68.7615	22.4129	22.1514	22.2732	22.4829
2008-03-18 03:01:20	12.9263	21.2051	22.2732	22.4829	22.4479	22.2732	22.2732	22.4129	22.4129	22.3954	22.4829	22.3779	22.3081	22.2732	22.4129	22.553	-68.8033	-68.8033	-68.8033	-68.7615	-68.7615	-68.8033	-68.7615	-68.7615	-68.7615	-68.8033	-68.7615	-68.7615	-68.8033	-68.7615	-68.7615	-68.7615	-68.8033	-68.8033	-68.7615	-68.7615	-68.8033	-68.7615	-68.8033	22.3954	22.1514	22.9058	22.9766
2008-03-18 03:01:40	12.9264	21.2051	22.2733	22.4831	22.448	22.2733	22.2733	22.413	22.413	22.3955	22.4831	22.378	22.3082	22.2733	22.413	22.5707	-68.7615	-68.8033	-68.7615	-68.7615	-68.7615	-68.7615	-68.7615	-68.7615	-68.7615	-68.8033	-68.8033	-68.7615	-68.8033	-68.8033	-68.8033	-68.8033	-68.8033	-68.7615	-68.8033	-68.7615	-68.7615	-68.8033	-68.7615	22.3955	22.1341	25.9251	25.7722
2008-03-18 03:02:00	12.921	21.2322	22.2734	22.4831	22.4481	22.2734	22.2734	22.4131	22.4131	22.3782	22.4831	22.3782	22.3083	22.2734	22.4306	22.5533	-68.7615	-68.8033	-68.7615	-68.7615	-68.7615	-68.7615	-68.8033	-68.7615	-68.7615	-68.8033	-68.7615	-68.7615	-68.7615	-68.7615	-68.8033	-68.7615	-68.7615	-68.7615	-68.8033	-68.8033	-68.8033	-68.8033	-68.7615	22.4131	22.1516	27.4082	27.4879
2008-03-18 03:02:20	12.9155	21.2322	22.2909	22.4831	22.4481	22.2734	22.2734	22.4131	22.4131	22.4131	22.4831	22.3782	22.3083	22.2734	22.4306	22.5708	-68.7615	-68.7615	-68.8033	-68.7615	-68.7615	-68.7615	-68.7615	-68.8033	-68.8033	-68.8033	-68.8033	-68.8033	-68.8033	-68.7615	-68.8033	-68.8033	-68.8033	-68.7615	-68.7615	-68.7615	-68.8033	-68.8033	-68.8033	22.4131	22.169	27.768	27.9895
2008-03-18 03:02:40	12.9101	21.2322	22.2909	22.4832	22.4482	22.2735	22.2735	22.4132	22.4132	22.4132	22.4832	22.3782	22.3084	22.2735	22.4482	22.5885	-68.7615	-68.7615	-68.7615	-68.8033	-68.7615	-68.7615	-68.8033	-68.7615	-68.7615	-68.7615	-68.7615	-68.7615	-68.7615	-68.7615	-68.7615	-68.7615	-68.8033	-68.7615	-68.7615	-68.8033	-68.8033	-68.8033	-68.7615	22.4132	22.169	27.488	27.8082
2008-03-18 03:03:00	12.9101	21.2322	22.3084	22.4833	22.4483	22.2736	22.2736	22.4133	22.4133	22.4133	22.4833	22.3783	22.3084	22.2736	22.4483	22.571	-68.7615	-68.8033	-68.7615	-68.7615	-68.8033	-68.7615	-68.7615	-68.7615	-68.8033	-68.7615	-68.7615	-68.7615	-68.8033	-68.8033	-68.7615	-68.7615	-68.7615	-68.7615	-68.8033	-68.7615	-68.8033	-68.8033	-68.7615	22.4133	22.1691	27.2298	27.6479
2008-03-18 03:03:20	12.9047	21.2322	22.3084	22.4833	22.4483	22.2736	22.2736	22.4307	22.4133	22.4133	22.4833	22.4133	22.3084	22.2736	22.4483	22.5535	-68.7615	-68.7615	-68.7615	-68.7615	-68.8033	-68.7615	-68.8033	-68.7615	-68.7615	-68.7615	-68.7615	-68.7615	-68.7615	-68.8033	-68.7615	-68.7615	-68.7615	-68.7615	-68.7615	-68.7615	-68.7615	-68.7615	-68.8033	22.4133	22.1691	27.0126	27.4482
2008-03-18 03:03:40	12.9047	21.2593	22.3085	22.4833	22.4483	22.2737	22.2737	22.4308	22.4133	22.4133	22.4833	22.4133	22.326	22.2737	22.4483	22.5535	-68.8033	-68.7615	-68.7615	-68.8033	-68.7615	-68.7615	-68.8033	-68.7615	-68.7615	-68.8033	-68.8033	-68.8033	-68.7615	-68.7615	-68.7615	-68.7615	-68.8033	-68.8033	-68.7615	-68.7615	-68.8033	-68.8033	-68.7615	22.4133	22.1692	26.7771	27.2299
2008-03-18 03:04:00	12.8992	21.2593	22.3085	22.4833	22.4483	22.2737	22.2737	22.4133	22.4133	22.4133	22.5008	22.4133	22.3434	22.2737	22.4483	22.5886	-68.7615	-68.7615	-68.7615	-68.8033	-68.7615	-68.7615	-68.8033	-68.7615	-68.8033	-68.7615	-68.7615	-68.7615	-68.7615	-68.7197	-68.7615	-68.7615	-68.7197	-68.8033	-68.7197	-68.7615	-68.7615	-68.7615	-68.7615	22.4133	22.1692	26.582	27.0127
2008-03-18 03:04:20	12.8992	21.2593	22.3085	22.4835	22.466	22.2737	22.2737	22.4308	22.4308	22.4134	22.4835	22.4134	22.3435	22.2737	22.4483	22.5887	-68.7615	-68.7615	-68.7615	-68.7615	-68.7615	-68.7615	-68.7615	-68.8033	-68.7615	-68.7615	-68.8033	-68.7615	-68.7615	-68.7615	-68.8033	-68.7615	-68.7197	-68.7615	-68.7615	-68.7615	-68.7615	-68.7615	-68.7615	22.4134	22.1692	26.3877	26.8555
2008-03-18 03:04:40	12.8993	21.2593	22.3086	22.5009	22.4659	22.2736	22.2912	22.4484	22.4308	22.4134	22.5009	22.4134	22.326	22.2736	22.4484	22.5887	-68.7615	-68.7615	-68.7615	-68.7615	-68.8033	-68.7615	-68.7615	-68.8033	-68.8033	-68.7615	-68.7615	-68.7615	-68.7615	-68.8033	-68.7615	-68.7615	-68.8033	-68.8033	-68.8033	-68.8033	-68.8033	-68.8033	-68.8033	22.4134	22.1693	26.1945	26.66
2008-03-18 03:05:00	12.8938	21.2593	22.3086	22.5009	22.4659	22.2912	22.2736	22.4484	22.4308	22.4134	22.5009	22.4134	22.3435	22.2736	22.4484	22.5887	-68.7615	-68.7615	-68.7615	-68.7615	-68.8033	-68.7615	-68.8033	-68.7615	-68.7615	-68.7615	-68.8033	-68.7615	-68.7615	-68.8033	-68.8033	-68.7615	-68.7615	-68.7615	-68.7615	-68.8033	-68.8033	-68.8033	-68.8033	22.4134	22.1693	26.0021	26.4653
2008-03-18 03:05:20	12.8934	21.2593	22.3228	22.5153	22.4801	22.2704	22.2879	22.4451	22.4276	22.4102	22.5153	22.4102	22.3402	22.2704	22.4451	22.5855	-68.7615	-68.7615	-68.8033	-68.7615	-68.7615	-68.8033	-68.7197	-68.7615	-68.7615	-68.7615	-68.7615	-68.8033	-68.7615	-68.7615	-68.7615	-68.7615	-68.7615	-68.7615	-68.8033	-68.8033	-68.7615	-68.8033	-68.7615	22.4102	22.166	25.8262	26.2679
2008-03-18 03:05:40	12.888	21.2864	22.3235	22.5159	22.4809	22.2887	22.2887	22.4458	22.4458	22.4109	22.5159	22.4109	22.3409	22.2711	22.4458	22.5861	-68.8033	-68.7615	-68.8033	-68.7615	-68.8033	-68.7615	-68.7615	-68.8033	-68.7615	-68.8033	-68.7615	-68.8033	-68.7615	-68.8033	-68.8033	-68.7615	-68.7615	-68.8033	-68.7197	-68.8033	-68.8033	-68.7615	-68.8033	22.4109	22.1668	25.6556	26.1145
2008-03-18 03:06:00	12.888	21.2864	22.3409	22.5159	22.4809	22.2711	22.3061	22.4458	22.4458	22.4109	22.5159	22.4109	22.3409	22.2711	22.4458	22.6037	-68.7615	-68.8033	-68.7615	-68.8033	-68.7615	-68.8033	-68.7615	-68.8033	-68.7615	-68.7615	-68.8033	-68.7615	-68.7615	-68.8033	-68.8033	-68.7197	-68.7615	-68.7615	-68.7615	-68.7615	-68.7615	-68.7615	-68.8033	22.4109	22.1668	25.5037	25.9226
2008-03-18 03:06:20	12.8881	21.2864	22.3415	22.5164	22.4814	22.2717	22.3066	22.4464	22.4464	22.4113	22.5164	22.4113	22.3415	22.2891	22.4464	22.5866	-68.7615	-68.7615	-68.7615	-68.7615	-68.8033	-68.8033	-68.7615	-68.7615	-68.8033	-68.7615	-68.7615	-68.7197	-68.7615	-68.7615	-68.7615	-68.7615	-68.7615	-68.7615	-68.7615	-68.8033	-68.8033	-68.8033	-68.8033	22.4113	22.1673	25.3531	25.7704
2008-03-18 03:06:40	12.8826	21.2864	22.324	22.5164	22.4814	22.2891	22.3066	22.4464	22.4464	22.4113	22.5164	22.4113	22.3415	22.3066	22.4464	22.6219	-68.7615	-68.7615	-68.8033	-68.7615	-68.7615	-68.7615	-68.7615	-68.7615	-68.8033	-68.7615	-68.7615	-68.7615	-68.8033	-68.7615	-68.8033	-68.7615	-68.7615	-68.8033	-68.7615	-68.8033	-68.8033	-68.7615	-68.8033	22.4113	22.1673	25.2025	25.6181
2008-03-18 03:07:00	12.8827	21.2864	22.3419	22.5169	22.4818	22.2895	22.3069	22.4468	22.4468	22.4118	22.5169	22.4118	22.3419	22.2895	22.4468	22.6048	-68.7615	-68.7615	-68.7615	-68.7615	-68.7615	-68.8033	-68.7615	-68.7615	-68.7615	-68.7615	-68.7197	-68.8033	-68.7615	-68.8033	-68.7615	-68.7615	-68.8033	-68.7615	-68.7615	-68.8033	-68.8033	-68.7615	-68.8033	22.4118	22.1676	25.053	25.467
2008-03-18 03:07:20	12.8827	21.3135	22.3423	22.5173	22.4822	22.2899	22.3074	22.4472	22.4472	22.4122	22.5173	22.4122	22.3423	22.3074	22.4472	22.6226	-68.7615	-68.8033	-68.7615	-68.7615	-68.8033	-68.7615	-68.7615	-68.7615	-68.7615	-68.7615	-68.8033	-68.7615	-68.7615	-68.7615	-68.8033	-68.7615	-68.7197	-68.7615	-68.7615	-68.7615	-68.8033	-68.8033	-68.8033	22.4122	22.168	24.9412	25.3162
2008-03-18 03:07:40	12.8773	21.3135	22.3423	22.5173	22.4822	22.2899	22.3074	22.4647	22.4472	22.4122	22.5173	22.4122	22.3423	22.3074	22.4472	22.6226	-68.8033	-68.7197	-68.8033	-68.7615	-68.8033	-68.7615	-68.8033	-68.7615	-68.7615	-68.7615	-68.8033	-68.7615	-68.8033	-68.7615	-68.8033	-68.7615	-68.7615	-68.7615	-68.7615	-68.8033	-68.7615	-68.8033	-68.7615	22.4122	22.168	24.7921	25.1659
2008-03-18 03:08:00	12.8773	21.3135	22.3425	22.5175	22.4825	22.3076	22.3076	22.4649	22.4473	22.4299	22.5175	22.4124	22.3425	22.3076	22.4473	22.6229	-68.8033	-68.7615	-68.7615	-68.7615	-68.7615	-68.7615	-68.8033	-68.7615	-68.7197	-68.8033	-68.7615	-68.7197	-68.8033	-68.7615	-68.8033	-68.7615	-68.7615	-68.7615	-68.7615	-68.7615	-68.8033	-68.7615	-68.7615	22.4124	22.1683	24.6811	25.0536
2008-03-18 03:08:20	12.8773	21.3407	22.3411	22.5337	22.4811	22.3063	22.3063	22.4811	22.4635	22.4285	22.5161	22.411	22.3411	22.3063	22.446	22.6215	-68.7615	-68.7615	-68.7615	-68.8033	-68.7615	-68.7615	-68.8033	-68.7615	-68.7615	-68.7615	-68.8033	-68.7615	-68.7615	-68.8033	-68.7615	-68.7615	-68.7615	-68.7197	-68.7615	-68.7615	-68.8033	-68.8033	-68.7615	22.4285	22.1669	24.5685	24.94
2008-03-18 03:08:40	12.8773	21.3407	22.3411	22.5512	22.4811	22.3063	22.3063	22.4811	22.4635	22.4285	22.5337	22.411	22.3411	22.3063	22.4635	22.6215	-68.7615	-68.7615	-68.7615	-68.7615	-68.7615	-68.8033	-68.7615	-68.8033	-68.8033	-68.8033	-68.7615	-68.7615	-68.7615	-68.7615	-68.7615	-68.7615	-68.7615	-68.7615	-68.7615	-68.7615	-68.7615	-68.8033	-68.8033	22.4285	22.1669	24.4577	24.8095
2008-03-18 03:09:00	12.8774	21.3407	22.3416	22.5342	22.4815	22.3066	22.3066	22.4815	22.464	22.429	22.5342	22.4115	22.3416	22.3066	22.464	22.622	-68.8033	-68.8033	-68.8033	-68.7615	-68.8033	-68.7615	-68.7615	-68.7615	-68.7615	-68.7615	-68.7615	-68.7615	-68.8033	-68.7615	-68.7615	-68.8033	-68.8033	-68.8033	-68.7615	-68.8033	-68.8033	-68.7615	-68.8033	22.429	22.1675	24.3479	24.7172
2008-03-18 03:09:20	12.8828	21.3407	22.3416	22.5518	22.4815	22.3066	22.3066	22.4815	22.464	22.429	22.5166	22.4115	22.3416	22.3066	22.4465	22.622	-68.7615	-68.8033	-68.7615	-68.7615	-68.7615	-68.8033	-68.7615	-68.7615	-68.7615	-68.7615	-68.7615	-68.7615	-68.8033	-68.7615	-68.7615	-68.7615	-68.7615	-68.7615	-68.7615	-68.7615	-68.7615	-68.8033	-68.7615	22.4115	22.1675	24.2744	24.606
2008-03-18 03:09:40	12.8774	21.3407	22.3388	22.5488	22.4786	22.3038	22.3213	22.4786	22.4786	22.4436	22.5313	22.4086	22.3388	22.3038	22.4611	22.6191	-68.7615	-68.7615	-68.7615	-68.7615	-68.7615	-68.7615	-68.7615	-68.7615	-68.7615	-68.7615	-68.7615	-68.7615	-68.7615	-68.7615	-68.7615	-68.8033	-68.7615	-68.7615	-68.8033	-68.8033	-68.7615	-68.8033	-68.8033	22.4262	22.1646	24.1613	24.492
2008-03-18 03:10:00	12.8719	21.3407	22.3398	22.5498	22.4796	22.3048	22.3048	22.4796	22.4796	22.4446	22.5146	22.4097	22.3398	22.3048	22.4621	22.6201	-68.7615	-68.8033	-68.7615	-68.8033	-68.7615	-68.7615	-68.7615	-68.8033	-68.8033	-68.8033	-68.7615	-68.8033	-68.7615	-68.7615	-68.7615	-68.7615	-68.7615	-68.8033	-68.7615	-68.7615	-68.8033	-68.7615	-68.7615	22.4097	22.1655	24.0893	24.4194
2008-03-18 03:10:20	12.8719	21.3678	22.3398	22.5498	22.4796	22.3048	22.3223	22.4796	22.4796	22.4446	22.5322	22.4097	22.3572	22.3048	22.4621	22.6201	-68.8033	-68.8033	-68.8033	-68.7615	-68.7615	-68.8033	-68.8033	-68.8033	-68.7615	-68.7197	-68.7615	-68.7615	-68.7615	-68.7615	-68.7615	-68.7197	-68.7615	-68.7615	-68.7615	-68.7615	-68.7615	-68.8033	-68.7615	22.4272	22.1829	23.9799	24.309
2008-03-18 03:10:40	12.8774	21.3678	22.3389	22.5489	22.4788	22.304	22.3215	22.4788	22.4788	22.4438	22.5314	22.4089	22.3563	22.304	22.4788	22.6192	-68.7615	-68.7615	-68.7615	-68.8033	-68.8033	-68.7615	-68.8033	-68.7615	-68.7615	-68.7615	-68.8033	-68.7615	-68.8033	-68.7615	-68.7615	-68.7615	-68.8033	-68.8033	-68.7615	-68.7615	-68.8033	-68.7615	-68.7615	22.4089	22.1821	23.9062	24.2347
2008-03-18 03:11:00	12.8711	21.3971	22.3382	22.5483	22.4781	22.3033	22.3382	22.4781	22.4781	22.4431	22.5307	22.4081	22.3556	22.3033	22.4781	22.6186	-68.7615	-68.7615	-68.8033	-68.8033	-68.7615	-68.8033	-68.7615	-68.8033	-68.8033	-68.8033	-68.7615	-68.7615	-68.7615	-68.8033	-68.7615	-68.7615	-68.7615	-68.8033	-68.7615	-68.8033	-68.7615	-68.7615	-68.7615	22.4081	22.1814	23.8329	24.1608
2008-03-18 03:11:20	12.8656	21.3971	22.3382	22.5483	22.4781	22.3033	22.3382	22.4781	22.4781	22.4431	22.5483	22.4256	22.3382	22.3033	22.4781	22.6186	-68.7615	-68.7615	-68.7615	-68.8033	-68.7615	-68.7615	-68.7615	-68.7615	-68.8033	-68.7615	-68.8033	-68.7615	-68.7615	-68.7615	-68.8033	-68.7615	-68.8033	-68.7615	-68.8033	-68.7615	-68.7615	-68.8033	-68.7615	22.4081	22.1988	23.7604	24.0877
2008-03-18 03:11:40	12.8658	21.3971	22.3393	22.5494	22.4792	22.3044	22.3393	22.4792	22.4792	22.4442	22.5494	22.4092	22.3567	22.3218	22.4792	22.6196	-68.8033	-68.7615	-68.7615	-68.7615	-68.8033	-68.7615	-68.7615	-68.8033	-68.7615	-68.7615	-68.7615	-68.7615	-68.7615	-68.7615	-68.8033	-68.8033	-68.7615	-68.7615	-68.7615	-68.7615	-68.7615	-68.7615	-68.7615	22.4092	22.1999	23.6892	23.9795
2008-03-18 03:12:00	12.8713	21.4243	22.3567	22.5494	22.4792	22.3044	22.3393	22.4792	22.4792	22.4442	22.5318	22.4267	22.3742	22.3044	22.4617	22.6196	-68.8033	-68.8033	-68.8033	-68.7615	-68.7615	-68.7615	-68.8033	-68.7615	-68.7615	-68.7615	-68.8033	-68.7615	-68.8033	-68.8033	-68.7615	-68.8033	-68.8033	-68.7615	-68.8033	-68.8033	-68.7615	-68.7615	-68.7615	22.4267	22.1999	23.617	23.9431
2008-03-18 03:12:20	12.8714	21.4243	22.3527	22.5453	22.4752	22.3004	22.3352	22.4752	22.4752	22.4402	22.5453	22.4052	22.3703	22.3352	22.4752	22.6156	-68.7615	-68.8033	-68.7615	-68.7615	-68.7615	-68.7615	-68.7615	-68.7197	-68.7615	-68.7615	-68.7615	-68.8033	-68.8033	-68.8033	-68.7615	-68.7615	-68.8033	-68.7615	-68.8033	-68.7615	-68.8033	-68.7615	-68.7615	22.4052	22.1611	23.5767	23.8661
2008-03-18 03:12:40	12.8711	21.4243	22.3528	22.5453	22.4752	22.3004	22.3178	22.4752	22.4752	22.4402	22.5453	22.4402	22.3702	22.3353	22.4752	22.6156	-68.7615	-68.8033	-68.7615	-68.7615	-68.8033	-68.8033	-68.7615	-68.8033	-68.7615	-68.8033	-68.8033	-68.8033	-68.7615	-68.7615	-68.8033	-68.7615	-68.8033	-68.7615	-68.8033	-68.7615	-68.8033	-68.7615	-68.8033	22.4227	22.1959	23.5047	23.7936
2008-03-18 03:13:00	12.8711	21.4514	22.3528	22.5453	22.4752	22.3004	22.3353	22.4752	22.4752	22.4402	22.5453	22.4227	22.3702	22.3353	22.4752	22.6332	-68.7615	-68.7615	-68.7615	-68.8033	-68.7615	-68.7615	-68.7615	-68.7615	-68.7615	-68.8033	-68.8033	-68.7615	-68.7615	-68.7615	-68.8033	-68.7615	-68.7615	-68.7615	-68.7615	-68.7615	-68.7615	-68.7615	-68.8033	22.4227	22.1959	23.4688	23.7573
2008-03-18 03:13:20	12.8704	21.4514	22.3528	22.5453	22.4927	22.3178	22.3353	22.4752	22.4752	22.4402	22.5453	22.4402	22.3703	22.3178	22.4752	22.6156	-68.8033	-68.7615	-68.8033	-68.7615	-68.8033	-68.7615	-68.8033	-68.7615	-68.8033	-68.8033	-68.7615	-68.8033	-68.7615	-68.7615	-68.7615	-68.8033	-68.7615	-68.7615	-68.7615	-68.7615	-68.7615	-68.7615	-68.8033	22.4053	22.1959	23.397	23.6851
2008-03-18 03:13:40	12.8648	21.4514	22.3703	22.5454	22.4928	22.3179	22.3353	22.4753	22.4753	22.4403	22.5454	22.4403	22.3703	22.3353	22.4753	22.6333	-68.8033	-68.7615	-68.7615	-68.7615	-68.8033	-68.7615	-68.7615	-68.8033	-68.8033	-68.7615	-68.8033	-68.7615	-68.7615	-68.7615	-68.7615	-68.7615	-68.7615	-68.7615	-68.7615	-68.7615	-68.7615	-68.7615	-68.7615	22.4053	22.196	23.3612	23.6489
2008-03-18 03:14:00	12.8648	21.4514	22.3703	22.5454	22.4753	22.3353	22.3353	22.4753	22.4753	22.4577	22.5454	22.4403	22.3703	22.3353	22.4753	22.6509	-68.8033	-68.7615	-68.8033	-68.8033	-68.7615	-68.7615	-68.8033	-68.7615	-68.7615	-68.7615	-68.8033	-68.7615	-68.7615	-68.8033	-68.7615	-68.7615	-68.8033	-68.8033	-68.8033	-68.8033	-68.7615	-68.8033	-68.8033	22.4227	22.196	23.3254	23.5768
2008-03-18 03:14:20	12.8698	21.4785	22.3703	22.5455	22.4929	22.3179	22.3354	22.4753	22.4753	22.4578	22.5455	22.4403	22.3703	22.3354	22.4753	22.6509	-68.8033	-68.8033	-68.7615	-68.7615	-68.7615	-68.7615	-68.8033	-68.7615	-68.8033	-68.8033	-68.7615	-68.7615	-68.8033	-68.7615	-68.7615	-68.7615	-68.7615	-68.7615	-68.8033	-68.7615	-68.7615	-68.7615	-68.7615	22.4053	22.196	23.2538	23.5408
2008-03-18 03:14:40	12.8698	21.4785	22.3703	22.5455	22.4929	22.3354	22.3354	22.4753	22.4753	22.4578	22.5455	22.4403	22.3703	22.3354	22.4753	22.6509	-68.7615	-68.7615	-68.8033	-68.8033	-68.7615	-68.8033	-68.8033	-68.7615	-68.8033	-68.8033	-68.7615	-68.7615	-68.8033	-68.7615	-68.8033	-68.8033	-68.7615	-68.7615	-68.7615	-68.8033	-68.8033	-68.7615	-68.7615	22.4053	22.196	23.2181	23.5048
2008-03-18 03:15:00	12.8643	21.5056	22.3704	22.5454	22.5103	22.318	22.3354	22.4753	22.4753	22.4753	22.5454	22.4403	22.3704	22.3354	22.4753	22.6509	-68.7615	-68.7615	-68.7615	-68.8033	-68.7615	-68.7615	-68.7615	-68.8033	-68.7615	-68.8033	-68.7615	-68.7615	-68.8033	-68.8033	-68.7615	-68.8033	-68.7615	-68.7615	-68.8033	-68.7615	-68.7615	-68.8033	-68.7615	22.4228	22.196	23.1824	23.4689
2008-03-18 03:15:20	12.8639	21.5056	22.3687	22.5438	22.5087	22.3338	22.3338	22.4912	22.4736	22.4562	22.5438	22.4387	22.3687	22.3338	22.4736	22.6492	-68.7615	-68.8033	-68.7615	-68.8033	-68.7615	-68.7615	-68.7615	-68.7615	-68.7615	-68.7615	-68.7615	-68.8033	-68.8033	-68.8033	-68.7615	-68.7615	-68.7615	-68.8033	-68.8033	-68.8033	-68.8033	-68.7615	-68.7615	22.4212	22.1944	23.1451	23.3954
2008-03-18 03:15:40	12.8584	21.5056	22.3687	22.5789	22.5087	22.3338	22.3338	22.4736	22.4736	22.4736	22.5438	22.4387	22.3687	22.3338	22.4736	22.6492	-68.8033	-68.7615	-68.7615	-68.8033	-68.8033	-68.7615	-68.7615	-68.8033	-68.7615	-68.8033	-68.8033	-68.8033	-68.8033	-68.8033	-68.7615	-68.8033	-68.8033	-68.8033	-68.8033	-68.7615	-68.8033	-68.7615	-68.7615	22.4212	22.1944	23.1095	23.3954
2008-03-18 03:16:00	12.8644	21.5056	22.3675	22.5426	22.5074	22.3325	22.3325	22.4899	22.4724	22.4724	22.5426	22.4374	22.3675	22.3325	22.4724	22.648	-68.7615	-68.7615	-68.7615	-68.8033	-68.8033	-68.8033	-68.7615	-68.8033	-68.7615	-68.8033	-68.7615	-68.8033	-68.7615	-68.7615	-68.7615	-68.7615	-68.8033	-68.7615	-68.7615	-68.7615	-68.7615	-68.7615	-68.7615	22.4024	22.1931	23.0726	23.3403
2008-03-18 03:16:20	12.8694	21.5327	22.3647	22.5574	22.4873	22.3298	22.3298	22.4873	22.4697	22.4697	22.5398	22.4347	22.3647	22.3298	22.4697	22.6452	-68.7615	-68.7615	-68.7615	-68.7615	-68.8033	-68.8033	-68.7615	-68.7615	-68.8033	-68.7615	-68.7615	-68.8033	-68.7615	-68.7615	-68.8033	-68.7615	-68.8033	-68.8033	-68.7615	-68.7615	-68.8033	-68.7615	-68.7615	22.4172	22.1905	23.0342	23.3196
2008-03-18 03:16:40	12.864	21.5327	22.3647	22.5574	22.5048	22.3298	22.3298	22.5048	22.4873	22.4697	22.5398	22.4347	22.3647	22.3298	22.4697	22.6452	-68.7615	-68.7615	-68.7615	-68.8033	-68.7615	-68.7615	-68.7615	-68.8033	-68.7615	-68.7615	-68.7615	-68.7615	-68.7615	-68.7615	-68.7615	-68.7615	-68.8033	-68.8033	-68.7615	-68.8033	-68.7615	-68.8033	-68.7615	22.4172	22.1905	22.9987	23.2839
2008-03-18 03:17:00	12.8636	21.5598	22.3627	22.5728	22.5026	22.3277	22.3277	22.5026	22.4676	22.4676	22.5377	22.4325	22.3627	22.3277	22.4676	22.6431	-68.7615	-68.8033	-68.7615	-68.7615	-68.7615	-68.7615	-68.7615	-68.7615	-68.7615	-68.7615	-68.8033	-68.7615	-68.8033	-68.7615	-68.7615	-68.8033	-68.7615	-68.8033	-68.7615	-68.7615	-68.7615	-68.8033	-68.7615	22.4325	22.1883	22.961	23.2459
2008-03-18 03:17:20	12.8636	21.5598	22.3627	22.5728	22.5026	22.3277	22.3277	22.4851	22.4851	22.4676	22.5377	22.4325	22.3627	22.3277	22.4676	22.6431	-68.7615	-68.7615	-68.8033	-68.8033	-68.8033	-68.7615	-68.7615	-68.8033	-68.7615	-68.8033	-68.8033	-68.7615	-68.8033	-68.7615	-68.8033	-68.8033	-68.7615	-68.8033	-68.7615	-68.7615	-68.8033	-68.7615	-68.8033	22.4325	22.1883	22.9434	23.2101
2008-03-18 03:17:40	12.8638	21.5598	22.3609	22.5711	22.5009	22.326	22.326	22.5009	22.4833	22.4659	22.536	22.4309	22.3609	22.326	22.4659	22.6589	-68.7615	-68.7615	-68.7615	-68.7615	-68.7615	-68.8033	-68.8033	-68.7615	-68.7615	-68.7615	-68.8033	-68.8033	-68.8033	-68.8033	-68.8033	-68.8033	-68.7615	-68.7615	-68.7615	-68.7615	-68.7615	-68.7615	-68.7615	22.4309	22.1867	22.9238	23.1726
2008-03-18 03:18:00	12.8639	21.5869	22.3612	22.5538	22.5011	22.3263	22.3263	22.5011	22.4837	22.4661	22.5362	22.4311	22.3787	22.3263	22.4661	22.6592	-68.7197	-68.7615	-68.7615	-68.7615	-68.8033	-68.7615	-68.7615	-68.8033	-68.8033	-68.8033	-68.7615	-68.8033	-68.8033	-68.8033	-68.7615	-68.7615	-68.8033	-68.7615	-68.8033	-68.7615	-68.7615	-68.7615	-68.7615	22.4311	22.1869	22.8887	23.173
2008-03-18 03:18:20	12.8639	21.5869	22.3612	22.5713	22.5011	22.3263	22.3263	22.5011	22.5011	22.4661	22.5362	22.4311	22.3612	22.3263	22.4661	22.6417	-68.8033	-68.7615	-68.8033	-68.7615	-68.8033	-68.7615	-68.7615	-68.7615	-68.7615	-68.8033	-68.7615	-68.8033	-68.7615	-68.7615	-68.7615	-68.7615	-68.7615	-68.7615	-68.7615	-68.7615	-68.7615	-68.8033	-68.8033	22.4311	22.1869	22.8533	23.1373
2008-03-18 03:18:40	12.869	21.6163	22.3581	22.5683	22.4981	22.3232	22.3232	22.4981	22.4981	22.4631	22.5332	22.4631	22.3756	22.3232	22.4631	22.6386	-68.7615	-68.7615	-68.8033	-68.7615	-68.8033	-68.7615	-68.7615	-68.8033	-68.7615	-68.7615	-68.7615	-68.7615	-68.7615	-68.8033	-68.7615	-68.7615	-68.7615	-68.8033	-68.7615	-68.7615	-68.7615	-68.8033	-68.8033	22.4281	22.1838	22.8149	23.0985
2008-03-18 03:19:00	12.8633	21.6163	22.3764	22.5691	22.4989	22.3241	22.3241	22.4989	22.4989	22.4638	22.534	22.4464	22.3764	22.3241	22.4638	22.6394	-68.7615	-68.7615	-68.7615	-68.7615	-68.7615	-68.7615	-68.7615	-68.7615	-68.8033	-68.7615	-68.8033	-68.8033	-68.7615	-68.7615	-68.8033	-68.7615	-68.8033	-68.7615	-68.7615	-68.8033	-68.8033	-68.8033	-68.7615	22.4289	22.1847	22.8157	23.0994
2008-03-18 03:19:20	12.8633	21.6163	22.3589	22.5691	22.4989	22.3241	22.3241	22.4989	22.4989	22.4638	22.534	22.4638	22.3939	22.3241	22.4638	22.657	-68.7615	-68.7615	-68.7615	-68.7615	-68.7615	-68.8033	-68.8033	-68.8033	-68.7615	-68.8033	-68.7615	-68.8033	-68.7615	-68.7615	-68.8033	-68.8033	-68.7615	-68.7615	-68.8033	-68.7615	-68.8033	-68.8033	-68.7615	22.4289	22.1847	22.7804	23.0639
2008-03-18 03:19:40	12.8635	21.6434	22.3962	22.5714	22.5012	22.3263	22.3263	22.5012	22.5012	22.4662	22.5363	22.4487	22.3962	22.3263	22.4662	22.6769	-68.7615	-68.7615	-68.7615	-68.7615	-68.8033	-68.7615	-68.7615	-68.8033	-68.7615	-68.8033	-68.7615	-68.8033	-68.8033	-68.7615	-68.7615	-68.7615	-68.8033	-68.7615	-68.8033	-68.7615	-68.8033	-68.7615	-68.7615	22.4312	22.1869	22.7827	23.0306
2008-03-18 03:20:00	12.8635	21.6434	22.3788	22.5714	22.5012	22.3263	22.3263	22.5012	22.5012	22.4662	22.5363	22.4662	22.3962	22.3263	22.4837	22.6769	-68.7615	-68.7615	-68.7615	-68.7615	-68.7615	-68.8033	-68.7615	-68.8033	-68.7615	-68.8033	-68.7615	-68.8033	-68.7615	-68.8033	-68.7615	-68.7615	-68.7615	-68.7615	-68.7615	-68.7615	-68.7615	-68.7615	-68.8033	22.4312	22.1869	22.7474	23.0306
2008-03-18 03:20:20	12.8632	21.6705	22.3948	22.5699	22.4998	22.3249	22.3249	22.4998	22.4998	22.4647	22.5348	22.4647	22.3948	22.3249	22.4823	22.6755	-68.7615	-68.7615	-68.8033	-68.7615	-68.8033	-68.7615	-68.8033	-68.8033	-68.7615	-68.7615	-68.7615	-68.8033	-68.8033	-68.7615	-68.7615	-68.8033	-68.7615	-68.7615	-68.8033	-68.7615	-68.7615	-68.7615	-68.7615	22.4296	22.1855	22.7107	22.9936
2008-03-18 03:20:40	12.8634	21.6705	22.392	22.5672	22.4969	22.3221	22.3396	22.4969	22.4969	22.462	22.5321	22.462	22.392	22.3221	22.462	22.6726	-68.7615	-68.7615	-68.7197	-68.8033	-68.7615	-68.8033	-68.7615	-68.7615	-68.8033	-68.7615	-68.7615	-68.7615	-68.8033	-68.8033	-68.7615	-68.8033	-68.8033	-68.7615	-68.7615	-68.7615	-68.7615	-68.7615	-68.7615	22.427	22.1828	22.7079	22.9908
2008-03-18 03:21:00	12.8689	21.6705	22.392	22.5672	22.4969	22.3221	22.3396	22.4969	22.4969	22.462	22.5321	22.462	22.392	22.3221	22.4794	22.6726	-68.8033	-68.7615	-68.7615	-68.8033	-68.7615	-68.8033	-68.7615	-68.7615	-68.7615	-68.7615	-68.7615	-68.7615	-68.8033	-68.7615	-68.8033	-68.8033	-68.7615	-68.7615	-68.7615	-68.8033	-68.8033	-68.7615	-68.7615	22.427	22.1828	22.6726	22.9553
2008-03-18 03:21:20	12.8632	21.6976	22.3897	22.5649	22.4947	22.3199	22.3374	22.4947	22.4947	22.4597	22.5473	22.4423	22.3897	22.3374	22.4947	22.6704	-68.8033	-68.8033	-68.7615	-68.7615	-68.8033	-68.7615	-68.7197	-68.7615	-68.7615	-68.7615	-68.7615	-68.7615	-68.7615	-68.8033	-68.7615	-68.7615	-68.7615	-68.7615	-68.8033	-68.7615	-68.7615	-68.8033	-68.8033	22.4247	22.1806	22.6704	22.9531
2008-03-18 03:21:40	12.863	21.6976	22.388	22.5631	22.4929	22.3181	22.3531	22.5105	22.4929	22.4579	22.528	22.4579	22.388	22.3181	22.4929	22.6686	-68.8033	-68.8033	-68.8033	-68.8033	-68.7615	-68.7615	-68.8033	-68.7615	-68.8033	-68.7615	-68.7615	-68.8033	-68.7615	-68.7615	-68.8033	-68.7615	-68.7615	-68.7615	-68.8033	-68.7615	-68.7615	-68.8033	-68.8033	22.423	22.1788	22.6686	22.9158
2008-03-18 03:22:00	12.863	21.7247	22.388	22.5631	22.4929	22.3181	22.3356	22.4929	22.4929	22.4579	22.528	22.4579	22.388	22.3181	22.4929	22.6686	-68.7615	-68.8033	-68.7615	-68.8033	-68.8033	-68.7615	-68.8033	-68.7615	-68.8033	-68.7615	-68.7615	-68.7615	-68.7615	-68.7615	-68.7615	-68.7197	-68.8033	-68.7615	-68.8033	-68.7615	-68.7615	-68.7615	-68.8033	22.423	22.1788	22.6334	22.9158
2008-03-18 03:22:20	12.8633	21.7247	22.3882	22.5633	22.4932	22.3183	22.3358	22.5282	22.4932	22.4581	22.5458	22.4581	22.3882	22.3358	22.4932	22.6689	-68.7615	-68.7615	-68.7615	-68.7615	-68.7615	-68.7615	-68.7615	-68.7615	-68.7615	-68.7615	-68.8033	-68.8033	-68.8033	-68.7615	-68.8033	-68.8033	-68.7615	-68.7615	-68.7615	-68.7615	-68.8033	-68.8033	-68.7615	22.4231	22.179	22.6336	22.8806
2008-03-18 03:22:40	12.8633	21.7247	22.3882	22.5633	22.4932	22.3183	22.3358	22.5107	22.4932	22.4581	22.5282	22.4581	22.3882	22.3358	22.4932	22.6689	-68.7615	-68.8033	-68.8033	-68.7615	-68.8033	-68.7615	-68.7615	-68.7615	-68.7615	-68.8033	-68.8033	-68.7615	-68.7615	-68.8033	-68.7615	-68.7615	-68.7615	-68.8033	-68.8033	-68.7615	-68.7615	-68.7615	-68.7615	22.4231	22.179	22.6336	22.8806
2008-03-18 03:23:00	12.863	21.7518	22.3867	22.5619	22.5092	22.3168	22.3518	22.5268	22.4917	22.4567	22.5268	22.4567	22.3867	22.3343	22.4917	22.6673	-68.7615	-68.8033	-68.8033	-68.8033	-68.7615	-68.7615	-68.8033	-68.7615	-68.7615	-68.8033	-68.8033	-68.7615	-68.8033	-68.7615	-68.7615	-68.7615	-68.8033	-68.7615	-68.7615	-68.8033	-68.7615	-68.8033	-68.7615	22.4392	22.1776	22.597	22.8791
2008-03-18 03:23:20	12.8629	21.7518	22.3872	22.5798	22.5097	22.3174	22.3522	22.5272	22.5097	22.4747	22.5448	22.4571	22.3872	22.3348	22.4921	22.6677	-68.7615	-68.7615	-68.8033	-68.7615	-68.7615	-68.7615	-68.8033	-68.7615	-68.7615	-68.8033	-68.7615	-68.8033	-68.7615	-68.7615	-68.7615	-68.7615	-68.7615	-68.7615	-68.7615	-68.8033	-68.7615	-68.7615	-68.7615	22.4397	22.178	22.5974	22.8619
2008-03-18 03:23:40	12.8629	21.7812	22.3872	22.5623	22.4921	22.3174	22.3522	22.5272	22.4921	22.4571	22.5448	22.4571	22.3872	22.3522	22.4921	22.6677	-68.7615	-68.7615	-68.7197	-68.7615	-68.7615	-68.8033	-68.8033	-68.7615	-68.8033	-68.8033	-68.7615	-68.7615	-68.7615	-68.8033	-68.7615	-68.7615	-68.8033	-68.7615	-68.7615	-68.7615	-68.7615	-68.8033	-68.7615	22.4571	22.178	22.5974	22.8442
2008-03-18 03:24:00	12.8627	21.7812	22.3859	22.561	22.4909	22.3161	22.3335	22.5259	22.4909	22.4733	22.5435	22.4559	22.3859	22.3335	22.4909	22.6665	-68.7615	-68.7615	-68.7615	-68.7615	-68.7615	-68.7615	-68.7615	-68.7615	-68.7615	-68.7615	-68.8033	-68.8033	-68.7615	-68.7615	-68.7615	-68.8033	-68.7615	-68.7615	-68.7615	-68.7615	-68.8033	-68.7615	-68.7615	22.4209	22.1768	22.561	22.8076
2008-03-18 03:24:20	12.8626	21.7812	22.3865	22.5792	22.4915	22.3167	22.3516	22.5266	22.4915	22.4741	22.5266	22.4565	22.3865	22.3516	22.4915	22.6672	-68.7615	-68.7615	-68.8033	-68.8033	-68.8033	-68.7615	-68.7615	-68.7615	-68.7615	-68.7615	-68.7615	-68.7615	-68.7615	-68.8033	-68.7615	-68.7615	-68.7615	-68.8033	-68.7615	-68.7615	-68.7615	-68.7615	-68.7615	22.439	22.1774	22.5618	22.8083
2008-03-18 03:24:40	12.8626	21.8083	22.3865	22.5792	22.5091	22.3167	22.3516	22.5266	22.4915	22.4741	22.5442	22.4565	22.3865	22.3516	22.4915	22.6672	-68.7615	-68.7615	-68.7615	-68.8033	-68.7615	-68.7615	-68.7615	-68.7615	-68.7615	-68.7615	-68.8033	-68.7615	-68.8033	-68.8033	-68.8033	-68.8033	-68.7615	-68.7615	-68.7615	-68.7615	-68.7615	-68.8033	-68.7615	22.439	22.1774	22.5618	22.8083
2008-03-18 03:25:00	12.8625	21.8083	22.3854	22.5781	22.5254	22.3156	22.3505	22.5079	22.5079	22.4728	22.5606	22.4554	22.3854	22.3505	22.4905	22.666	-68.7615	-68.7615	-68.7615	-68.7615	-68.7615	-68.7615	-68.7615	-68.8033	-68.8033	-68.7615	-68.7615	-68.7615	-68.7615	-68.8033	-68.7615	-68.7615	-68.7615	-68.8033	-68.8033	-68.7615	-68.7615	-68.8033	-68.8033	22.4378	22.1762	22.5431	22.8071
2008-03-18 03:25:20	12.8625	21.8354	22.3854	22.5781	22.5254	22.3156	22.3505	22.5254	22.5079	22.4905	22.5431	22.4554	22.3854	22.3505	22.4905	22.666	-68.7615	-68.8033	-68.7615	-68.8033	-68.7615	-68.8033	-68.8033	-68.8033	-68.8033	-68.7615	-68.7615	-68.8033	-68.7615	-68.8033	-68.8033	-68.7615	-68.8033	-68.7615	-68.7615	-68.7615	-68.8033	-68.8033	-68.7615	22.4378	22.1762	22.5254	22.7718
2008-03-18 03:25:40	12.8625	21.8354	22.3845	22.5772	22.5246	22.3321	22.3495	22.507	22.5246	22.472	22.5596	22.4545	22.3845	22.3495	22.4895	22.6651	-68.7615	-68.7615	-68.7615	-68.7615	-68.7615	-68.8033	-68.7615	-68.7615	-68.7615	-68.7615	-68.7615	-68.7197	-68.7615	-68.7615	-68.8033	-68.7615	-68.7615	-68.7615	-68.7615	-68.8033	-68.7615	-68.7615	-68.7615	22.4545	22.1754	22.5246	22.7708
2008-03-18 03:26:00	12.8624	21.8083	22.3838	22.594	22.5238	22.3314	22.3488	22.5238	22.5063	22.4713	22.5588	22.4537	22.3838	22.3488	22.4888	22.6644	-68.7615	-68.8033	-68.7615	-68.7615	-68.7615	-68.8033	-68.7615	-68.8033	-68.7615	-68.8033	-68.7615	-68.7615	-68.7615	-68.8033	-68.7615	-68.8033	-68.7615	-68.7615	-68.8033	-68.7615	-68.8033	-68.8033	-68.8033	22.4537	22.192	22.5238	22.7701
2008-03-18 03:26:20	12.8624	21.8625	22.3838	22.5764	22.5238	22.3314	22.3488	22.5063	22.4888	22.4888	22.5588	22.4537	22.3838	22.3488	22.4888	22.6644	-68.8033	-68.7615	-68.7615	-68.8033	-68.7615	-68.8033	-68.8033	-68.8033	-68.8033	-68.7615	-68.8033	-68.7615	-68.7615	-68.7615	-68.8033	-68.7615	-68.7615	-68.7615	-68.7615	-68.7615	-68.8033	-68.7615	-68.8033	22.4537	22.192	22.5238	22.7701
2008-03-18 03:26:40	12.8624	21.8354	22.3832	22.5759	22.5232	22.3308	22.3482	22.5232	22.5232	22.4882	22.5582	22.4532	22.3832	22.3482	22.4882	22.6814	-68.7615	-68.7615	-68.7615	-68.8033	-68.8033	-68.7615	-68.7615	-68.7615	-68.7615	-68.7615	-68.8033	-68.7615	-68.7615	-68.7615	-68.7615	-68.7615	-68.8033	-68.7615	-68.7615	-68.7615	-68.7615	-68.7615	-68.7615	22.4532	22.2089	22.5232	22.7695
2008-03-18 03:27:00	12.8623	21.8625	22.3844	22.5595	22.5245	22.3494	22.3494	22.5245	22.5069	22.4893	22.5595	22.4543	22.3844	22.3494	22.4893	22.665	-68.8033	-68.7615	-68.8033	-68.8033	-68.7615	-68.8033	-68.7615	-68.8033	-68.8033	-68.8033	-68.7615	-68.7615	-68.7615	-68.8033	-68.7615	-68.7615	-68.7615	-68.7615	-68.8033	-68.7615	-68.8033	-68.7615	-68.8033	22.4543	22.21	22.5245	22.7354
2008-03-18 03:27:20	12.8623	21.8625	22.3844	22.577	22.5245	22.3494	22.3494	22.5245	22.5069	22.4893	22.5595	22.4543	22.3844	22.3494	22.4893	22.665	-68.8033	-68.7615	-68.7615	-68.8033	-68.7615	-68.8033	-68.8033	-68.8033	-68.8033	-68.7615	-68.7615	-68.7615	-68.8033	-68.7615	-68.7615	-68.7615	-68.7615	-68.7615	-68.8033	-68.8033	-68.8033	-68.7615	-68.8033	22.4543	22.21	22.5245	22.7354
2008-03-18 03:27:40	12.8623	21.8625	22.3836	22.5588	22.5237	22.3488	22.3488	22.5237	22.5062	22.4887	22.5588	22.4537	22.3836	22.3488	22.4887	22.6643	-68.7615	-68.8033	-68.7615	-68.7615	-68.8033	-68.8033	-68.7615	-68.8033	-68.7615	-68.8033	-68.7615	-68.8033	-68.8033	-68.7615	-68.8033	-68.8033	-68.7615	-68.7615	-68.7615	-68.7615	-68.7615	-68.8033	-68.7615	22.4537	22.2093	22.4887	22.7347
2008-03-18 03:28:00	12.8623	21.8897	22.3836	22.5588	22.5237	22.3488	22.3488	22.5237	22.5237	22.4887	22.5588	22.4537	22.4011	22.3488	22.4887	22.6643	-68.7615	-68.7615	-68.8033	-68.7615	-68.7615	-68.7615	-68.7615	-68.7615	-68.7615	-68.7615	-68.7615	-68.7615	-68.8033	-68.7615	-68.7615	-68.7615	-68.7615	-68.7615	-68.7615	-68.7615	-68.8033	-68.7615	-68.8033	22.4537	22.2093	22.4887	22.7347
2008-03-18 03:28:20	12.8677	21.8897	22.3831	22.5582	22.5231	22.3481	22.3481	22.5231	22.5056	22.4881	22.5582	22.453	22.3831	22.3481	22.4881	22.6636	-68.7615	-68.8033	-68.7615	-68.8033	-68.7615	-68.7615	-68.7615	-68.7615	-68.7615	-68.7615	-68.7615	-68.8033	-68.8033	-68.7615	-68.8033	-68.8033	-68.7615	-68.7615	-68.7615	-68.8033	-68.8033	-68.7615	-68.8033	22.453	22.2087	22.4881	22.7341
2008-03-18 03:28:40	12.8623	21.919	22.4001	22.5578	22.5227	22.3477	22.3477	22.5227	22.5227	22.4877	22.5578	22.4526	22.3826	22.3477	22.5051	22.6808	-68.7615	-68.7615	-68.7615	-68.7615	-68.8033	-68.8033	-68.7615	-68.8033	-68.7615	-68.8033	-68.7197	-68.8033	-68.7615	-68.8033	-68.7615	-68.7615	-68.7615	-68.7615	-68.7615	-68.7615	-68.7615	-68.7615	-68.7615	22.4526	22.2083	22.4877	22.7337
2008-03-18 03:29:00	12.8677	21.919	22.3826	22.5578	22.5227	22.3477	22.3477	22.5227	22.5227	22.4877	22.5578	22.4526	22.3826	22.3477	22.5051	22.6985	-68.8033	-68.8033	-68.7615	-68.7615	-68.8033	-68.7615	-68.8033	-68.7615	-68.7615	-68.8033	-68.7615	-68.7615	-68.8033	-68.8033	-68.8033	-68.7615	-68.8033	-68.8033	-68.7615	-68.7615	-68.8033	-68.8033	-68.8033	22.4526	22.2083	22.4877	22.6985
2008-03-18 03:29:20	12.8677	21.9732	22.4015	22.559	22.5239	22.3489	22.3489	22.5239	22.5239	22.489	22.5766	22.4714	22.4015	22.3489	22.489	22.6821	-68.7615	-68.8033	-68.7615	-68.8033	-68.7615	-68.7615	-68.7615	-68.7615	-68.7615	-68.8033	-68.7615	-68.7615	-68.7615	-68.7615	-68.7615	-68.7615	-68.8033	-68.7615	-68.7615	-68.7615	-68.7615	-68.8033	-68.7615	22.4539	22.2096	22.4539	22.6998
2008-03-18 03:29:40	12.8677	21.9461	22.3833	22.5936	22.5233	22.3484	22.3659	22.5233	22.5233	22.4883	22.5584	22.4533	22.4183	22.3659	22.5233	22.6815	-68.8033	-68.8033	-68.7615	-68.7615	-68.7615	-68.7615	-68.7615	-68.7615	-68.8033	-68.7615	-68.7615	-68.8033	-68.8033	-68.8033	-68.7615	-68.7615	-68.7615	-68.7615	-68.7615	-68.8033	-68.8033	-68.7615	-68.8033	22.4533	22.2089	22.4533	22.6991
2008-03-18 03:30:00	12.8677	21.9461	22.4007	22.576	22.5233	22.3484	22.3659	22.5233	22.5059	22.4883	22.576	22.4708	22.4007	22.3484	22.5233	22.6639	-68.7615	-68.7615	-68.7615	-68.7615	-68.7615	-68.8033	-68.8033	-68.8033	-68.8033	-68.8033	-68.7615	-68.7615	-68.7615	-68.8033	-68.7615	-68.8033	-68.8033	-68.7615	-68.8033	-68.7615	-68.8033	-68.7615	-68.7615	22.4533	22.2089	22.4533	22.6991
2008-03-18 03:30:20	12.8622	22.0004	22.4003	22.5756	22.5229	22.3479	22.3654	22.5229	22.5229	22.4878	22.5931	22.4878	22.4178	22.3654	22.5229	22.6986	-68.7615	-68.7615	-68.7615	-68.7615	-68.7615	-68.8033	-68.7615	-68.7615	-68.7615	-68.7615	-68.8033	-68.7615	-68.7615	-68.7615	-68.8033	-68.7615	-68.7615	-68.7615	-68.7615	-68.7615	-68.7615	-68.7615	-68.7615	22.4528	22.2085	22.4528	22.6986
2008-03-18 03:30:40	12.8622	22.0004	22.4178	22.5931	22.5229	22.3479	22.3654	22.5229	22.5229	22.4878	22.5931	22.4878	22.4178	22.3828	22.5229	22.6986	-68.7615	-68.7615	-68.8033	-68.7615	-68.7615	-68.8033	-68.7615	-68.7615	-68.8033	-68.7615	-68.8033	-68.8033	-68.7615	-68.7615	-68.7615	-68.7615	-68.7615	-68.7615	-68.7615	-68.8033	-68.7615	-68.8033	-68.7615	22.4528	22.2085	22.4528	22.6986
2008-03-18 03:31:00	12.8622	22.0004	22.419	22.5768	22.5242	22.3491	22.3841	22.5242	22.5242	22.4891	22.5944	22.4891	22.419	22.3841	22.5242	22.6999	-68.7615	-68.7615	-68.8033	-68.7615	-68.8033	-68.7615	-68.7615	-68.8033	-68.7615	-68.7615	-68.7615	-68.8033	-68.7615	-68.7615	-68.8033	-68.7615	-68.7615	-68.7615	-68.7615	-68.7615	-68.8033	-68.8033	-68.7615	22.4541	22.2097	22.4541	22.6999
2008-03-18 03:31:20	12.8626	22.0297	22.4184	22.576	22.5234	22.3484	22.3834	22.5234	22.5234	22.4884	22.5937	22.4884	22.4184	22.3834	22.5234	22.6992	-68.7615	-68.7615	-68.8033	-68.7615	-68.8033	-68.7615	-68.7615	-68.8033	-68.7615	-68.8033	-68.7615	-68.7615	-68.7615	-68.8033	-68.8033	-68.7615	-68.8033	-68.7615	-68.7615	-68.7615	-68.7615	-68.7615	-68.7615	22.4884	22.2091	22.4534	22.6992
2008-03-18 03:31:40	12.8626	22.0568	22.4184	22.5937	22.5234	22.3484	22.3834	22.5234	22.5234	22.5059	22.5937	22.4884	22.4184	22.3834	22.5234	22.6992	-68.7615	-68.8033	-68.7615	-68.7615	-68.7615	-68.7615	-68.8033	-68.7615	-68.7615	-68.7615	-68.8033	-68.7615	-68.8033	-68.7615	-68.7615	-68.8033	-68.7615	-68.8033	-68.8033	-68.7615	-68.7615	-68.8033	-68.8033	22.4884	22.2265	22.4534	22.6992
2008-03-18 03:32:00	12.868	22.0568	22.4195	22.5948	22.5246	22.3496	22.3846	22.5246	22.5246	22.5071	22.5948	22.4895	22.4195	22.3846	22.5246	22.7003	-68.7615	-68.8033	-68.7615	-68.7615	-68.7615	-68.7615	-68.7615	-68.7615	-68.7615	-68.8033	-68.7615	-68.8033	-68.8033	-68.7615	-68.7615	-68.8033	-68.7615	-68.8033	-68.7615	-68.8033	-68.7615	-68.7615	-68.7615	22.4895	22.245	22.437	22.7003
2008-03-18 03:32:20	12.8734	22.0568	22.4187	22.5941	22.5239	22.3489	22.3838	22.5414	22.5239	22.5239	22.5941	22.4888	22.4187	22.3838	22.5239	22.6996	-68.7615	-68.7615	-68.7615	-68.8033	-68.8033	-68.7615	-68.7615	-68.8033	-68.7615	-68.7615	-68.8033	-68.7615	-68.7615	-68.8033	-68.7615	-68.7615	-68.7615	-68.8033	-68.8033	-68.7615	-68.8033	-68.7615	-68.8033	22.4888	22.2443	22.4362	22.6996
2008-03-18 03:32:40	12.868	22.084	22.4187	22.5941	22.5239	22.3489	22.3838	22.5239	22.5239	22.5063	22.5941	22.4888	22.4187	22.3838	22.5239	22.7172	-68.7615	-68.7615	-68.7615	-68.7615	-68.7615	-68.7615	-68.7615	-68.7615	-68.8033	-68.7615	-68.8033	-68.7615	-68.7615	-68.7615	-68.7615	-68.7615	-68.8033	-68.7615	-68.7615	-68.8033	-68.7615	-68.7615	-68.7615	22.4888	22.2443	22.4362	22.6996
2008-03-18 03:33:00	12.8683	22.084	22.4198	22.5951	22.5249	22.3499	22.3848	22.5424	22.5249	22.5249	22.5951	22.4898	22.4373	22.3848	22.5249	22.7183	-68.7615	-68.7615	-68.7615	-68.7615	-68.7615	-68.7615	-68.7615	-68.7615	-68.8033	-68.7615	-68.7615	-68.8033	-68.8033	-68.8033	-68.7615	-68.7615	-68.7615	-68.7615	-68.7615	-68.8033	-68.7615	-68.7615	-68.8033	22.4898	22.2453	22.4373	22.7006
2008-03-18 03:33:20	12.8683	22.1133	22.4198	22.5951	22.5249	22.3674	22.3848	22.56	22.5249	22.5249	22.5951	22.4898	22.4373	22.3848	22.5249	22.7359	-68.7615	-68.8033	-68.8033	-68.8033	-68.7615	-68.7615	-68.7615	-68.7615	-68.7615	-68.8033	-68.8033	-68.7615	-68.7615	-68.7615	-68.7615	-68.7615	-68.7615	-68.8033	-68.7615	-68.7615	-68.7615	-68.8033	-68.7615	22.4898	22.2453	22.4198	22.7006
2008-03-18 03:33:40	12.8627	22.1133	22.419	22.5943	22.5417	22.384	22.384	22.5592	22.5241	22.5066	22.5943	22.489	22.454	22.384	22.5241	22.7351	-68.7615	-68.7615	-68.7615	-68.8033	-68.7615	-68.7615	-68.7615	-68.7615	-68.7615	-68.8033	-68.7615	-68.8033	-68.7615	-68.7615	-68.7615	-68.7615	-68.7615	-68.7615	-68.7615	-68.8033	-68.7615	-68.7615	-68.7615	22.489	22.2445	22.419	22.6999
2008-03-18 03:34:00	12.8626	22.1133	22.4358	22.5937	22.5411	22.3834	22.3834	22.5585	22.5235	22.5059	22.5937	22.5059	22.4534	22.3834	22.5235	22.7344	-68.7615	-68.7615	-68.7615	-68.8033	-68.8033	-68.8033	-68.8033	-68.8033	-68.7615	-68.7615	-68.8033	-68.7615	-68.8033	-68.7615	-68.7615	-68.7615	-68.8033	-68.8033	-68.7615	-68.8033	-68.7615	-68.8033	-68.7615	22.4884	22.2438	22.4534	22.6992
2008-03-18 03:34:20	12.8681	22.1404	22.4358	22.5937	22.5585	22.3834	22.3834	22.5585	22.5235	22.5235	22.5937	22.5059	22.4534	22.3834	22.5235	22.7344	-68.8033	-68.8033	-68.7615	-68.8033	-68.7615	-68.7615	-68.7615	-68.7615	-68.7615	-68.7615	-68.7615	-68.8033	-68.8033	-68.7615	-68.7615	-68.7615	-68.7615	-68.8033	-68.7615	-68.7615	-68.7615	-68.7615	-68.7615	22.4884	22.2438	22.4183	22.6992
2008-03-18 03:34:40	12.868	22.1404	22.4529	22.5932	22.558	22.3654	22.3829	22.558	22.5229	22.5229	22.5932	22.5054	22.4354	22.3829	22.5229	22.7339	-68.7615	-68.7615	-68.7615	-68.8033	-68.7615	-68.7197	-68.7615	-68.8033	-68.7615	-68.7615	-68.7615	-68.8033	-68.7615	-68.7615	-68.7615	-68.8033	-68.8033	-68.7615	-68.7615	-68.8033	-68.7615	-68.7615	-68.7615	22.5054	22.2433	22.4529	22.6987
2008-03-18 03:35:00	12.8684	22.1675	22.4525	22.5927	22.5401	22.3825	22.3825	22.5576	22.5226	22.5226	22.5927	22.5051	22.4525	22.3825	22.5226	22.7335	-68.7615	-68.7615	-68.8033	-68.8033	-68.7615	-68.8033	-68.7615	-68.8033	-68.7615	-68.8033	-68.7615	-68.7615	-68.7615	-68.8033	-68.8033	-68.7615	-68.7615	-68.7615	-68.7615	-68.7615	-68.8033	-68.8033	-68.8033	22.5226	22.2429	22.4525	22.6982
2008-03-18 03:35:20	12.8684	22.1675	22.4525	22.5927	22.5576	22.3825	22.3825	22.5576	22.5226	22.5226	22.5927	22.5051	22.4525	22.3825	22.5226	22.7335	-68.7615	-68.7615	-68.7615	-68.7615	-68.8033	-68.8033	-68.7615	-68.7615	-68.7615	-68.8033	-68.7615	-68.7615	-68.8033	-68.7615	-68.7615	-68.7615	-68.8033	-68.8033	-68.7615	-68.7615	-68.7615	-68.8033	-68.7615	22.5051	22.2429	22.4525	22.6982
2008-03-18 03:35:40	12.8627	22.1675	22.4521	22.5924	22.5573	22.3821	22.3821	22.5573	22.5223	22.5223	22.5924	22.5223	22.4521	22.3821	22.5223	22.7332	-68.7615	-68.7615	-68.8033	-68.7615	-68.8033	-68.7615	-68.7615	-68.7615	-68.7615	-68.7615	-68.8033	-68.7615	-68.7615	-68.7615	-68.8033	-68.7615	-68.7615	-68.8033	-68.7615	-68.7615	-68.8033	-68.8033	-68.7615	22.5223	22.2427	22.4521	22.698
2008-03-18 03:36:00	12.8573	22.1947	22.4521	22.5924	22.5573	22.3821	22.3821	22.5573	22.5223	22.5223	22.61	22.5223	22.4521	22.3821	22.5397	22.7332	-68.7615	-68.7615	-68.7615	-68.7615	-68.7615	-68.7615	-68.7615	-68.7615	-68.8033	-68.7615	-68.7615	-68.7615	-68.7615	-68.7615	-68.7615	-68.7615	-68.8033	-68.7615	-68.7615	-68.7615	-68.7615	-68.7615	-68.8033	22.5223	22.2427	22.4521	22.698
2008-03-18 03:36:20	12.8681	22.1947	22.4551	22.5955	22.5603	22.3852	22.3852	22.5779	22.5252	22.5252	22.613	22.5252	22.4551	22.3852	22.5428	22.7362	-68.8033	-68.7615	-68.8033	-68.7615	-68.8033	-68.7615	-68.7615	-68.7615	-68.8033	-68.7615	-68.8033	-68.7615	-68.7615	-68.8033	-68.7615	-68.7197	-68.7615	-68.8033	-68.7615	-68.8033	-68.7615	-68.7615	-68.7615	22.5252	22.2456	22.4376	22.701
2008-03-18 03:36:40	12.8684	22.224	22.4559	22.5962	22.5611	22.3859	22.3859	22.5962	22.5259	22.5259	22.6138	22.5259	22.4559	22.3859	22.5435	22.737	-68.8033	-68.7615	-68.8033	-68.8033	-68.7615	-68.7615	-68.8033	-68.7615	-68.8033	-68.8033	-68.7615	-68.7615	-68.8033	-68.8033	-68.8033	-68.8033	-68.8033	-68.7615	-68.7615	-68.7615	-68.7615	-68.7615	-68.7615	22.5259	22.2464	22.4559	22.7017
2008-03-18 03:37:00	12.8684	22.224	22.4559	22.6138	22.5611	22.3859	22.4034	22.5787	22.5435	22.5259	22.6138	22.5259	22.4559	22.3859	22.5435	22.7547	-68.8033	-68.7615	-68.7615	-68.8033	-68.7615	-68.7615	-68.7615	-68.8033	-68.7615	-68.7615	-68.7615	-68.7615	-68.8033	-68.7615	-68.7615	-68.8033	-68.7615	-68.8033	-68.7615	-68.7615	-68.7615	-68.8033	-68.7615	22.5259	22.2464	22.4559	22.7017
2008-03-18 03:37:20	12.8683	22.224	22.4565	22.6143	22.5617	22.3865	22.4041	22.5968	22.5441	22.5266	22.632	22.5266	22.4565	22.3865	22.5617	22.7552	-68.7615	-68.7615	-68.8033	-68.7615	-68.7615	-68.8033	-68.8033	-68.8033	-68.7615	-68.7615	-68.7615	-68.8033	-68.7615	-68.7615	-68.8033	-68.7615	-68.7615	-68.8033	-68.7615	-68.7615	-68.8033	-68.8033	-68.7615	22.5266	22.247	22.4565	22.7024
2008-03-18 03:37:40	12.8682	22.2511	22.4554	22.6308	22.5605	22.3855	22.4204	22.5957	22.543	22.5255	22.6308	22.5255	22.4554	22.4204	22.5605	22.7718	-68.7615	-68.7615	-68.7197	-68.8033	-68.7615	-68.8033	-68.7615	-68.7615	-68.7615	-68.8033	-68.8033	-68.7615	-68.8033	-68.7615	-68.7615	-68.7615	-68.7615	-68.7615	-68.7615	-68.7615	-68.7615	-68.7615	-68.7615	22.5255	22.2459	22.4554	22.7013
2008-03-18 03:38:00	12.8627	22.2511	22.4554	22.6308	22.5781	22.3855	22.4204	22.5957	22.543	22.5255	22.6308	22.5255	22.4554	22.4029	22.5605	22.7718	-68.7615	-68.7615	-68.7615	-68.8033	-68.7615	-68.8033	-68.7615	-68.7615	-68.7615	-68.7615	-68.7615	-68.8033	-68.8033	-68.7615	-68.8033	-68.7615	-68.7615	-68.7615	-68.7615	-68.7615	-68.7615	-68.8033	-68.7615	22.5255	22.2459	22.4554	22.7013
2008-03-18 03:38:20	12.8681	22.2782	22.4562	22.6315	22.5789	22.3861	22.4211	22.5964	22.5612	22.5437	22.6315	22.5261	22.4562	22.4211	22.5612	22.7725	-68.7615	-68.7615	-68.7615	-68.8033	-68.7615	-68.7615	-68.8033	-68.7615	-68.7615	-68.7615	-68.8033	-68.7615	-68.8033	-68.7615	-68.8033	-68.7615	-68.7615	-68.7615	-68.8033	-68.8033	-68.8033	-68.8033	-68.7615	22.5261	22.2466	22.4562	22.702
2008-03-18 03:38:40	12.8735	22.2782	22.4562	22.6315	22.5789	22.3861	22.4211	22.5964	22.5612	22.5437	22.6315	22.5261	22.4562	22.4211	22.5612	22.7725	-68.8033	-68.8033	-68.7615	-68.7615	-68.7615	-68.7615	-68.7615	-68.7615	-68.7615	-68.7615	-68.8033	-68.7615	-68.8033	-68.8033	-68.7615	-68.8033	-68.8033	-68.7615	-68.7615	-68.8033	-68.7615	-68.7615	-68.7615	22.5261	22.2466	22.4562	22.702
2008-03-18 03:39:00	12.8684	22.3076	22.4551	22.6305	22.5953	22.3851	22.4201	22.5953	22.5601	22.5251	22.6305	22.5251	22.4551	22.4201	22.5777	22.7714	-68.8033	-68.8033	-68.7615	-68.8033	-68.7615	-68.7615	-68.8033	-68.7615	-68.7615	-68.8033	-68.8033	-68.7615	-68.7615	-68.7615	-68.7615	-68.8033	-68.8033	-68.7615	-68.8033	-68.7615	-68.7615	-68.8033	-68.7615	22.5426	22.2803	22.4551	22.7009
2008-03-18 03:39:20	12.8683	22.3076	22.4542	22.6297	22.5945	22.3843	22.4193	22.5945	22.5594	22.5243	22.6297	22.5243	22.4542	22.4193	22.5769	22.7706	-68.7615	-68.8033	-68.7615	-68.7615	-68.7615	-68.8033	-68.7615	-68.7615	-68.8033	-68.8033	-68.8033	-68.7615	-68.7615	-68.7615	-68.7615	-68.8033	-68.8033	-68.8033	-68.8033	-68.7615	-68.7615	-68.7615	-68.7615	22.5419	22.2796	22.4542	22.7
2008-03-18 03:39:40	12.8683	22.3076	22.4717	22.6297	22.5945	22.3843	22.4193	22.5945	22.5594	22.5243	22.6297	22.5243	22.4717	22.4193	22.5945	22.7706	-68.7615	-68.7615	-68.7615	-68.8033	-68.7615	-68.7615	-68.7615	-68.8033	-68.8033	-68.7615	-68.8033	-68.8033	-68.7615	-68.7615	-68.7615	-68.7615	-68.7615	-68.7615	-68.8033	-68.8033	-68.7615	-68.7615	-68.7615	22.5243	22.2796	22.4542	22.7
2008-03-18 03:40:00	12.8681	22.3347	22.471	22.629	22.5938	22.3836	22.436	22.5938	22.5586	22.5236	22.629	22.5236	22.471	22.4185	22.5762	22.7699	-68.7615	-68.8033	-68.7615	-68.8033	-68.8033	-68.8033	-68.7615	-68.7615	-68.7615	-68.7615	-68.8033	-68.7615	-68.7615	-68.8033	-68.7615	-68.7615	-68.8033	-68.7615	-68.8033	-68.8033	-68.8033	-68.8033	-68.8033	22.5412	22.2789	22.4535	22.7346
2008-03-18 03:40:20	12.868	22.3347	22.4705	22.6284	22.5933	22.383	22.418	22.5933	22.5582	22.5582	22.6284	22.5231	22.488	22.418	22.5933	22.7693	-68.8033	-68.7615	-68.7197	-68.8033	-68.7615	-68.8033	-68.7615	-68.7615	-68.8033	-68.7615	-68.8033	-68.8033	-68.7615	-68.8033	-68.8033	-68.7615	-68.7615	-68.7615	-68.7615	-68.7615	-68.7615	-68.7615	-68.7615	22.5582	22.2784	22.453	22.734
2008-03-18 03:40:40	12.868	22.3347	22.4705	22.646	22.5933	22.383	22.453	22.5933	22.5582	22.5406	22.6284	22.5231	22.488	22.418	22.5933	22.7693	-68.7615	-68.8033	-68.8033	-68.7615	-68.7615	-68.8033	-68.7615	-68.7197	-68.7615	-68.8033	-68.7615	-68.8033	-68.7615	-68.8033	-68.7615	-68.7615	-68.7615	-68.8033	-68.7615	-68.8033	-68.8033	-68.8033	-68.8033	22.5582	22.2784	22.453	22.7164
2008-03-18 03:41:00	12.868	22.3641	22.4876	22.6279	22.5928	22.3826	22.4526	22.5928	22.5577	22.5402	22.6279	22.5226	22.4876	22.4176	22.5928	22.7689	-68.8033	-68.7615	-68.8033	-68.8033	-68.8033	-68.7615	-68.7197	-68.7615	-68.7615	-68.7615	-68.7615	-68.7615	-68.8033	-68.7615	-68.7615	-68.7615	-68.7615	-68.8033	-68.7615	-68.8033	-68.7615	-68.7615	-68.7615	22.5577	22.2779	22.4526	22.7336
2008-03-18 03:41:20	12.8734	22.3641	22.4876	22.6279	22.5928	22.4	22.435	22.5928	22.5577	22.5577	22.6456	22.5226	22.4876	22.435	22.5928	22.7865	-68.7615	-68.7615	-68.8033	-68.7615	-68.8033	-68.7197	-68.7615	-68.7615	-68.7615	-68.7615	-68.7615	-68.8033	-68.7615	-68.7615	-68.7615	-68.8033	-68.7615	-68.7615	-68.7615	-68.7615	-68.7615	-68.7615	-68.7615	22.5577	22.2779	22.4526	22.7336
2008-03-18 03:41:40	12.8679	22.3912	22.4872	22.6452	22.5925	22.3998	22.4522	22.5925	22.5573	22.5573	22.6628	22.5222	22.4872	22.4346	22.5925	22.7862	-68.8033	-68.7615	-68.7615	-68.7615	-68.8033	-68.7615	-68.8033	-68.8033	-68.7615	-68.7615	-68.7615	-68.7615	-68.7615	-68.7615	-68.8033	-68.7615	-68.7615	-68.7615	-68.7615	-68.8033	-68.7615	-68.7615	-68.7615	22.5573	22.2776	22.4522	22.7156
2008-03-18 03:42:00	12.8679	22.3912	22.487	22.645	22.5922	22.382	22.4519	22.5922	22.557	22.557	22.6626	22.5395	22.487	22.4345	22.5922	22.7682	-68.7615	-68.7615	-68.7615	-68.7615	-68.7615	-68.7615	-68.7615	-68.7615	-68.8033	-68.7615	-68.7615	-68.8033	-68.7615	-68.7615	-68.7615	-68.7615	-68.7615	-68.7615	-68.7615	-68.7197	-68.8033	-68.7615	-68.7615	22.557	22.2947	22.4519	22.733
2008-03-18 03:42:20	12.8733	22.4183	22.487	22.645	22.5922	22.382	22.4519	22.5922	22.5746	22.557	22.6626	22.5395	22.487	22.4519	22.5922	22.8036	-68.8033	-68.8033	-68.8033	-68.8033	-68.8033	-68.7615	-68.8033	-68.7615	-68.7615	-68.8033	-68.7615	-68.8033	-68.7615	-68.7615	-68.7615	-68.7615	-68.8033	-68.7615	-68.7615	-68.7615	-68.8033	-68.7615	-68.8033	22.557	22.2773	22.4519	22.7154
2008-03-18 03:42:40	12.8678	22.4183	22.4867	22.6447	22.5921	22.3992	22.4517	22.6096	22.5569	22.5569	22.6623	22.5393	22.4867	22.4517	22.5921	22.8034	-68.7615	-68.7615	-68.7615	-68.7615	-68.7615	-68.8033	-68.8033	-68.7615	-68.7615	-68.8033	-68.8033	-68.7615	-68.8033	-68.8033	-68.7615	-68.7615	-68.8033	-68.8033	-68.8033	-68.7615	-68.7615	-68.7615	-68.8033	22.5569	22.3119	22.4517	22.7328
2008-03-18 03:43:00	12.8733	22.4183	22.4865	22.6621	22.5918	22.399	22.4515	22.6269	22.5742	22.5567	22.6621	22.5567	22.4865	22.4515	22.5918	22.8032	-68.7615	-68.7615	-68.7615	-68.8033	-68.7615	-68.8033	-68.7615	-68.8033	-68.7615	-68.7197	-68.7615	-68.7615	-68.7615	-68.7615	-68.7615	-68.8033	-68.7615	-68.7615	-68.7615	-68.7615	-68.7615	-68.8033	-68.7615	22.5742	22.3117	22.4515	22.7327
2008-03-18 03:43:20	12.8733	22.4477	22.4865	22.6621	22.5918	22.399	22.4515	22.6269	22.5742	22.5567	22.6621	22.5567	22.4865	22.4515	22.5918	22.8032	-68.7615	-68.8033	-68.7615	-68.7615	-68.7197	-68.8033	-68.8033	-68.7615	-68.8033	-68.7615	-68.7615	-68.7615	-68.7615	-68.7615	-68.7615	-68.8033	-68.7615	-68.8033	-68.7615	-68.8033	-68.7615	-68.8033	-68.8033	22.5742	22.2943	22.4515	22.7327
2008-03-18 03:43:40	12.8678	22.4477	22.488	22.6636	22.5933	22.418	22.453	22.6285	22.5933	22.5582	22.6636	22.5582	22.5056	22.453	22.5933	22.8047	-68.7615	-68.7615	-68.7615	-68.8033	-68.7615	-68.8033	-68.7615	-68.7615	-68.7615	-68.7615	-68.8033	-68.8033	-68.7615	-68.7615	-68.7615	-68.7615	-68.7615	-68.7615	-68.8033	-68.7615	-68.7615	-68.7615	-68.8033	22.5933	22.3132	22.453	22.7341
2008-03-18 03:44:00	12.8678	22.4477	22.488	22.6636	22.5933	22.418	22.453	22.6285	22.5933	22.5582	22.6636	22.5582	22.5056	22.453	22.5933	22.8047	-68.7615	-68.7615	-68.8033	-68.8033	-68.7615	-68.7615	-68.8033	-68.7615	-68.7615	-68.7615	-68.7615	-68.7615	-68.7615	-68.7615	-68.7615	-68.7615	-68.8033	-68.7615	-68.8033	-68.7615	-68.7615	-68.7615	-68.8033	22.5933	22.3132	22.4705	22.7341
2008-03-18 03:44:20	12.8677	22.4748	22.5051	22.6632	22.5928	22.4176	22.4526	22.6281	22.5928	22.5577	22.6632	22.5577	22.5226	22.4526	22.5928	22.8042	-68.7615	-68.8033	-68.7615	-68.8033	-68.7615	-68.7615	-68.8033	-68.7615	-68.7615	-68.7615	-68.7615	-68.7615	-68.7615	-68.8033	-68.7615	-68.8033	-68.8033	-68.7615	-68.8033	-68.8033	-68.8033	-68.8033	-68.7615	22.5928	22.3128	22.4876	22.7336
2008-03-18 03:44:40	12.8677	22.4748	22.5047	22.6628	22.5925	22.4173	22.4522	22.6276	22.5925	22.5749	22.6628	22.5574	22.5223	22.4522	22.5925	22.8039	-68.7615	-68.7615	-68.7615	-68.8033	-68.7615	-68.8033	-68.7615	-68.8033	-68.7615	-68.8033	-68.7615	-68.7615	-68.7615	-68.8033	-68.7615	-68.7615	-68.8033	-68.7615	-68.7615	-68.7615	-68.8033	-68.7615	-68.7615	22.5925	22.3125	22.4873	22.7333
2008-03-18 03:45:00	12.8677	22.4748	22.5223	22.6628	22.5925	22.4173	22.4522	22.6276	22.5925	22.5749	22.6628	22.5574	22.5223	22.4522	22.5925	22.8039	-68.7615	-68.8033	-68.7615	-68.7615	-68.7615	-68.8033	-68.7615	-68.8033	-68.7615	-68.7615	-68.7615	-68.7615	-68.8033	-68.7615	-68.7615	-68.8033	-68.7615	-68.7615	-68.7615	-68.8033	-68.7615	-68.7615	-68.7615	22.5925	22.3125	22.4873	22.7333
2008-03-18 03:45:20	12.8677	22.5019	22.5221	22.6626	22.6098	22.4169	22.4694	22.6274	22.5922	22.5922	22.6626	22.5747	22.5221	22.4519	22.5922	22.8035	-68.7615	-68.8033	-68.8033	-68.8033	-68.8033	-68.7615	-68.8033	-68.8033	-68.8033	-68.8033	-68.7615	-68.8033	-68.8033	-68.8033	-68.7615	-68.8033	-68.7615	-68.7615	-68.8033	-68.8033	-68.7615	-68.8033	-68.8033	22.5922	22.3122	22.487	22.733
2008-03-18 03:45:40	12.8732	22.5313	22.5218	22.6799	22.6096	22.4167	22.4867	22.6272	22.592	22.592	22.6623	22.5744	22.5218	22.4517	22.592	22.821	-68.8033	-68.7615	-68.8033	-68.8033	-68.7615	-68.8033	-68.7615	-68.8033	-68.7615	-68.7615	-68.8033	-68.7615	-68.8033	-68.7615	-68.7615	-68.8033	-68.7615	-68.7615	-68.7615	-68.8033	-68.7615	-68.7615	-68.8033	22.592	22.312	22.4867	22.7328
2008-03-18 03:46:00	12.8732	22.5313	22.5218	22.6623	22.6096	22.4167	22.4867	22.6272	22.592	22.592	22.6623	22.5744	22.5218	22.4517	22.6096	22.8387	-68.8033	-68.7615	-68.8033	-68.7615	-68.8033	-68.7615	-68.7615	-68.8033	-68.7615	-68.7197	-68.7615	-68.7615	-68.8033	-68.7615	-68.8033	-68.8033	-68.8033	-68.8033	-68.8033	-68.7615	-68.8033	-68.7615	-68.8033	22.592	22.312	22.4867	22.7328
2008-03-18 03:46:20	12.8622	22.5313	22.5217	22.6622	22.627	22.4165	22.4866	22.627	22.5918	22.5918	22.6622	22.5918	22.5217	22.4515	22.627	22.8385	-68.7615	-68.7615	-68.7615	-68.8033	-68.7615	-68.8033	-68.7615	-68.7615	-68.8033	-68.8033	-68.7615	-68.7615	-68.7615	-68.7615	-68.7615	-68.7615	-68.8033	-68.8033	-68.7615	-68.7615	-68.7615	-68.7615	-68.7615	22.5918	22.3118	22.4866	22.7325
2008-03-18 03:46:40	12.8732	22.5584	22.5217	22.6798	22.627	22.4165	22.4866	22.627	22.5918	22.5918	22.6622	22.5918	22.5217	22.4515	22.627	22.8385	-68.8033	-68.7615	-68.8033	-68.7615	-68.7615	-68.7615	-68.7615	-68.8033	-68.7615	-68.7615	-68.8033	-68.8033	-68.7197	-68.7615	-68.7197	-68.7615	-68.7615	-68.7615	-68.7615	-68.8033	-68.8033	-68.8033	-68.8033	22.5918	22.3118	22.4866	22.7325
2008-03-18 03:47:00	12.8677	22.5584	22.5231	22.6636	22.6285	22.418	22.488	22.6285	22.5933	22.5933	22.6812	22.5933	22.5231	22.453	22.6285	22.84	-68.8033	-68.7615	-68.8033	-68.7615	-68.7197	-68.7615	-68.8033	-68.7615	-68.8033	-68.8033	-68.7615	-68.8033	-68.8033	-68.7615	-68.8033	-68.7615	-68.7615	-68.8033	-68.8033	-68.7615	-68.8033	-68.7615	-68.8033	22.5933	22.3132	22.5056	22.7341
2008-03-18 03:47:20	12.8732	22.5584	22.5226	22.6808	22.6281	22.4176	22.4876	22.6456	22.5928	22.5928	22.6808	22.5928	22.5226	22.4701	22.6281	22.8396	-68.7615	-68.7615	-68.7615	-68.8033	-68.8033	-68.7615	-68.7615	-68.7615	-68.7615	-68.7615	-68.7615	-68.7615	-68.8033	-68.7615	-68.7615	-68.7615	-68.7615	-68.7615	-68.7615	-68.7615	-68.7615	-68.8033	-68.7615	22.5928	22.3128	22.5051	22.7336
2008-03-18 03:47:40	12.8732	22.5878	22.5226	22.6984	22.6281	22.4351	22.4876	22.6456	22.5928	22.5928	22.6808	22.5928	22.5226	22.4526	22.6281	22.8396	-68.8033	-68.8033	-68.7615	-68.7615	-68.7615	-68.7615	-68.7615	-68.7615	-68.7615	-68.7615	-68.7197	-68.7615	-68.7615	-68.7615	-68.7615	-68.7615	-68.7615	-68.7615	-68.8033	-68.7615	-68.7615	-68.8033	-68.7615	22.5928	22.3128	22.5226	22.7689
2008-03-18 03:48:00	12.8677	22.5878	22.5223	22.6981	22.6276	22.4522	22.4873	22.6628	22.5925	22.5925	22.6981	22.5925	22.5223	22.4697	22.6276	22.8392	-68.7615	-68.7615	-68.7615	-68.8033	-68.8033	-68.7615	-68.8033	-68.7615	-68.8033	-68.8033	-68.7197	-68.7615	-68.7615	-68.7615	-68.7615	-68.8033	-68.8033	-68.7615	-68.7615	-68.8033	-68.8033	-68.7615	-68.8033	22.5925	22.3125	22.5223	22.7686
2008-03-18 03:48:20	12.8677	22.6149	22.5221	22.6977	22.6274	22.4519	22.487	22.6626	22.5922	22.5922	22.6977	22.5922	22.5221	22.487	22.6274	22.8389	-68.8033	-68.7615	-68.7615	-68.8033	-68.7615	-68.7615	-68.8033	-68.7615	-68.7615	-68.8033	-68.8033	-68.7615	-68.7615	-68.8033	-68.7615	-68.8033	-68.7615	-68.7615	-68.8033	-68.7615	-68.7615	-68.8033	-68.7615	22.6274	22.3122	22.5045	22.7682
2008-03-18 03:48:40	12.8731	22.6149	22.5221	22.6977	22.6274	22.4519	22.5045	22.6626	22.5922	22.5922	22.6977	22.5922	22.5221	22.487	22.6274	22.8389	-68.7615	-68.7615	-68.7615	-68.7615	-68.8033	-68.7615	-68.7615	-68.7615	-68.7615	-68.7615	-68.7615	-68.8033	-68.7615	-68.8033	-68.7615	-68.7615	-68.7615	-68.8033	-68.8033	-68.8033	-68.8033	-68.7615	-68.8033	22.6274	22.3296	22.5221	22.7682
2008-03-18 03:49:00	12.8677	22.6149	22.5218	22.6975	22.6272	22.4517	22.4867	22.6623	22.592	22.592	22.6975	22.592	22.5218	22.4867	22.6272	22.8387	-68.8033	-68.7615	-68.8033	-68.7615	-68.8033	-68.8033	-68.7615	-68.8033	-68.7615	-68.8033	-68.7615	-68.7615	-68.7615	-68.7615	-68.8033	-68.7615	-68.7615	-68.7615	-68.7615	-68.7615	-68.8033	-68.7615	-68.7615	22.6272	22.3294	22.5218	22.7681
2008-03-18 03:49:20	12.8677	22.6442	22.5218	22.6975	22.6272	22.4342	22.5218	22.6623	22.6096	22.592	22.6975	22.592	22.5218	22.4867	22.6272	22.8564	-68.7615	-68.7615	-68.7615	-68.8033	-68.7615	-68.7615	-68.7615	-68.8033	-68.8033	-68.7615	-68.7615	-68.7615	-68.8033	-68.8033	-68.7197	-68.7615	-68.7615	-68.7615	-68.7615	-68.7615	-68.7615	-68.8033	-68.8033	22.6272	22.3294	22.5218	22.7681
2008-03-18 03:49:40	12.8677	22.6442	22.5217	22.6974	22.627	22.4515	22.5217	22.6622	22.5918	22.5918	22.6974	22.5918	22.5217	22.4866	22.627	22.8385	-68.7615	-68.7615	-68.8033	-68.7197	-68.7615	-68.7615	-68.7615	-68.8033	-68.7615	-68.8033	-68.7615	-68.8033	-68.8033	-68.8033	-68.7615	-68.8033	-68.7615	-68.8033	-68.7615	-68.7615	-68.7615	-68.7615	-68.7615	22.627	22.3466	22.5217	22.7679
2008-03-18 03:50:00	12.8677	22.6714	22.5231	22.6989	22.6285	22.453	22.5056	22.6636	22.6109	22.5933	22.6989	22.5933	22.5231	22.488	22.6285	22.8754	-68.7615	-68.8033	-68.7615	-68.8033	-68.7615	-68.7615	-68.7615	-68.8033	-68.7615	-68.8033	-68.7615	-68.7615	-68.8033	-68.7615	-68.7615	-68.7615	-68.8033	-68.7615	-68.7615	-68.7615	-68.7615	-68.7615	-68.8033	22.6285	22.3482	22.5231	22.7694
2008-03-18 03:50:20	12.8677	22.6714	22.5231	22.6989	22.6285	22.453	22.5231	22.6636	22.6109	22.6109	22.7165	22.5933	22.5231	22.488	22.6285	22.8754	-68.7615	-68.7615	-68.8033	-68.7197	-68.7615	-68.7615	-68.7615	-68.7615	-68.8033	-68.7615	-68.8033	-68.7615	-68.7615	-68.8033	-68.8033	-68.7615	-68.7615	-68.7615	-68.7615	-68.7615	-68.7615	-68.8033	-68.7615	22.6285	22.3482	22.5231	22.7694
2008-03-18 03:50:40	12.8677	22.6714	22.5226	22.6984	22.6281	22.4526	22.5051	22.6632	22.6104	22.6104	22.716	22.5928	22.5226	22.4876	22.6281	22.875	-68.8033	-68.8033	-68.7615	-68.7615	-68.7615	-68.7615	-68.8033	-68.7197	-68.7615	-68.8033	-68.8033	-68.7615	-68.7615	-68.7615	-68.7615	-68.7615	-68.8033	-68.7615	-68.7615	-68.8033	-68.8033	-68.8033	-68.8033	22.6281	22.3477	22.5226	22.7689
2008-03-18 03:51:00	12.8677	22.6714	22.5223	22.6981	22.6453	22.4522	22.5223	22.6628	22.6276	22.6101	22.7333	22.5925	22.5398	22.4873	22.6276	22.8746	-68.7615	-68.7615	-68.7615	-68.7615	-68.7615	-68.8033	-68.8033	-68.7615	-68.7197	-68.8033	-68.7615	-68.8033	-68.7615	-68.7615	-68.7615	-68.7615	-68.7197	-68.7615	-68.7615	-68.7615	-68.8033	-68.7615	-68.7615	22.6276	22.3473	22.5223	22.7686
2008-03-18 03:51:20	12.8677	22.6985	22.5398	22.7157	22.6453	22.4522	22.5223	22.6628	22.6276	22.6101	22.7333	22.6101	22.5574	22.5047	22.6453	22.8746	-68.7615	-68.8033	-68.8033	-68.7615	-68.8033	-68.7615	-68.8033	-68.7615	-68.7615	-68.7197	-68.8033	-68.7615	-68.8033	-68.7615	-68.7615	-68.7615	-68.8033	-68.8033	-68.8033	-68.7197	-68.7197	-68.7615	-68.7615	22.6276	22.3473	22.5223	22.7686
2008-03-18 03:51:40	12.8731	22.6985	22.5221	22.7154	22.6626	22.4519	22.5221	22.6626	22.6274	22.6274	22.733	22.6098	22.5571	22.5045	22.645	22.8743	-68.7615	-68.8033	-68.8033	-68.8033	-68.7615	-68.7615	-68.8033	-68.7615	-68.8033	-68.7615	-68.8033	-68.8033	-68.7615	-68.7615	-68.7615	-68.7615	-68.7615	-68.7615	-68.7615	-68.7615	-68.7615	-68.7615	-68.7615	22.6274	22.347	22.5221	22.7682
2008-03-18 03:52:00	12.8622	22.7278	22.5571	22.733	22.6626	22.4519	22.5221	22.6626	22.6274	22.6274	22.733	22.6274	22.5571	22.5045	22.6626	22.8743	-68.8033	-68.7615	-68.7615	-68.7615	-68.7615	-68.8033	-68.8033	-68.7615	-68.8033	-68.7615	-68.7615	-68.8033	-68.7615	-68.7615	-68.8033	-68.7615	-68.7615	-68.7615	-68.8033	-68.8033	-68.8033	-68.7615	-68.7615	22.6274	22.347	22.5396	22.8035
2008-03-18 03:52:20	12.8731	22.7278	22.5569	22.7328	22.6623	22.4517	22.5218	22.6799	22.6272	22.6272	22.7328	22.6272	22.5569	22.4867	22.6623	22.8741	-68.7615	-68.8033	-68.7615	-68.7615	-68.8033	-68.7615	-68.8033	-68.7615	-68.7615	-68.7615	-68.8033	-68.8033	-68.8033	-68.8033	-68.7615	-68.8033	-68.7615	-68.7615	-68.7615	-68.7615	-68.7615	-68.8033	-68.7615	22.6447	22.3468	22.5393	22.8034
2008-03-18 03:52:40	12.8677	22.7278	22.5391	22.7325	22.6622	22.4515	22.5217	22.6798	22.627	22.627	22.7325	22.627	22.5567	22.5217	22.6622	22.8739	-68.7615	-68.8033	-68.7615	-68.8033	-68.7615	-68.7615	-68.7615	-68.7615	-68.7197	-68.8033	-68.7615	-68.7615	-68.7615	-68.7615	-68.7615	-68.7197	-68.7615	-68.7615	-68.7615	-68.7615	-68.7615	-68.7615	-68.7615	22.6445	22.3466	22.5217	22.8032
2008-03-18 03:53:00	12.8677	22.7549	22.5567	22.715	22.6622	22.4515	22.5217	22.6974	22.627	22.627	22.7325	22.627	22.5567	22.5217	22.6622	22.8739	-68.7615	-68.7615	-68.7615	-68.7615	-68.7615	-68.8033	-68.7615	-68.7615	-68.8033	-68.7615	-68.8033	-68.7615	-68.7197	-68.7615	-68.8033	-68.7197	-68.8033	-68.7197	-68.7615	-68.7615	-68.7615	-68.7615	-68.8033	22.6622	22.3815	22.5567	22.8032
2008-03-18 03:53:20	12.8731	22.7549	22.5566	22.7325	22.662	22.4514	22.5215	22.6972	22.6269	22.6269	22.7325	22.6269	22.5566	22.5215	22.662	22.8737	-68.7615	-68.8033	-68.7615	-68.8033	-68.7615	-68.8033	-68.7615	-68.7615	-68.8033	-68.7615	-68.7615	-68.7615	-68.7615	-68.8033	-68.8033	-68.7615	-68.7615	-68.8033	-68.7615	-68.8033	-68.7615	-68.7615	-68.8033	22.662	22.3814	22.5566	22.803
2008-03-18 03:53:40	12.8677	22.7549	22.5565	22.7323	22.6619	22.4513	22.5214	22.6971	22.6267	22.6267	22.7323	22.6267	22.5565	22.5214	22.6619	22.8737	-68.8033	-68.7615	-68.7615	-68.7615	-68.7615	-68.7615	-68.7615	-68.7615	-68.7615	-68.7615	-68.8033	-68.7615	-68.7615	-68.7615	-68.7615	-68.7197	-68.8033	-68.8033	-68.7197	-68.7615	-68.7615	-68.7615	-68.8033	22.6619	22.3813	22.5565	22.8029
2008-03-18 03:54:00	12.8677	22.7843	22.5565	22.7323	22.6619	22.4688	22.5389	22.6971	22.6267	22.6267	22.7323	22.6267	22.5565	22.5214	22.6619	22.8737	-68.7615	-68.8033	-68.7615	-68.7615	-68.7197	-68.8033	-68.7615	-68.8033	-68.7615	-68.8033	-68.7615	-68.7615	-68.8033	-68.7615	-68.8033	-68.8033	-68.7615	-68.7615	-68.7615	-68.7615	-68.8033	-68.7615	-68.7615	22.6619	22.3813	22.5565	22.8029
2008-03-18 03:54:20	12.8677	22.7843	22.5564	22.7322	22.6617	22.4688	22.5388	22.6969	22.6266	22.6266	22.7322	22.6266	22.5739	22.5212	22.6617	22.909	-68.8033	-68.7615	-68.8033	-68.8033	-68.7615	-68.8033	-68.8033	-68.7615	-68.8033	-68.7615	-68.7615	-68.8033	-68.7197	-68.7615	-68.7615	-68.7615	-68.7615	-68.8033	-68.7615	-68.8033	-68.7615	-68.7615	-68.7615	22.6617	22.3637	22.5564	22.8028
2008-03-18 03:54:40	12.8677	22.8114	22.5564	22.7322	22.6617	22.4688	22.5388	22.6969	22.6266	22.6266	22.7322	22.6266	22.5739	22.5212	22.6617	22.909	-68.7615	-68.7615	-68.8033	-68.7615	-68.7615	-68.7615	-68.7615	-68.8033	-68.8033	-68.7615	-68.7615	-68.7615	-68.7615	-68.7615	-68.8033	-68.7615	-68.7615	-68.7615	-68.7615	-68.7615	-68.8033	-68.8033	-68.7615	22.6617	22.3812	22.5564	22.8028
2008-03-18 03:55:00	12.8731	22.8114	22.5563	22.7322	22.6617	22.4861	22.5563	22.6969	22.6265	22.6265	22.7498	22.6265	22.5914	22.5212	22.6793	22.9088	-68.7615	-68.8033	-68.7615	-68.7615	-68.7615	-68.7615	-68.7615	-68.7615	-68.7615	-68.7615	-68.7615	-68.7615	-68.8033	-68.8033	-68.8033	-68.7615	-68.8033	-68.7615	-68.7615	-68.7615	-68.7615	-68.7615	-68.8033	22.6617	22.3812	22.5563	22.8028
2008-03-18 03:55:20	12.8677	22.8114	22.5562	22.7321	22.6616	22.486	22.5562	22.6968	22.6264	22.6264	22.7498	22.6264	22.5913	22.5211	22.6616	22.9088	-68.7615	-68.8033	-68.8033	-68.7615	-68.8033	-68.8033	-68.7615	-68.7615	-68.8033	-68.7615	-68.7615	-68.7615	-68.8033	-68.8033	-68.8033	-68.7615	-68.7197	-68.8033	-68.7615	-68.8033	-68.7615	-68.7615	-68.7615	22.6616	22.3811	22.5562	22.8027
2008-03-18 03:55:40	12.8677	22.8408	22.5738	22.7321	22.6616	22.486	22.5562	22.7144	22.6264	22.6441	22.7674	22.6264	22.5913	22.5211	22.6616	22.9088	-68.7615	-68.8033	-68.7615	-68.8033	-68.7615	-68.7615	-68.7615	-68.7615	-68.7615	-68.7615	-68.7615	-68.8033	-68.8033	-68.7615	-68.7615	-68.7615	-68.7615	-68.7615	-68.7615	-68.7615	-68.7615	-68.8033	-68.8033	22.6616	22.3811	22.5562	22.8027
2008-03-18 03:56:00	12.8731	22.8408	22.5737	22.7497	22.6616	22.4861	22.5561	22.7144	22.6264	22.644	22.7673	22.6616	22.5912	22.521	22.6792	22.9088	-68.7615	-68.7615	-68.8033	-68.8033	-68.7615	-68.7615	-68.7615	-68.8033	-68.8033	-68.7615	-68.7615	-68.7615	-68.8033	-68.7615	-68.7615	-68.7615	-68.7615	-68.7615	-68.8033	-68.7615	-68.7615	-68.8033	-68.8033	22.6616	22.381	22.5561	22.8027
2008-03-18 03:56:20	12.8731	22.8408	22.5737	22.7496	22.6792	22.486	22.5562	22.732	22.6439	22.6263	22.7673	22.6616	22.5912	22.5562	22.6792	22.9088	-68.7615	-68.7615	-68.7615	-68.7615	-68.8033	-68.7615	-68.7615	-68.7615	-68.8033	-68.7615	-68.7615	-68.7197	-68.8033	-68.7615	-68.7615	-68.7615	-68.7615	-68.7615	-68.7615	-68.8033	-68.8033	-68.7615	-68.8033	22.6616	22.381	22.5737	22.8026
2008-03-18 03:56:40	12.8677	22.8679	22.5912	22.7673	22.6616	22.486	22.5562	22.7144	22.6439	22.6616	22.7673	22.6616	22.5912	22.5562	22.6968	22.9088	-68.7615	-68.7615	-68.7615	-68.8033	-68.7615	-68.7615	-68.7615	-68.7615	-68.7615	-68.7615	-68.8033	-68.8033	-68.7615	-68.7615	-68.7615	-68.7615	-68.7615	-68.8033	-68.8033	-68.7615	-68.7615	-68.8033	-68.8033	22.6616	22.381	22.5737	22.8026
2008-03-18 03:57:00	12.8731	22.8679	22.5912	22.7673	22.6615	22.4859	22.5561	22.732	22.6439	22.6615	22.7673	22.6615	22.5912	22.5385	22.6968	22.9442	-68.8033	-68.7615	-68.8033	-68.7615	-68.7615	-68.7615	-68.7197	-68.7615	-68.7615	-68.7615	-68.7615	-68.7615	-68.7615	-68.7615	-68.7615	-68.7615	-68.7615	-68.8033	-68.7615	-68.8033	-68.8033	-68.8033	-68.8033	22.6968	22.381	22.5912	22.8203
2008-03-18 03:57:20	12.8677	22.8973	22.5912	22.7673	22.6968	22.4859	22.5912	22.732	22.6615	22.6615	22.7673	22.6615	22.5912	22.5561	22.6968	22.9442	-68.7615	-68.7615	-68.7615	-68.7615	-68.7615	-68.7615	-68.8033	-68.7615	-68.8033	-68.7615	-68.7615	-68.7615	-68.7615	-68.7615	-68.7615	-68.8033	-68.8033	-68.7615	-68.7615	-68.7615	-68.7615	-68.7615	-68.7615	22.6615	22.381	22.5736	22.8379
2008-03-18 03:57:40	12.8677	22.8973	22.5911	22.7673	22.6791	22.4859	22.5911	22.7319	22.6615	22.6615	22.7673	22.6615	22.5911	22.5561	22.6967	22.9441	-68.7615	-68.8033	-68.7615	-68.7615	-68.7615	-68.7615	-68.8033	-68.7615	-68.8033	-68.7615	-68.7615	-68.8033	-68.7615	-68.7615	-68.7615	-68.7615	-68.7197	-68.7615	-68.7615	-68.8033	-68.8033	-68.7615	-68.8033	22.6615	22.381	22.5911	22.838
2008-03-18 03:58:00	12.8731	22.8973	22.5911	22.7672	22.6967	22.4859	22.5911	22.7319	22.6615	22.6615	22.7672	22.6615	22.5911	22.556	22.6967	22.9441	-68.7615	-68.8033	-68.7615	-68.7615	-68.8033	-68.7615	-68.8033	-68.7615	-68.8033	-68.8033	-68.7615	-68.8033	-68.8033	-68.7615	-68.8033	-68.8033	-68.8033	-68.7615	-68.7615	-68.8033	-68.8033	-68.8033	-68.8033	22.6967	22.3809	22.5911	22.8378
2008-03-18 03:58:20	12.8677	22.8973	22.5911	22.7672	22.6967	22.5035	22.5911	22.7319	22.6615	22.6615	22.7672	22.6615	22.5911	22.556	22.6967	22.9441	-68.8033	-68.7615	-68.7615	-68.7615	-68.7615	-68.7615	-68.7615	-68.8033	-68.8033	-68.7615	-68.7615	-68.7615	-68.7615	-68.7615	-68.8033	-68.7615	-68.7615	-68.8033	-68.7615	-68.7615	-68.7615	-68.8033	-68.7615	22.6791	22.3809	22.5911	22.8378
2008-03-18 03:58:40	12.8677	22.9244	22.5911	22.7672	22.6966	22.5035	22.5911	22.7319	22.6615	22.6615	22.7672	22.6615	22.5911	22.556	22.6966	22.944	-68.7615	-68.7615	-68.7615	-68.7615	-68.8033	-68.7615	-68.7615	-68.7615	-68.8033	-68.7197	-68.7615	-68.8033	-68.8033	-68.7615	-68.7615	-68.8033	-68.7615	-68.7615	-68.8033	-68.8033	-68.7615	-68.8033	-68.7615	22.6966	22.3808	22.5911	22.8379
2008-03-18 03:59:00	12.8731	22.9244	22.5912	22.7849	22.6966	22.5034	22.5912	22.732	22.6614	22.6614	22.7849	22.6614	22.5912	22.5561	22.6966	22.944	-68.7615	-68.7615	-68.7615	-68.7615	-68.7615	-68.7615	-68.7615	-68.8033	-68.8033	-68.8033	-68.7615	-68.7615	-68.7615	-68.7615	-68.7615	-68.7615	-68.8033	-68.8033	-68.7615	-68.8033	-68.7615	-68.7615	-68.8033	22.6966	22.3809	22.5912	22.8378
2008-03-18 03:59:20	12.8731	22.9538	22.5912	22.8025	22.6966	22.521	22.5912	22.732	22.6614	22.6614	22.7849	22.679	22.5912	22.5561	22.7142	22.944	-68.7615	-68.8033	-68.8033	-68.8033	-68.7615	-68.7615	-68.7615	-68.7615	-68.7615	-68.8033	-68.7615	-68.7615	-68.7615	-68.8033	-68.7615	-68.8033	-68.7615	-68.7615	-68.7615	-68.8033	-68.7615	-68.8033	-68.8033	22.6966	22.3809	22.5912	22.8555
2008-03-18 03:59:40	12.8677	22.9538	22.5911	22.8025	22.6966	22.5209	22.5911	22.7319	22.6615	22.6615	22.8025	22.6615	22.5911	22.556	22.7142	22.9441	-68.8033	-68.7615	-68.7615	-68.7615	-68.7615	-68.7615	-68.8033	-68.7615	-68.8033	-68.7615	-68.7615	-68.7615	-68.8033	-68.7615	-68.8033	-68.7615	-68.7615	-68.7615	-68.7615	-68.8033	-68.7615	-68.8033	-68.7615	22.6966	22.3809	22.5911	22.8555
2008-03-18 04:00:00	12.8677	22.9538	22.5911	22.8025	22.6966	22.5209	22.5911	22.7319	22.679	22.6615	22.8025	22.6615	22.6087	22.5911	22.7319	22.9441	-68.7615	-68.7615	-68.7615	-68.7615	-68.7615	-68.7615	-68.8033	-68.7615	-68.7615	-68.8033	-68.8033	-68.7615	-68.7615	-68.7615	-68.8033	-68.7197	-68.7615	-68.7615	-68.7615	-68.8033	-68.8033	-68.7615	-68.7615	22.6966	22.3983	22.5911	22.8732
2008-03-18 04:00:20	12.8677	22.9809	22.5911	22.8025	22.6966	22.5209	22.5911	22.7319	22.6614	22.679	22.8025	22.679	22.6263	22.5735	22.7319	22.9441	-68.8033	-68.7615	-68.7615	-68.7615	-68.7615	-68.7615	-68.7615	-68.8033	-68.7615	-68.7615	-68.7615	-68.7197	-68.7615	-68.8033	-68.7615	-68.7615	-68.7615	-68.8033	-68.7615	-68.7615	-68.7615	-68.8033	-68.8033	22.6966	22.3809	22.5911	22.8732
2008-03-18 04:00:40	12.8731	22.9809	22.5911	22.8025	22.6966	22.5209	22.5911	22.7319	22.679	22.6614	22.8025	22.6614	22.6263	22.5911	22.7319	22.9441	-68.7615	-68.7615	-68.8033	-68.7615	-68.7615	-68.7615	-68.8033	-68.8033	-68.7615	-68.7615	-68.8033	-68.7615	-68.7615	-68.7615	-68.8033	-68.7615	-68.7615	-68.7615	-68.8033	-68.7615	-68.7615	-68.8033	-68.8033	22.6966	22.3809	22.5911	22.8732
2008-03-18 04:01:00	12.8731	22.9809	22.6087	22.8025	22.6966	22.5209	22.5911	22.7495	22.6966	22.6614	22.8025	22.6966	22.6263	22.5911	22.7319	22.9441	-68.7615	-68.8033	-68.7615	-68.7615	-68.7615	-68.8033	-68.7615	-68.8033	-68.7615	-68.8033	-68.8033	-68.8033	-68.7615	-68.7615	-68.7615	-68.7615	-68.7615	-68.7615	-68.8033	-68.8033	-68.7615	-68.7615	-68.7615	22.6966	22.3809	22.5911	22.8732
2008-03-18 04:01:20	12.8677	23.0102	22.6087	22.8024	22.7143	22.5209	22.6262	22.7672	22.6967	22.6614	22.8024	22.6967	22.6262	22.5911	22.7319	22.944	-68.8033	-68.8033	-68.8033	-68.8033	-68.7615	-68.7615	-68.7615	-68.7615	-68.7615	-68.7615	-68.8033	-68.7615	-68.7197	-68.8033	-68.7615	-68.8033	-68.7615	-68.8033	-68.7615	-68.7615	-68.8033	-68.7615	-68.7615	22.7143	22.4158	22.6087	22.8732
2008-03-18 04:01:40	12.8677	23.0102	22.6262	22.8024	22.6967	22.5209	22.6087	22.7672	22.6967	22.679	22.8024	22.6967	22.6262	22.5911	22.7319	22.9794	-68.8033	-68.7615	-68.8033	-68.8033	-68.7615	-68.7615	-68.8033	-68.8033	-68.7615	-68.7615	-68.7615	-68.7615	-68.7615	-68.8033	-68.7615	-68.7615	-68.7615	-68.8033	-68.7615	-68.8033	-68.7615	-68.8033	-68.8033	22.7319	22.4158	22.6087	22.8732
2008-03-18 04:02:00	12.8677	23.0102	22.6262	22.8024	22.7143	22.5209	22.6087	22.7672	22.6967	22.679	22.8024	22.6967	22.6262	22.5911	22.7319	22.9794	-68.7615	-68.7615	-68.7615	-68.7615	-68.7615	-68.7615	-68.7615	-68.7615	-68.7615	-68.7615	-68.7615	-68.8033	-68.8033	-68.7615	-68.8033	-68.7615	-68.7615	-68.7615	-68.8033	-68.7615	-68.7615	-68.7615	-68.8033	22.7143	22.4158	22.6262	22.8732
2008-03-18 04:02:20	12.8731	23.0102	22.6262	22.8024	22.6967	22.5209	22.6262	22.7672	22.6967	22.6967	22.8024	22.6967	22.6262	22.5911	22.7319	22.9794	-68.7615	-68.7615	-68.7615	-68.7615	-68.7615	-68.7615	-68.8033	-68.7615	-68.8033	-68.7615	-68.8033	-68.7615	-68.7615	-68.7615	-68.8033	-68.7615	-68.8033	-68.8033	-68.7615	-68.8033	-68.7615	-68.7615	-68.8033	22.7319	22.4158	22.6262	22.8732
2008-03-18 04:02:40	12.8731	23.0396	22.6262	22.8024	22.7319	22.5209	22.6262	22.7672	22.6967	22.6967	22.8024	22.6967	22.6262	22.5911	22.7319	22.9794	-68.7615	-68.7615	-68.7615	-68.7615	-68.7615	-68.7615	-68.7615	-68.8033	-68.7615	-68.7615	-68.7615	-68.8033	-68.7615	-68.7615	-68.7615	-68.8033	-68.7615	-68.8033	-68.7615	-68.7615	-68.8033	-68.8033	-68.7615	22.7319	22.4158	22.6262	22.8732
2008-03-18 04:03:00	12.8731	23.0396	22.6262	22.8024	22.7143	22.5209	22.6262	22.7672	22.6967	22.6967	22.8024	22.6967	22.6262	22.5911	22.7319	22.9794	-68.8033	-68.8033	-68.8033	-68.8033	-68.7615	-68.7615	-68.7615	-68.7615	-68.8033	-68.8033	-68.7197	-68.8033	-68.8033	-68.8033	-68.8033	-68.7615	-68.7197	-68.7615	-68.7615	-68.7615	-68.8033	-68.7615	-68.7615	22.7319	22.4158	22.6262	22.8732
2008-03-18 04:03:20	12.8731	23.0667	22.6262	22.8024	22.7319	22.5209	22.6262	22.7672	22.6967	22.6967	22.8024	22.6967	22.6262	22.5911	22.7319	22.9794	-68.7615	-68.7615	-68.7615	-68.7615	-68.7615	-68.8033	-68.8033	-68.7615	-68.7615	-68.8033	-68.8033	-68.7615	-68.8033	-68.7615	-68.8033	-68.7615	-68.8033	-68.7615	-68.7615	-68.8033	-68.8033	-68.7615	-68.8033	22.7319	22.4158	22.6262	22.8732
2008-03-18 04:03:40	12.8731	23.0667	22.6262	22.8024	22.7319	22.5209	22.6262	22.7672	22.6967	22.6967	22.8024	22.6967	22.6262	22.5911	22.7319	22.9794	-68.7615	-68.8033	-68.7615	-68.7615	-68.7615	-68.7615	-68.8033	-68.7615	-68.7615	-68.8033	-68.8033	-68.7615	-68.8033	-68.7615	-68.7615	-68.7615	-68.8033	-68.7615	-68.7615	-68.8033	-68.8033	-68.7615	-68.7615	22.7319	22.4158	22.6262	22.8909
2008-03-18 04:04:00	12.8731	23.0667	22.6262	22.8024	22.7319	22.5209	22.6262	22.7848	22.6967	22.6967	22.8024	22.7319	22.6262	22.5911	22.7319	22.9794	-68.7615	-68.7615	-68.7615	-68.8033	-68.8033	-68.8033	-68.7615	-68.7615	-68.7615	-68.8033	-68.7615	-68.8033	-68.7615	-68.7615	-68.7615	-68.7615	-68.7615	-68.7615	-68.8033	-68.7615	-68.8033	-68.8033	-68.7615	22.7319	22.4158	22.6262	22.9086
2008-03-18 04:04:20	12.8731	23.0667	22.6262	22.8201	22.7319	22.5209	22.6262	22.8024	22.6967	22.6967	22.8201	22.7143	22.6438	22.5911	22.7319	22.9972	-68.8033	-68.7615	-68.8033	-68.7615	-68.7615	-68.8033	-68.7615	-68.7615	-68.7615	-68.8033	-68.8033	-68.8033	-68.8033	-68.7615	-68.8033	-68.8033	-68.7615	-68.7615	-68.7615	-68.7615	-68.8033	-68.7615	-68.7615	22.7319	22.4158	22.6262	22.9086
2008-03-18 04:04:40	12.8731	23.0961	22.6262	22.8201	22.7319	22.5209	22.6262	22.8024	22.7143	22.6967	22.8201	22.7319	22.6438	22.5911	22.7319	22.9972	-68.8033	-68.7615	-68.7615	-68.7615	-68.8033	-68.7615	-68.7615	-68.8033	-68.7615	-68.7615	-68.7615	-68.7615	-68.8033	-68.8033	-68.7615	-68.7615	-68.7615	-68.8033	-68.7615	-68.7615	-68.7615	-68.7615	-68.7615	22.7319	22.4158	22.6262	22.9086
2008-03-18 04:05:00	12.8731	23.0961	22.6262	22.8378	22.7319	22.5385	22.6262	22.8024	22.7319	22.7143	22.8201	22.7319	22.6438	22.5911	22.7319	23.015	-68.7615	-68.7615	-68.7615	-68.7615	-68.8033	-68.7615	-68.8033	-68.7615	-68.8033	-68.8033	-68.7615	-68.7615	-68.8033	-68.7615	-68.8033	-68.8033	-68.8033	-68.7615	-68.7615	-68.8033	-68.7615	-68.7615	-68.8033	22.7319	22.4158	22.6438	22.9086
2008-03-18 04:05:20	12.8677	23.0961	22.6262	22.8201	22.7319	22.5385	22.6262	22.8024	22.7319	22.7143	22.8378	22.7319	22.6438	22.6087	22.7495	23.015	-68.7615	-68.7615	-68.7615	-68.8033	-68.7615	-68.7615	-68.8033	-68.7615	-68.7615	-68.7615	-68.7615	-68.8033	-68.8033	-68.8033	-68.7615	-68.7615	-68.7615	-68.8033	-68.8033	-68.7615	-68.7615	-68.7615	-68.7615	22.7319	22.4158	22.6614	22.9086
2008-03-18 04:05:40	12.8731	23.1232	22.6262	22.8378	22.7319	22.5209	22.6262	22.8024	22.7319	22.7143	22.8378	22.7319	22.6614	22.6262	22.7495	23.015	-68.7615	-68.7615	-68.7615	-68.7615	-68.8033	-68.8033	-68.7615	-68.7615	-68.8033	-68.8033	-68.7615	-68.8033	-68.7615	-68.8033	-68.7615	-68.7615	-68.8033	-68.7615	-68.7615	-68.8033	-68.7615	-68.7615	-68.7615	22.7319	22.4158	22.6614	22.9086
2008-03-18 04:06:00	12.8731	23.1232	22.6438	22.8378	22.7319	22.5385	22.6438	22.8024	22.7319	22.7319	22.8378	22.7319	22.6614	22.6262	22.7672	23.015	-68.7615	-68.8033	-68.7615	-68.8033	-68.7615	-68.7615	-68.8033	-68.7615	-68.8033	-68.8033	-68.8033	-68.7615	-68.7615	-68.8033	-68.7615	-68.7615	-68.7615	-68.7615	-68.7615	-68.7615	-68.7615	-68.7615	-68.7615	22.7319	22.4158	22.6614	22.9086
2008-03-18 04:06:20	12.8677	23.1232	22.6614	22.8378	22.7319	22.556	22.6262	22.8024	22.7319	22.7319	22.8378	22.7319	22.6614	22.6262	22.7495	23.015	-68.8033	-68.7615	-68.7615	-68.7615	-68.7615	-68.7615	-68.7197	-68.7197	-68.8033	-68.7615	-68.7615	-68.8033	-68.7615	-68.7197	-68.7615	-68.7615	-68.8033	-68.7615	-68.7615	-68.8033	-68.7615	-68.7615	-68.8033	22.7319	22.4158	22.6614	22.9086
2008-03-18 04:06:40	12.8677	23.1526	22.6438	22.8378	22.7319	22.5385	22.6438	22.8024	22.7319	22.7319	22.8378	22.7319	22.6614	22.6262	22.7672	23.015	-68.8033	-68.7615	-68.8033	-68.7615	-68.8033	-68.8033	-68.8033	-68.7615	-68.8033	-68.7615	-68.7615	-68.8033	-68.8033	-68.8033	-68.7615	-68.7615	-68.7615	-68.7615	-68.7615	-68.7615	-68.8033	-68.7615	-68.8033	22.7319	22.4508	22.6614	22.9086
2008-03-18 04:07:00	12.8731	23.1526	22.6614	22.8378	22.7319	22.556	22.6614	22.8024	22.7319	22.7319	22.8378	22.7319	22.6614	22.6262	22.7672	23.015	-68.7615	-68.8033	-68.7615	-68.7615	-68.7615	-68.7615	-68.8033	-68.8033	-68.7615	-68.7615	-68.7615	-68.7615	-68.8033	-68.8033	-68.7615	-68.7615	-68.8033	-68.7615	-68.7615	-68.8033	-68.7615	-68.7615	-68.8033	22.7319	22.4158	22.6614	22.9086
2008-03-18 04:07:20	12.8731	23.1797	22.6614	22.8378	22.7319	22.556	22.6438	22.8024	22.7319	22.7319	22.8378	22.7319	22.6614	22.6262	22.7672	23.015	-68.7615	-68.7615	-68.7615	-68.8033	-68.7615	-68.7615	-68.7615	-68.7615	-68.8033	-68.7615	-68.8033	-68.7615	-68.8033	-68.7615	-68.7615	-68.8033	-68.7615	-68.7615	-68.7615	-68.7615	-68.7615	-68.7615	-68.7615	22.7319	22.4333	22.6614	22.9086
2008-03-18 04:07:40	12.8731	23.1797	22.6614	22.8378	22.7319	22.556	22.6614	22.8024	22.7319	22.7319	22.8378	22.7319	22.6614	22.6262	22.7672	23.015	-68.8033	-68.7615	-68.8033	-68.7615	-68.7615	-68.8033	-68.7615	-68.8033	-68.7615	-68.8033	-68.7615	-68.7615	-68.8033	-68.7615	-68.7615	-68.7615	-68.8033	-68.7615	-68.7197	-68.7615	-68.7615	-68.7615	-68.7615	22.7495	22.4508	22.6614	22.9086
2008-03-18 04:08:00	12.8731	23.1797	22.6614	22.8378	22.7495	22.556	22.6614	22.8024	22.7319	22.7319	22.8378	22.7319	22.6614	22.6262	22.7672	23.015	-68.8033	-68.8033	-68.7615	-68.8033	-68.7615	-68.8033	-68.7615	-68.8033	-68.7615	-68.7197	-68.7615	-68.8033	-68.7615	-68.8033	-68.7615	-68.7615	-68.7615	-68.8033	-68.7615	-68.7615	-68.7615	-68.8033	-68.7615	22.7495	22.4508	22.6614	22.9086
2008-03-18 04:08:20	12.8677	23.1797	22.6614	22.8378	22.7495	22.556	22.6614	22.8024	22.7319	22.7319	22.8555	22.7319	22.6614	22.6262	22.7672	23.015	-68.7615	-68.8033	-68.7615	-68.7615	-68.7615	-68.7615	-68.8033	-68.7615	-68.7615	-68.7197	-68.7615	-68.7615	-68.7615	-68.7615	-68.7615	-68.7615	-68.7615	-68.8033	-68.8033	-68.7615	-68.7615	-68.8033	-68.7615	22.7495	22.4508	22.6614	22.9086
2008-03-18 04:08:40	12.8731	23.2091	22.6614	22.8555	22.7672	22.556	22.6614	22.8024	22.7319	22.7319	22.8555	22.7319	22.6614	22.6262	22.7672	23.015	-68.7615	-68.7615	-68.7615	-68.7615	-68.8033	-68.8033	-68.7615	-68.7615	-68.7615	-68.7615	-68.7615	-68.7615	-68.7615	-68.7615	-68.7615	-68.8033	-68.7615	-68.7615	-68.8033	-68.7615	-68.7615	-68.7615	-68.7615	22.7672	22.4508	22.6614	22.9086
2008-03-18 04:09:00	12.8731	23.2091	22.6614	22.8732	22.7672	22.556	22.6614	22.8024	22.7319	22.7319	22.8378	22.7319	22.6614	22.6262	22.7672	23.015	-68.7615	-68.7615	-68.7615	-68.8033	-68.7615	-68.7615	-68.8033	-68.8033	-68.7615	-68.8033	-68.8033	-68.7615	-68.7615	-68.7615	-68.7615	-68.8033	-68.8033	-68.7615	-68.8033	-68.8033	-68.7615	-68.8033	-68.8033	22.7672	22.4508	22.6614	22.944
2008-03-18 04:09:20	12.8731	23.2384	22.6614	22.8555	22.7672	22.556	22.6614	22.8024	22.7319	22.7319	22.8555	22.7319	22.6614	22.6262	22.7672	23.015	-68.8033	-68.7197	-68.8033	-68.7197	-68.7615	-68.7615	-68.7615	-68.7615	-68.7615	-68.8033	-68.8033	-68.8033	-68.7197	-68.8033	-68.7615	-68.7615	-68.7615	-68.7197	-68.7615	-68.7615	-68.8033	-68.8033	-68.8033	22.7672	22.4508	22.6614	22.944
2008-03-18 04:09:40	12.8731	23.2384	22.6614	22.8555	22.7672	22.556	22.6614	22.8024	22.7319	22.7319	22.8555	22.7319	22.6614	22.6438	22.7672	23.015	-68.7615	-68.7615	-68.8033	-68.7615	-68.7615	-68.7615	-68.8033	-68.8033	-68.7615	-68.8033	-68.7615	-68.7197	-68.7615	-68.7615	-68.7615	-68.8033	-68.7615	-68.8033	-68.7615	-68.8033	-68.7615	-68.7615	-68.7615	22.7672	22.4508	22.6614	22.944
2008-03-18 04:10:00	12.8731	23.2384	22.6614	22.8732	22.7672	22.556	22.6614	22.8024	22.7319	22.7319	22.8555	22.7319	22.679	22.6262	22.7672	23.0327	-68.7615	-68.8033	-68.7615	-68.7615	-68.7615	-68.7615	-68.7615	-68.8033	-68.7615	-68.8033	-68.7615	-68.7615	-68.8033	-68.7615	-68.8033	-68.7615	-68.7615	-68.8033	-68.7615	-68.7615	-68.8033	-68.8033	-68.8033	22.7672	22.4508	22.6614	22.944
2008-03-18 04:10:20	12.8731	23.2384	22.6614	22.8555	22.7672	22.556	22.6614	22.8024	22.7319	22.7319	22.8732	22.7495	22.6614	22.6438	22.7848	23.015	-68.7615	-68.7615	-68.8033	-68.7615	-68.8033	-68.7615	-68.8033	-68.7615	-68.8033	-68.8033	-68.7615	-68.7615	-68.7615	-68.8033	-68.7615	-68.7615	-68.7615	-68.8033	-68.7615	-68.8033	-68.8033	-68.7615	-68.8033	22.7672	22.4508	22.6614	22.944
2008-03-18 04:10:40	12.8731	23.2384	22.6614	22.8555	22.7672	22.5736	22.6614	22.8378	22.7495	22.7319	22.8732	22.7495	22.6614	22.6262	22.7672	23.015	-68.8033	-68.7615	-68.7615	-68.7615	-68.7615	-68.7615	-68.7615	-68.7615	-68.8033	-68.7615	-68.7615	-68.8033	-68.7615	-68.8033	-68.8033	-68.7615	-68.7615	-68.7615	-68.8033	-68.7615	-68.7615	-68.7615	-68.7615	22.7672	22.4508	22.6614	22.944
2008-03-18 04:11:00	12.8731	23.2655	22.6614	22.8555	22.7672	22.556	22.6614	22.8024	22.7319	22.7319	22.8732	22.7495	22.6614	22.6438	22.7672	23.015	-68.8033	-68.7615	-68.7615	-68.7615	-68.8033	-68.7615	-68.7615	-68.8033	-68.7615	-68.7615	-68.8033	-68.7615	-68.7615	-68.7615	-68.8033	-68.7615	-68.7615	-68.7615	-68.7615	-68.7615	-68.7615	-68.8033	-68.8033	22.7672	22.4508	22.679	22.944
2008-03-18 04:11:20	12.8731	23.2655	22.6614	22.8732	22.7672	22.5736	22.6614	22.8024	22.7495	22.7319	22.8732	22.7672	22.6614	22.6438	22.7672	23.0327	-68.7615	-68.8033	-68.7615	-68.7615	-68.7615	-68.7197	-68.7615	-68.7615	-68.7615	-68.7615	-68.8033	-68.8033	-68.7615	-68.7615	-68.7615	-68.8033	-68.7615	-68.7197	-68.7615	-68.8033	-68.8033	-68.8033	-68.7197	22.7672	22.4508	22.679	22.944
2008-03-18 04:11:40	12.8731	23.2949	22.6614	22.8732	22.7672	22.5911	22.6614	22.8201	22.7495	22.7319	22.8732	22.7495	22.6614	22.6438	22.7848	23.015	-68.8033	-68.7615	-68.8033	-68.7615	-68.8033	-68.8033	-68.7615	-68.7615	-68.7615	-68.8033	-68.8033	-68.7615	-68.7615	-68.8033	-68.7615	-68.7615	-68.7615	-68.8033	-68.7615	-68.7615	-68.7615	-68.7615	-68.8033	22.7672	22.4508	22.6967	22.944
2008-03-18 04:12:00	12.8786	23.2949	22.6614	22.8555	22.7672	22.556	22.6614	22.8378	22.7495	22.7319	22.8732	22.7495	22.6614	22.6438	22.7672	23.015	-68.7615	-68.7615	-68.8033	-68.7615	-68.8033	-68.7615	-68.7615	-68.8033	-68.7615	-68.7615	-68.7615	-68.7615	-68.8033	-68.7615	-68.7615	-68.7615	-68.7615	-68.8033	-68.7615	-68.7615	-68.8033	-68.7197	-68.8033	22.7672	22.4508	22.6967	22.944
2008-03-18 04:12:20	12.8731	23.2949	22.6614	22.8732	22.7672	22.5911	22.6614	22.8378	22.7672	22.7495	22.8732	22.7495	22.679	22.6262	22.7672	23.0327	-68.7615	-68.8033	-68.7615	-68.8033	-68.7615	-68.7615	-68.7615	-68.7615	-68.7615	-68.7615	-68.8033	-68.8033	-68.8033	-68.8033	-68.7615	-68.8033	-68.8033	-68.7615	-68.7615	-68.8033	-68.8033	-68.7615	-68.7615	22.7672	22.4508	22.6967	22.944
2008-03-18 04:12:40	12.8731	23.2949	22.679	22.8732	22.7672	22.5736	22.6614	22.8201	22.7672	22.7495	22.8732	22.7672	22.6967	22.6262	22.7672	23.0505	-68.8033	-68.7615	-68.8033	-68.7615	-68.7615	-68.7615	-68.7615	-68.8033	-68.8033	-68.7615	-68.7615	-68.7615	-68.8033	-68.7615	-68.8033	-68.7615	-68.7615	-68.7615	-68.7615	-68.7615	-68.7615	-68.8033	-68.7615	22.7672	22.4508	22.6967	22.944
2008-03-18 04:13:00	12.8731	23.3243	22.6614	22.8732	22.7672	22.5911	22.6614	22.8378	22.7672	22.7495	22.8732	22.7672	22.679	22.6262	22.7672	23.015	-68.7615	-68.8033	-68.7615	-68.7615	-68.7615	-68.7615	-68.8033	-68.7615	-68.8033	-68.8033	-68.7615	-68.8033	-68.7615	-68.7615	-68.7615	-68.7615	-68.7615	-68.7615	-68.8033	-68.7615	-68.8033	-68.7615	-68.7615	22.7672	22.4508	22.6967	22.944
2008-03-18 04:13:20	12.8731	23.3243	22.6614	22.8732	22.7672	22.5911	22.6614	22.8201	22.7672	22.7495	22.8732	22.7672	22.679	22.6262	22.7672	23.0327	-68.7615	-68.7615	-68.7615	-68.7615	-68.7615	-68.7615	-68.7615	-68.7615	-68.8033	-68.7615	-68.7615	-68.7615	-68.8033	-68.8033	-68.7615	-68.7615	-68.7615	-68.7615	-68.7615	-68.8033	-68.7615	-68.8033	-68.7615	22.7672	22.4508	22.6967	22.944
2008-03-18 04:13:40	12.8731	23.3243	22.679	22.8732	22.7672	22.5911	22.6614	22.8201	22.7672	22.7672	22.8732	22.7672	22.679	22.6262	22.7672	23.015	-68.7615	-68.8033	-68.8033	-68.8033	-68.8033	-68.7615	-68.7615	-68.7615	-68.7615	-68.7615	-68.7615	-68.7615	-68.7615	-68.7615	-68.8033	-68.7615	-68.7197	-68.8033	-68.7615	-68.7615	-68.7197	-68.7615	-68.7615	22.7672	22.4508	22.6967	22.944
2008-03-18 04:14:00	12.8731	23.3243	22.6614	22.8732	22.7672	22.5911	22.6614	22.8201	22.7672	22.7672	22.8732	22.7672	22.6967	22.6262	22.7672	23.0327	-68.7615	-68.8033	-68.7615	-68.7615	-68.7615	-68.7615	-68.7615	-68.7615	-68.7615	-68.7615	-68.7615	-68.7615	-68.8033	-68.7615	-68.7615	-68.8033	-68.7615	-68.7615	-68.7615	-68.7615	-68.8033	-68.7615	-68.7615	22.7672	22.4508	22.6967	22.944
2008-03-18 04:14:20	12.8731	23.3514	22.679	22.8732	22.7672	22.5911	22.6614	22.8201	22.7672	22.7672	22.8732	22.7495	22.6967	22.6438	22.7672	23.015	-68.8033	-68.8033	-68.8033	-68.7615	-68.8033	-68.7615	-68.7615	-68.8033	-68.7615	-68.7615	-68.7615	-68.8033	-68.7615	-68.7615	-68.7615	-68.7615	-68.8033	-68.7615	-68.8033	-68.7615	-68.8033	-68.8033	-68.8033	22.7672	22.4508	22.6967	22.944
2008-03-18 04:14:40	12.8731	23.3514	22.6614	22.8732	22.7848	22.5911	22.6614	22.8201	22.7672	22.7672	22.8732	22.7672	22.6967	22.6438	22.7672	23.015	-68.8033	-68.7615	-68.8033	-68.7615	-68.7615	-68.7615	-68.7615	-68.8033	-68.7615	-68.7197	-68.7615	-68.7615	-68.8033	-68.7615	-68.7615	-68.7615	-68.7615	-68.7615	-68.7615	-68.8033	-68.8033	-68.8033	-68.8033	22.7672	22.4508	22.6967	22.944
2008-03-18 04:15:00	12.8677	23.3514	22.6614	22.8732	22.7672	22.5911	22.6614	22.8201	22.7672	22.7672	22.8732	22.7672	22.679	22.6438	22.7672	23.015	-68.8033	-68.7615	-68.8033	-68.8033	-68.8033	-68.7615	-68.7615	-68.7615	-68.7615	-68.7615	-68.7615	-68.8033	-68.7615	-68.8033	-68.7615	-68.7615	-68.8033	-68.7615	-68.7197	-68.7615	-68.8033	-68.8033	-68.7615	22.7672	22.4508	22.6967	22.944
2008-03-18 04:15:20	12.8731	23.3514	22.6614	22.8732	22.7848	22.5911	22.6614	22.8201	22.7672	22.7672	22.8732	22.7495	22.6967	22.6262	22.7672	23.015	-68.7615	-68.7615	-68.8033	-68.8033	-68.7615	-68.7615	-68.7615	-68.7615	-68.7615	-68.7615	-68.7615	-68.7615	-68.8033	-68.7615	-68.8033	-68.8033	-68.7615	-68.7615	-68.7615	-68.7615	-68.7615	-68.8033	-68.8033	22.7672	22.4508	22.6967	22.944
2008-03-18 04:15:40	12.8731	23.3808	22.6614	22.8732	22.7848	22.5911	22.6614	22.8201	22.7672	22.7672	22.8732	22.7672	22.6967	22.6438	22.7672	23.0327	-68.7615	-68.8033	-68.7615	-68.7615	-68.7615	-68.7615	-68.7615	-68.7615	-68.7615	-68.8033	-68.7615	-68.7615	-68.8033	-68.7615	-68.8033	-68.7615	-68.7615	-68.7615	-68.7615	-68.7615	-68.7615	-68.7615	-68.7615	22.7672	22.4508	22.6967	22.944
2008-03-18 04:16:00	12.8731	23.3808	22.6614	22.8732	22.8024	22.5911	22.6614	22.8201	22.7672	22.7672	22.8732	22.7672	22.6967	22.6438	22.7672	23.0327	-68.8033	-68.7615	-68.8033	-68.7615	-68.8033	-68.7615	-68.7615	-68.8033	-68.8033	-68.8033	-68.8033	-68.7615	-68.8033	-68.8033	-68.7615	-68.7615	-68.8033	-68.8033	-68.7615	-68.7615	-68.7615	-68.7615	-68.8033	22.7672	22.4508	22.6967	22.944
2008-03-18 04:16:20	12.8731	23.4101	22.6614	22.8555	22.8024	22.5911	22.6614	22.8201	22.7672	22.7672	22.8732	22.7672	22.6967	22.6262	22.7672	23.0327	-68.7615	-68.7615	-68.7615	-68.7615	-68.8033	-68.7615	-68.8033	-68.7615	-68.8033	-68.8033	-68.8033	-68.8033	-68.8033	-68.7615	-68.8033	-68.7615	-68.7615	-68.7615	-68.7615	-68.7197	-68.8033	-68.7615	-68.7615	22.7672	22.4508	22.679	22.9263
2008-03-18 04:16:40	12.8731	23.4101	22.6614	22.8555	22.7848	22.5911	22.6614	22.8201	22.7672	22.7672	22.8732	22.7672	22.6967	22.6262	22.7672	23.0327	-68.8033	-68.7197	-68.7615	-68.7615	-68.7615	-68.8033	-68.7615	-68.8033	-68.8033	-68.8033	-68.7615	-68.7615	-68.7615	-68.7615	-68.7615	-68.7615	-68.8033	-68.7615	-68.7615	-68.7615	-68.8033	-68.8033	-68.7615	22.7672	22.4508	22.6967	22.944
2008-03-18 04:17:00	12.8677	23.4101	22.679	22.8732	22.8024	22.5911	22.6614	22.8201	22.7672	22.7672	22.8732	22.7672	22.6967	22.6438	22.7672	23.0505	-68.7615	-68.7615	-68.7615	-68.7615	-68.7615	-68.7615	-68.7615	-68.7615	-68.7615	-68.7615	-68.7197	-68.8033	-68.7615	-68.8033	-68.8033	-68.7615	-68.7615	-68.7615	-68.8033	-68.7615	-68.7615	-68.7615	-68.8033	22.7672	22.4508	22.679	22.944
2008-03-18 04:17:20	12.8786	23.4101	22.6967	22.8732	22.8024	22.5911	22.6614	22.8378	22.7672	22.7672	22.8732	22.7672	22.6967	22.6438	22.7672	23.0327	-68.7615	-68.7615	-68.7615	-68.8033	-68.8033	-68.7615	-68.8033	-68.8033	-68.7615	-68.7615	-68.8033	-68.7615	-68.7615	-68.7615	-68.7615	-68.8033	-68.7615	-68.7615	-68.8033	-68.7615	-68.8033	-68.7197	-68.7615	22.7672	22.4508	22.6614	22.944
2008-03-18 04:17:40	12.8731	23.4372	22.679	22.8732	22.8024	22.5911	22.6614	22.8201	22.7672	22.7672	22.8732	22.7672	22.6967	22.6614	22.7672	23.0327	-68.8033	-68.7615	-68.7615	-68.7615	-68.8033	-68.7615	-68.7615	-68.7197	-68.7615	-68.8033	-68.7615	-68.7615	-68.7615	-68.7615	-68.7615	-68.7615	-68.7615	-68.7615	-68.7615	-68.7615	-68.7615	-68.7615	-68.7615	22.7672	22.4508	22.6614	22.944
2008-03-18 04:18:00	12.8731	23.4372	22.6967	22.8732	22.8024	22.5911	22.6614	22.8024	22.7672	22.7672	22.8732	22.7495	22.6967	22.6438	22.7672	23.015	-68.7615	-68.7615	-68.8033	-68.7615	-68.7615	-68.7615	-68.8033	-68.7615	-68.7615	-68.8033	-68.7615	-68.7615	-68.8033	-68.7615	-68.7615	-68.8033	-68.7615	-68.7615	-68.7615	-68.7615	-68.7615	-68.8033	-68.7615	22.7672	22.4508	22.6614	22.944
2008-03-18 04:18:20	12.8731	23.4372	22.6967	22.8555	22.8024	22.5911	22.6614	22.8201	22.7672	22.7672	22.8732	22.7672	22.6967	22.6438	22.7672	23.015	-68.7615	-68.7615	-68.7615	-68.7615	-68.7615	-68.8033	-68.8033	-68.7615	-68.8033	-68.8033	-68.8033	-68.7615	-68.7615	-68.7615	-68.7615	-68.7615	-68.7615	-68.8033	-68.7615	-68.8033	-68.7615	-68.8033	-68.7615	22.7672	22.4508	22.679	22.944
2008-03-18 04:18:40	12.8731	23.4666	22.679	22.8732	22.7848	22.5911	22.6614	22.8024	22.7672	22.7672	22.8732	22.7672	22.6967	22.6438	22.7672	23.015	-68.8033	-68.7615	-68.7615	-68.7615	-68.7615	-68.8033	-68.8033	-68.8033	-68.7615	-68.7615	-68.7615	-68.8033	-68.7615	-68.7197	-68.7615	-68.7615	-68.7615	-68.8033	-68.7615	-68.7615	-68.8033	-68.7615	-68.7615	22.7672	22.4508	22.6614	22.9263
2008-03-18 04:19:00	12.8731	23.4666	22.6614	22.8555	22.8024	22.5911	22.6614	22.8201	22.7672	22.7672	22.8732	22.7672	22.6967	22.6438	22.7672	23.015	-68.7615	-68.7615	-68.8033	-68.8033	-68.7615	-68.8033	-68.8033	-68.7615	-68.7615	-68.7615	-68.7615	-68.7615	-68.7615	-68.7615	-68.7615	-68.7615	-68.7615	-68.8033	-68.8033	-68.7615	-68.8033	-68.7615	-68.8033	22.7672	22.4508	22.6614	22.9086
2008-03-18 04:19:20	12.8731	23.4666	22.6614	22.8555	22.8024	22.5911	22.6614	22.8201	22.7672	22.7672	22.8732	22.7672	22.6967	22.6438	22.7672	23.015	-68.7615	-68.7615	-68.7615	-68.7615	-68.8033	-68.8033	-68.8033	-68.7615	-68.7615	-68.8033	-68.7615	-68.7615	-68.8033	-68.8033	-68.8033	-68.7615	-68.7615	-68.7615	-68.7615	-68.7615	-68.7615	-68.7615	-68.7615	22.7495	22.4508	22.679	22.9086
2008-03-18 04:19:40	12.8731	23.4666	22.6614	22.8555	22.8024	22.5911	22.6614	22.8024	22.7672	22.7672	22.8732	22.7672	22.6967	22.6262	22.7672	23.015	-68.7615	-68.7615	-68.8033	-68.7615	-68.8033	-68.7615	-68.7615	-68.7615	-68.8033	-68.8033	-68.7615	-68.7615	-68.7615	-68.8033	-68.7615	-68.8033	-68.7615	-68.7615	-68.7615	-68.7615	-68.7615	-68.7615	-68.7615	22.7672	22.4508	22.6614	22.9086
2008-03-18 04:20:00	12.8731	23.4666	22.6614	22.8555	22.8024	22.5911	22.6614	22.8024	22.7672	22.7672	22.8732	22.7672	22.6967	22.6438	22.7672	23.015	-68.8033	-68.8033	-68.8033	-68.7615	-68.7615	-68.7615	-68.7615	-68.7615	-68.7615	-68.7615	-68.7615	-68.8033	-68.8033	-68.7615	-68.7615	-68.8033	-68.7615	-68.7615	-68.7615	-68.7615	-68.7615	-68.8033	-68.7615	22.7495	22.4508	22.679	22.9086
2008-03-18 04:20:20	12.8731	23.4666	22.6614	22.8378	22.8024	22.5911	22.6614	22.8024	22.7672	22.7672	22.8732	22.7672	22.6967	22.6438	22.7672	23.015	-68.8033	-68.7615	-68.7615	-68.7615	-68.7615	-68.7615	-68.7615	-68.8033	-68.7615	-68.7615	-68.7615	-68.7615	-68.7615	-68.8033	-68.7615	-68.8033	-68.7615	-68.8033	-68.8033	-68.8033	-68.7197	-68.7615	-68.7615	22.7319	22.4508	22.6614	22.9086
2008-03-18 04:20:40	12.8677	23.496	22.679	22.8555	22.8024	22.5911	22.6614	22.8024	22.7672	22.7672	22.8732	22.7672	22.6967	22.6262	22.7672	23.015	-68.7615	-68.7615	-68.7615	-68.7615	-68.7615	-68.7615	-68.7615	-68.8033	-68.8033	-68.7615	-68.7615	-68.8033	-68.8033	-68.8033	-68.7615	-68.7615	-68.8033	-68.7615	-68.7615	-68.7615	-68.7615	-68.7615	-68.7615	22.7319	22.4508	22.679	22.9086
2008-03-18 04:21:00	12.8677	23.496	22.679	22.8378	22.8024	22.5911	22.6614	22.8201	22.7672	22.7672	22.8732	22.7672	22.6967	22.6262	22.7672	23.015	-68.7615	-68.8033	-68.7615	-68.7615	-68.7615	-68.8033	-68.7615	-68.7615	-68.7615	-68.7615	-68.8033	-68.7615	-68.7615	-68.8033	-68.8033	-68.7615	-68.7615	-68.8033	-68.7615	-68.7615	-68.8033	-68.7615	-68.7615	22.7319	22.4508	22.6614	22.9086
2008-03-18 04:21:20	12.8677	23.496	22.6614	22.8378	22.8024	22.5911	22.6614	22.8201	22.7672	22.7672	22.8732	22.7672	22.6967	22.6438	22.7672	23.015	-68.7615	-68.7615	-68.7615	-68.8033	-68.7615	-68.7615	-68.7615	-68.7615	-68.7615	-68.8033	-68.7615	-68.7615	-68.7615	-68.7615	-68.7615	-68.7615	-68.7615	-68.7615	-68.7615	-68.8033	-68.7615	-68.7615	-68.8033	22.7319	22.4508	22.6614	22.9086
2008-03-18 04:21:40	12.8731	23.5231	22.679	22.8378	22.8024	22.5911	22.6614	22.8201	22.7672	22.7672	22.8732	22.7672	22.6967	22.6262	22.7672	23.015	-68.7615	-68.7615	-68.7615	-68.8033	-68.7615	-68.7615	-68.7615	-68.7615	-68.7615	-68.8033	-68.7615	-68.7615	-68.7615	-68.8033	-68.7615	-68.7615	-68.7615	-68.7615	-68.8033	-68.7615	-68.7615	-68.7615	-68.7615	22.7319	22.4508	22.6614	22.9086
2008-03-18 04:22:00	12.8731	23.5231	22.679	22.8378	22.8024	22.5911	22.6614	22.8201	22.7672	22.7672	22.8732	22.7672	22.6967	22.6438	22.7672	23.015	-68.7615	-68.7615	-68.7615	-68.7615	-68.7615	-68.7615	-68.7615	-68.8033	-68.8033	-68.7615	-68.7615	-68.8033	-68.8033	-68.8033	-68.7615	-68.7197	-68.7615	-68.7615	-68.8033	-68.7615	-68.7615	-68.8033	-68.8033	22.7319	22.4508	22.6614	22.9086
2008-03-18 04:22:20	12.8731	23.5231	22.679	22.8378	22.8024	22.5911	22.6614	22.8201	22.7672	22.7672	22.8732	22.7672	22.6967	22.6262	22.7672	23.015	-68.8033	-68.8033	-68.8033	-68.7615	-68.8033	-68.8033	-68.7615	-68.8033	-68.8033	-68.7615	-68.8033	-68.7615	-68.8033	-68.7615	-68.8033	-68.8033	-68.8033	-68.8033	-68.7615	-68.7615	-68.8033	-68.7615	-68.7615	22.7495	22.4508	22.6614	22.9086
2008-03-18 04:22:40	12.8731	23.5231	22.679	22.8378	22.8024	22.5911	22.6614	22.8201	22.7672	22.7672	22.8732	22.7672	22.6967	22.6262	22.7672	23.015	-68.7615	-68.7615	-68.7615	-68.7615	-68.8033	-68.7615	-68.7615	-68.8033	-68.7615	-68.8033	-68.7615	-68.7615	-68.7615	-68.7615	-68.8033	-68.7615	-68.8033	-68.7615	-68.8033	-68.7615	-68.7615	-68.7615	-68.7615	22.7495	22.4508	22.6614	22.9086
2008-03-18 04:23:00	12.8731	23.5231	22.679	22.8555	22.8024	22.5911	22.6614	22.8024	22.7672	22.7672	22.8732	22.7672	22.6967	22.6262	22.7672	23.015	-68.7615	-68.8033	-68.7615	-68.8033	-68.7615	-68.8033	-68.7615	-68.8033	-68.7615	-68.7615	-68.7615	-68.7615	-68.7615	-68.7615	-68.7615	-68.8033	-68.8033	-68.7615	-68.7615	-68.8033	-68.7615	-68.7615	-68.7615	22.7319	22.4508	22.6614	22.9086
2008-03-18 04:23:20	12.8731	23.5525	22.6967	22.8378	22.8024	22.5911	22.6614	22.8024	22.7672	22.7672	22.8732	22.7672	22.6967	22.6262	22.7672	23.015	-68.8033	-68.8033	-68.8033	-68.8033	-68.8033	-68.7615	-68.7615	-68.8033	-68.8033	-68.7615	-68.7615	-68.8033	-68.7615	-68.8033	-68.7615	-68.7615	-68.8033	-68.7615	-68.8033	-68.7615	-68.7615	-68.7615	-68.7615	22.7495	22.4508	22.6614	22.9086
2008-03-18 04:23:40	12.8731	23.5525	22.6614	22.8378	22.8024	22.5911	22.6614	22.8201	22.7672	22.7672	22.8732	22.7672	22.6967	22.6262	22.7672	23.015	-68.8033	-68.7615	-68.7615	-68.7615	-68.7615	-68.8033	-68.8033	-68.8033	-68.7615	-68.7615	-68.8033	-68.7615	-68.7615	-68.7615	-68.7615	-68.8033	-68.7615	-68.7615	-68.7615	-68.7615	-68.7615	-68.7615	-68.8033	22.7495	22.4508	22.6614	22.9086
2008-03-18 04:24:00	12.8731	23.5525	22.679	22.8378	22.8024	22.5911	22.6614	22.8024	22.7672	22.7672	22.8732	22.7672	22.6967	22.6262	22.7672	23.015	-68.7615	-68.7615	-68.8033	-68.7615	-68.7615	-68.7615	-68.7615	-68.7615	-68.7615	-68.7615	-68.8033	-68.7615	-68.8033	-68.7615	-68.7615	-68.7615	-68.8033	-68.8033	-68.7197	-68.7615	-68.7615	-68.7615	-68.7197	22.7672	22.4508	22.6614	22.9086
2008-03-18 04:24:20	12.8731	23.5818	22.6967	22.8378	22.8024	22.5911	22.6614	22.8024	22.7672	22.7672	22.8732	22.7672	22.6967	22.6262	22.7672	23.015	-68.7615	-68.8033	-68.7615	-68.7615	-68.7615	-68.7615	-68.8033	-68.7615	-68.8033	-68.7615	-68.8033	-68.7615	-68.8033	-68.8033	-68.8033	-68.7615	-68.8033	-68.8033	-68.8033	-68.8033	-68.8033	-68.8033	-68.7615	22.7672	22.4508	22.6614	22.9086
2008-03-18 04:24:40	12.8731	23.5818	22.679	22.8555	22.8024	22.5911	22.6614	22.8201	22.7672	22.7672	22.8732	22.7672	22.6967	22.6262	22.7672	23.015	-68.8033	-68.8033	-68.8033	-68.7615	-68.7615	-68.7615	-68.7615	-68.7615	-68.7615	-68.8033	-68.8033	-68.7615	-68.7615	-68.8033	-68.8033	-68.7615	-68.7615	-68.7615	-68.8033	-68.7615	-68.7615	-68.7615	-68.7615	22.7672	22.4508	22.6614	22.9086
2008-03-18 04:25:00	12.8731	23.5818	22.6967	22.8555	22.8024	22.5911	22.6614	22.8024	22.7672	22.7672	22.8732	22.7672	22.6967	22.6438	22.7672	23.015	-68.7615	-68.7615	-68.7615	-68.8033	-68.7615	-68.8033	-68.7615	-68.7615	-68.7615	-68.8033	-68.7615	-68.7615	-68.7615	-68.7615	-68.8033	-68.7615	-68.8033	-68.7615	-68.8033	-68.8033	-68.7615	-68.8033	-68.8033	22.7672	22.4508	22.6614	22.9086
2008-03-18 04:25:20	12.8731	23.5818	22.679	22.8378	22.8024	22.5911	22.6614	22.8201	22.7672	22.7672	22.8732	22.7672	22.6967	22.6262	22.7672	23.015	-68.7615	-68.7615	-68.7615	-68.7615	-68.7615	-68.7615	-68.7615	-68.7615	-68.8033	-68.8033	-68.7615	-68.8033	-68.8033	-68.8033	-68.7615	-68.7615	-68.7615	-68.7615	-68.7615	-68.7615	-68.7615	-68.7615	-68.8033	22.7672	22.4508	22.6614	22.9086
2008-03-18 04:25:40	12.8731	23.5818	22.6967	22.8378	22.8024	22.5911	22.6614	22.8201	22.7672	22.7672	22.8732	22.7672	22.6967	22.6262	22.7672	23.015	-68.8033	-68.7615	-68.7615	-68.8033	-68.7615	-68.8033	-68.7615	-68.7615	-68.7615	-68.8033	-68.7615	-68.8033	-68.8033	-68.7615	-68.7615	-68.7615	-68.7615	-68.8033	-68.8033	-68.8033	-68.7615	-68.7615	-68.8033	22.7672	22.4508	22.6614	22.9086
2008-03-18 04:26:00	12.8731	23.5818	22.6967	22.8378	22.8024	22.5911	22.6614	22.8378	22.7672	22.7848	22.8732	22.7672	22.6967	22.6262	22.7672	23.015	-68.7615	-68.7615	-68.8033	-68.8033	-68.8033	-68.8033	-68.7615	-68.7615	-68.7615	-68.7615	-68.7615	-68.8033	-68.8033	-68.7615	-68.8033	-68.8033	-68.7615	-68.7615	-68.7615	-68.8033	-68.7615	-68.7615	-68.7615	22.7672	22.4508	22.6614	22.9086
2008-03-18 04:26:20	12.8731	23.6089	22.6967	22.8378	22.8024	22.5911	22.6614	22.8201	22.7672	22.8024	22.8732	22.7672	22.6967	22.6262	22.7672	23.015	-68.7615	-68.8033	-68.7615	-68.7615	-68.7615	-68.7615	-68.7615	-68.7615	-68.7615	-68.7615	-68.8033	-68.8033	-68.7615	-68.8033	-68.7615	-68.7615	-68.8033	-68.7615	-68.7615	-68.7615	-68.7615	-68.8033	-68.7615	22.7672	22.4508	22.6614	22.9086
2008-03-18 04:26:40	12.8731	23.6089	22.6967	22.8378	22.8024	22.5911	22.6614	22.8201	22.7672	22.7848	22.8732	22.7672	22.6967	22.6262	22.7672	23.015	-68.7615	-68.7615	-68.7615	-68.7615	-68.7615	-68.7615	-68.8033	-68.7615	-68.7615	-68.8033	-68.7615	-68.8033	-68.8033	-68.7615	-68.7615	-68.7615	-68.7615	-68.8033	-68.7615	-68.8033	-68.8033	-68.7615	-68.8033	22.7672	22.4508	22.6614	22.9086
2008-03-18 04:27:00	12.8731	23.6089	22.6967	22.8555	22.8024	22.5911	22.6614	22.8378	22.7672	22.7848	22.8732	22.7672	22.6967	22.6438	22.7672	23.015	-68.8033	-68.8033	-68.7615	-68.7615	-68.7615	-68.8033	-68.7615	-68.8033	-68.7615	-68.7615	-68.7197	-68.7615	-68.8033	-68.7197	-68.8033	-68.8033	-68.8033	-68.7615	-68.7615	-68.8033	-68.7615	-68.8033	-68.8033	22.7672	22.4508	22.6614	22.9086
2008-03-18 04:27:20	12.8731	23.6383	22.6967	22.8555	22.8024	22.5911	22.6614	22.8378	22.7672	22.7848	22.8732	22.7672	22.6967	22.6438	22.7848	23.015	-68.7615	-68.8033	-68.7615	-68.8033	-68.7615	-68.8033	-68.8033	-68.7615	-68.7615	-68.8033	-68.7615	-68.7615	-68.8033	-68.7615	-68.7615	-68.7615	-68.7615	-68.7615	-68.7615	-68.8033	-68.7615	-68.8033	-68.8033	22.7672	22.4508	22.6614	22.9086
2008-03-18 04:27:40	12.8731	23.6383	22.6967	22.8555	22.8024	22.5911	22.6614	22.8378	22.7672	22.7848	22.8732	22.7672	22.7143	22.6438	22.7672	23.015	-68.7615	-68.7615	-68.8033	-68.7615	-68.7615	-68.7615	-68.7615	-68.7615	-68.8033	-68.8033	-68.7615	-68.7615	-68.7615	-68.8033	-68.7615	-68.7615	-68.7615	-68.7615	-68.7615	-68.7615	-68.7615	-68.7615	-68.8033	22.7672	22.4508	22.6614	22.9086
2008-03-18 04:28:00	12.8731	23.6383	22.6967	22.8555	22.8024	22.5911	22.6614	22.8378	22.7672	22.7848	22.8732	22.7672	22.6967	22.6614	22.7848	23.015	-68.7197	-68.8033	-68.7615	-68.7615	-68.7615	-68.7615	-68.8033	-68.8033	-68.8033	-68.7615	-68.7615	-68.8033	-68.8033	-68.7615	-68.7615	-68.7615	-68.8033	-68.7615	-68.8033	-68.7615	-68.7615	-68.8033	-68.7615	22.7672	22.4508	22.6614	22.9086
2008-03-18 04:28:20	12.8731	23.6383	22.6967	22.8732	22.8024	22.5911	22.6614	22.8378	22.7672	22.8024	22.8732	22.7672	22.7143	22.6614	22.7848	23.015	-68.7615	-68.7615	-68.7615	-68.8033	-68.7615	-68.7615	-68.7615	-68.7615	-68.8033	-68.7615	-68.7615	-68.7615	-68.8033	-68.8033	-68.7615	-68.8033	-68.7615	-68.7615	-68.8033	-68.7615	-68.7615	-68.8033	-68.7615	22.7672	22.4508	22.6614	22.9086
2008-03-18 04:28:40	12.8731	23.6677	22.6967	22.8555	22.8024	22.5911	22.6614	22.8378	22.7848	22.8024	22.8732	22.7672	22.7143	22.6614	22.7848	23.0327	-68.7615	-68.8033	-68.8033	-68.7615	-68.7615	-68.7615	-68.7615	-68.7615	-68.8033	-68.7615	-68.7615	-68.7615	-68.7615	-68.7615	-68.7615	-68.8033	-68.8033	-68.7615	-68.8033	-68.8033	-68.7615	-68.7615	-68.7197	22.7672	22.4508	22.6614	22.9086
2008-03-18 04:29:00	12.8731	23.6677	22.6967	22.8732	22.8024	22.5911	22.6614	22.8378	22.7672	22.8024	22.8732	22.7672	22.7319	22.6614	22.7848	23.015	-68.7615	-68.8033	-68.8033	-68.7615	-68.7615	-68.7615	-68.8033	-68.7615	-68.8033	-68.8033	-68.7615	-68.7615	-68.8033	-68.8033	-68.7615	-68.7615	-68.8033	-68.8033	-68.8033	-68.7615	-68.7615	-68.7615	-68.7615	22.7672	22.4508	22.6614	22.9086
2008-03-18 04:29:20	12.8731	23.6677	22.6967	22.8732	22.8024	22.5911	22.6614	22.8378	22.7848	22.8024	22.8732	22.7672	22.7319	22.6614	22.8024	23.015	-68.7615	-68.8033	-68.7615	-68.8033	-68.7615	-68.7615	-68.7615	-68.7615	-68.7615	-68.7615	-68.8033	-68.7615	-68.7615	-68.7615	-68.7615	-68.7615	-68.7615	-68.8033	-68.7197	-68.8033	-68.8033	-68.7197	-68.8033	22.7672	22.4508	22.6614	22.9086
2008-03-18 04:29:40	12.8731	23.6677	22.6967	22.8732	22.8024	22.5911	22.6614	22.8378	22.7848	22.8024	22.8732	22.7672	22.7319	22.6614	22.8024	23.0327	-68.7615	-68.7615	-68.7615	-68.7615	-68.7615	-68.7615	-68.7615	-68.7615	-68.7615	-68.7615	-68.8033	-68.8033	-68.8033	-68.7615	-68.8033	-68.7615	-68.8033	-68.7615	-68.7615	-68.8033	-68.7615	-68.8033	-68.8033	22.7672	22.4508	22.6614	22.9086
2008-03-18 04:30:00	12.8731	23.6971	22.6967	22.8732	22.8024	22.5911	22.6614	22.8378	22.7848	22.8024	22.8732	22.7672	22.7319	22.6614	22.8024	23.0505	-68.7615	-68.8033	-68.8033	-68.7615	-68.7615	-68.8033	-68.7615	-68.7615	-68.7615	-68.7615	-68.8033	-68.7615	-68.7615	-68.7615	-68.8033	-68.7615	-68.7615	-68.7615	-68.7615	-68.8033	-68.7615	-68.7615	-68.7615	22.7672	22.4508	22.6614	22.944
2008-03-18 04:30:20	12.8677	23.6971	22.6967	22.8732	22.8024	22.5911	22.6614	22.8378	22.8024	22.8024	22.8909	22.7848	22.7319	22.6614	22.8024	23.0505	-68.7615	-68.7615	-68.8033	-68.7615	-68.7615	-68.7615	-68.7615	-68.8033	-68.7615	-68.8033	-68.7615	-68.7615	-68.7615	-68.7615	-68.7615	-68.7615	-68.7615	-68.7615	-68.7615	-68.7615	-68.7615	-68.8033	-68.7615	22.7672	22.4508	22.6614	22.9263
2008-03-18 04:30:40	12.8731	23.6971	22.6967	22.8732	22.8024	22.5911	22.6614	22.8378	22.8024	22.8024	22.9086	22.7848	22.7319	22.6614	22.8024	23.0505	-68.7615	-68.7615	-68.7615	-68.7615	-68.7615	-68.7615	-68.8033	-68.7615	-68.7615	-68.8033	-68.7615	-68.7615	-68.8033	-68.7615	-68.8033	-68.7615	-68.7197	-68.7615	-68.8033	-68.7615	-68.7615	-68.8033	-68.8033	22.7672	22.4508	22.6614	22.944
2008-03-18 04:31:00	12.8731	23.6971	22.6967	22.8732	22.8024	22.5911	22.6614	22.8378	22.8024	22.8024	22.8909	22.7848	22.7319	22.6614	22.8024	23.0505	-68.7615	-68.8033	-68.7615	-68.7615	-68.8033	-68.7615	-68.8033	-68.8033	-68.7615	-68.7615	-68.7615	-68.7615	-68.8033	-68.7615	-68.7615	-68.7615	-68.7615	-68.7615	-68.7615	-68.7615	-68.8033	-68.7615	-68.7615	22.7672	22.4508	22.679	22.9263
2008-03-18 04:31:20	12.8731	23.6971	22.7143	22.8732	22.8024	22.6087	22.6614	22.8378	22.8024	22.8024	22.8909	22.8024	22.7319	22.6614	22.8024	23.0505	-68.8033	-68.8033	-68.7615	-68.7615	-68.8033	-68.7615	-68.7615	-68.8033	-68.7615	-68.7615	-68.7615	-68.7615	-68.8033	-68.7615	-68.7615	-68.8033	-68.8033	-68.7615	-68.8033	-68.8033	-68.8033	-68.8033	-68.8033	22.7672	22.4684	22.6614	22.944
2008-03-18 04:31:40	12.8731	23.6971	22.6967	22.8732	22.8201	22.5911	22.6614	22.8378	22.8024	22.8024	22.9086	22.7848	22.7319	22.6614	22.8024	23.0505	-68.7615	-68.8033	-68.7615	-68.7615	-68.8033	-68.7615	-68.8033	-68.7615	-68.8033	-68.8033	-68.7615	-68.7615	-68.8033	-68.7615	-68.8033	-68.7615	-68.7615	-68.7615	-68.8033	-68.7615	-68.8033	-68.8033	-68.7615	22.7672	22.4684	22.6614	22.944
2008-03-18 04:32:00	12.8731	23.6971	22.6967	22.8732	22.8201	22.6087	22.6614	22.8378	22.8024	22.8024	22.9086	22.8024	22.7319	22.6614	22.8024	23.0505	-68.8033	-68.7615	-68.8033	-68.7615	-68.7615	-68.8033	-68.8033	-68.8033	-68.8033	-68.7615	-68.7615	-68.7197	-68.7615	-68.7615	-68.8033	-68.7615	-68.8033	-68.8033	-68.8033	-68.8033	-68.7615	-68.7615	-68.7615	22.7672	22.4859	22.679	22.944
2008-03-18 04:32:20	12.8677	23.7242	22.6967	22.8732	22.8024	22.6262	22.679	22.8378	22.8024	22.8024	22.9086	22.8024	22.7319	22.6614	22.8024	23.0505	-68.7615	-68.7615	-68.8033	-68.7615	-68.8033	-68.8033	-68.8033	-68.7615	-68.8033	-68.8033	-68.7615	-68.7615	-68.7615	-68.8033	-68.7615	-68.8033	-68.7615	-68.8033	-68.8033	-68.7615	-68.7615	-68.7615	-68.7615	22.7848	22.4859	22.6614	22.944
2008-03-18 04:32:40	12.8731	23.7242	22.7319	22.8732	22.8024	22.6262	22.679	22.8378	22.8024	22.8024	22.9086	22.8024	22.7319	22.6614	22.8024	23.0505	-68.7615	-68.8033	-68.7197	-68.7615	-68.8033	-68.7615	-68.7615	-68.8033	-68.7615	-68.8033	-68.7615	-68.7615	-68.7615	-68.7615	-68.7615	-68.8033	-68.7615	-68.7615	-68.8033	-68.7615	-68.8033	-68.8033	-68.7615	22.7848	22.4859	22.679	22.944
2008-03-18 04:33:00	12.8731	23.7242	22.7143	22.8732	22.8201	22.6262	22.679	22.8555	22.8024	22.8024	22.9086	22.8024	22.7319	22.6614	22.8024	23.0505	-68.7615	-68.8033	-68.7615	-68.7615	-68.7615	-68.7615	-68.7615	-68.7615	-68.8033	-68.8033	-68.7615	-68.7615	-68.7615	-68.8033	-68.8033	-68.7615	-68.7615	-68.7615	-68.8033	-68.7615	-68.7615	-68.7615	-68.7615	22.8024	22.4859	22.6967	22.944
2008-03-18 04:33:20	12.8731	23.7535	22.7319	22.8732	22.8201	22.6262	22.679	22.8378	22.8024	22.8024	22.9086	22.8024	22.7319	22.6614	22.8024	23.0505	-68.7615	-68.8033	-68.8033	-68.7615	-68.7615	-68.7615	-68.7615	-68.7615	-68.7615	-68.8033	-68.8033	-68.7615	-68.7615	-68.7615	-68.8033	-68.7615	-68.7615	-68.7615	-68.7615	-68.8033	-68.7615	-68.7615	-68.7615	22.8024	22.4859	22.6967	22.944
2008-03-18 04:33:40	12.8731	23.7535	22.7319	22.8732	22.8201	22.6262	22.6967	22.8378	22.8024	22.8024	22.9086	22.8024	22.7319	22.6614	22.8024	23.0505	-68.7615	-68.7615	-68.8033	-68.7615	-68.8033	-68.8033	-68.7615	-68.7615	-68.7615	-68.7615	-68.7615	-68.7615	-68.7615	-68.7615	-68.8033	-68.7615	-68.7615	-68.7615	-68.8033	-68.8033	-68.7615	-68.7197	-68.8033	22.8024	22.4859	22.6967	22.944
2008-03-18 04:34:00	12.8731	23.7535	22.7319	22.8732	22.8378	22.6262	22.6967	22.8732	22.8024	22.8024	22.9086	22.8024	22.7319	22.6614	22.8024	23.0505	-68.7615	-68.8033	-68.7615	-68.7615	-68.7615	-68.8033	-68.8033	-68.8033	-68.7615	-68.7615	-68.8033	-68.7615	-68.8033	-68.8033	-68.7615	-68.8033	-68.7615	-68.7615	-68.7615	-68.7615	-68.7615	-68.7615	-68.7615	22.8024	22.4859	22.6967	22.944
2008-03-18 04:34:20	12.8731	23.7535	22.7319	22.8732	22.8201	22.6262	22.6967	22.8732	22.8024	22.8024	22.9086	22.8024	22.7319	22.6614	22.8024	23.0505	-68.7615	-68.8033	-68.8033	-68.8033	-68.7615	-68.7615	-68.7615	-68.7615	-68.8033	-68.7615	-68.7615	-68.7615	-68.7615	-68.7615	-68.8033	-68.8033	-68.7615	-68.7615	-68.8033	-68.8033	-68.8033	-68.8033	-68.7615	22.8024	22.4859	22.6967	22.944
2008-03-18 04:34:40	12.8731	23.7535	22.7319	22.8732	22.8378	22.6262	22.6967	22.8555	22.8024	22.8024	22.9086	22.8024	22.7319	22.6614	22.8201	23.0505	-68.7615	-68.7197	-68.7615	-68.8033	-68.8033	-68.7615	-68.7615	-68.7615	-68.7615	-68.7197	-68.7615	-68.8033	-68.8033	-68.8033	-68.7615	-68.8033	-68.7615	-68.7615	-68.7615	-68.7615	-68.7615	-68.7615	-68.7615	22.8024	22.4859	22.6967	22.944
2008-03-18 04:35:00	12.8677	23.7535	22.7319	22.8909	22.8378	22.6262	22.6967	22.8732	22.8024	22.8024	22.9086	22.8024	22.7319	22.679	22.8201	23.0505	-68.7615	-68.7615	-68.8033	-68.7615	-68.7615	-68.8033	-68.7615	-68.7615	-68.8033	-68.7615	-68.7615	-68.7615	-68.7615	-68.7615	-68.7615	-68.7615	-68.7615	-68.8033	-68.7615	-68.8033	-68.8033	-68.7615	-68.8033	22.8024	22.4859	22.6967	22.944
2008-03-18 04:35:20	12.8731	23.7829	22.7319	22.8909	22.8378	22.6262	22.6967	22.8732	22.8024	22.8024	22.9086	22.8024	22.7319	22.679	22.8024	23.0683	-68.8033	-68.7615	-68.8033	-68.7615	-68.7615	-68.8033	-68.7615	-68.8033	-68.7615	-68.7615	-68.7197	-68.7615	-68.8033	-68.7615	-68.7615	-68.7615	-68.8033	-68.8033	-68.7615	-68.8033	-68.8033	-68.7615	-68.7615	22.8024	22.4859	22.6967	22.944
2008-03-18 04:35:40	12.8731	23.7829	22.7319	22.9086	22.8378	22.6262	22.6967	22.8732	22.8024	22.8201	22.9086	22.8024	22.7319	22.679	22.8201	23.0683	-68.8033	-68.7615	-68.7615	-68.7615	-68.7615	-68.7615	-68.7615	-68.7615	-68.7615	-68.7615	-68.7615	-68.7615	-68.7615	-68.7615	-68.7615	-68.7615	-68.7615	-68.7615	-68.7615	-68.8033	-68.7615	-68.7615	-68.7615	22.8024	22.4859	22.6967	22.944
2008-03-18 04:36:00	12.8677	23.7829	22.7319	22.9086	22.8378	22.6262	22.6967	22.8732	22.8024	22.8024	22.9086	22.8024	22.7319	22.679	22.8378	23.0505	-68.7615	-68.8033	-68.7615	-68.7197	-68.7615	-68.7615	-68.8033	-68.7615	-68.7615	-68.7615	-68.8033	-68.7615	-68.7615	-68.8033	-68.7615	-68.7615	-68.7615	-68.7615	-68.7615	-68.7615	-68.7615	-68.7615	-68.7615	22.8024	22.4859	22.6967	22.9617
2008-03-18 04:36:20	12.8677	23.7829	22.7319	22.9086	22.8378	22.6262	22.7143	22.8732	22.8024	22.8024	22.9263	22.8024	22.7319	22.6967	22.8378	23.0861	-68.8033	-68.7615	-68.7197	-68.7615	-68.7615	-68.7615	-68.7615	-68.7615	-68.8033	-68.7615	-68.7615	-68.7615	-68.7615	-68.7615	-68.7615	-68.7615	-68.7615	-68.7615	-68.7197	-68.7615	-68.7615	-68.7615	-68.7615	22.8024	22.4859	22.6967	22.944
2008-03-18 04:36:40	12.8677	23.7829	22.7319	22.9086	22.8378	22.6262	22.7319	22.8732	22.8024	22.8024	22.9263	22.8024	22.7319	22.6967	22.8378	23.0861	-68.7197	-68.7615	-68.8033	-68.7615	-68.8033	-68.8033	-68.7615	-68.7615	-68.8033	-68.8033	-68.8033	-68.8033	-68.8033	-68.8033	-68.7615	-68.7615	-68.7615	-68.7615	-68.7615	-68.7615	-68.7615	-68.7197	-68.7615	22.8024	22.4859	22.6967	22.9794
2008-03-18 04:37:00	12.8731	23.8123	22.7319	22.9086	22.8378	22.6262	22.7143	22.8732	22.8201	22.8024	22.944	22.8024	22.7319	22.6967	22.8378	23.0861	-68.7615	-68.7615	-68.8033	-68.8033	-68.8033	-68.8033	-68.8033	-68.7615	-68.7615	-68.8033	-68.7615	-68.7615	-68.8033	-68.8033	-68.8033	-68.8033	-68.7615	-68.7615	-68.7615	-68.7615	-68.8033	-68.7615	-68.8033	22.8024	22.5033	22.7319	22.9794
2008-03-18 04:37:20	12.8731	23.8123	22.7319	22.9086	22.8378	22.6262	22.7319	22.8732	22.8024	22.8024	22.9263	22.8024	22.7319	22.6967	22.8378	23.0861	-68.7615	-68.8033	-68.7197	-68.8033	-68.7615	-68.7615	-68.7615	-68.7197	-68.7615	-68.8033	-68.7615	-68.8033	-68.7615	-68.7615	-68.8033	-68.8033	-68.8033	-68.7615	-68.7615	-68.8033	-68.7615	-68.7615	-68.7615	22.8024	22.5033	22.7143	22.9794
2008-03-18 04:37:40	12.8731	23.8123	22.7319	22.9086	22.8378	22.6262	22.7319	22.8732	22.8024	22.8201	22.944	22.8024	22.7495	22.6967	22.8378	23.0861	-68.7615	-68.7615	-68.8033	-68.7615	-68.7615	-68.8033	-68.7615	-68.7615	-68.7615	-68.7615	-68.7615	-68.7615	-68.7615	-68.7615	-68.7615	-68.8033	-68.7615	-68.8033	-68.7615	-68.7615	-68.7615	-68.8033	-68.7615	22.8024	22.5209	22.7143	22.9794
2008-03-18 04:38:00	12.8731	23.8123	22.7319	22.9086	22.8378	22.6262	22.7319	22.8732	22.8024	22.8024	22.9263	22.8201	22.7495	22.6967	22.8378	23.0861	-68.7615	-68.8033	-68.7615	-68.7615	-68.7615	-68.7615	-68.7615	-68.8033	-68.7615	-68.7615	-68.7615	-68.7197	-68.8033	-68.7615	-68.7615	-68.7615	-68.8033	-68.8033	-68.7615	-68.7615	-68.8033	-68.7615	-68.7615	22.8024	22.5033	22.7143	22.9794
2008-03-18 04:38:20	12.8731	23.8123	22.7319	22.9086	22.8378	22.6262	22.7319	22.8732	22.8024	22.8201	22.944	22.8024	22.7495	22.6967	22.8378	23.0861	-68.8033	-68.7615	-68.7615	-68.7615	-68.7615	-68.7615	-68.7197	-68.7615	-68.7615	-68.7615	-68.8033	-68.8033	-68.8033	-68.7615	-68.7197	-68.7615	-68.7615	-68.7615	-68.7615	-68.7615	-68.7615	-68.7615	-68.8033	22.8201	22.5209	22.7319	22.9794
2008-03-18 04:38:40	12.8786	23.8123	22.7319	22.9086	22.8378	22.6262	22.7319	22.8732	22.8024	22.8378	22.944	22.8201	22.7495	22.6967	22.8378	23.0861	-68.7615	-68.7615	-68.7615	-68.7615	-68.7615	-68.7615	-68.8033	-68.8033	-68.7615	-68.8033	-68.7615	-68.8033	-68.8033	-68.7615	-68.7615	-68.7615	-68.7615	-68.8033	-68.8033	-68.7615	-68.7615	-68.7615	-68.7615	22.8024	22.5209	22.7319	22.9794
2008-03-18 04:39:00	12.8731	23.8394	22.7319	22.9263	22.8378	22.6262	22.7319	22.8732	22.8201	22.8378	22.944	22.8378	22.7672	22.6967	22.8378	23.0861	-68.7615	-68.7615	-68.7615	-68.8033	-68.8033	-68.7615	-68.7615	-68.7615	-68.7615	-68.8033	-68.7615	-68.7615	-68.7615	-68.7615	-68.7615	-68.8033	-68.7615	-68.8033	-68.7615	-68.7615	-68.7615	-68.7615	-68.7615	22.8201	22.5033	22.7319	22.9794
2008-03-18 04:39:20	12.8731	23.8394	22.7319	22.944	22.8732	22.6438	22.7319	22.8732	22.8024	22.8378	22.944	22.8378	22.7672	22.7143	22.8555	23.0861	-68.7615	-68.8033	-68.7615	-68.7615	-68.8033	-68.7615	-68.7615	-68.8033	-68.7615	-68.7615	-68.7615	-68.7615	-68.8033	-68.7615	-68.8033	-68.8033	-68.7615	-68.7615	-68.7615	-68.7615	-68.7615	-68.7615	-68.7615	22.8024	22.5209	22.7319	22.9794
2008-03-18 04:39:40	12.8731	23.8394	22.7319	22.944	22.8555	22.6262	22.7319	22.8732	22.8024	22.8378	22.944	22.8378	22.7672	22.6967	22.8555	23.0861	-68.7615	-68.7615	-68.8033	-68.7615	-68.7615	-68.7615	-68.8033	-68.7615	-68.7615	-68.7615	-68.7615	-68.7615	-68.7615	-68.7615	-68.7615	-68.7615	-68.7615	-68.8033	-68.7615	-68.7615	-68.7615	-68.7615	-68.7615	22.8378	22.5209	22.7319	22.9794
2008-03-18 04:40:00	12.8731	23.8394	22.7495	22.944	22.8732	22.6438	22.7319	22.8732	22.8201	22.8378	22.944	22.8378	22.7672	22.6967	22.8555	23.0861	-68.7615	-68.7615	-68.8033	-68.7615	-68.8033	-68.7615	-68.7615	-68.7615	-68.7615	-68.8033	-68.7615	-68.8033	-68.7615	-68.7197	-68.7615	-68.8033	-68.8033	-68.7615	-68.7615	-68.7615	-68.8033	-68.8033	-68.7615	22.8378	22.5209	22.7319	22.9972
2008-03-18 04:40:20	12.8731	23.8688	22.7495	22.944	22.8732	22.6614	22.7319	22.8909	22.8378	22.8378	22.944	22.8378	22.7672	22.7319	22.8555	23.0861	-68.7615	-68.7615	-68.7615	-68.8033	-68.7615	-68.7615	-68.8033	-68.7615	-68.7615	-68.7615	-68.8033	-68.8033	-68.8033	-68.8033	-68.7615	-68.8033	-68.7615	-68.8033	-68.7615	-68.7615	-68.8033	-68.7197	-68.8033	22.8378	22.5209	22.7319	22.9972
2008-03-18 04:40:40	12.8731	23.8688	22.7672	22.944	22.8732	22.6614	22.7319	22.8909	22.8201	22.8378	22.944	22.8378	22.7672	22.7143	22.8732	23.0861	-68.7615	-68.8033	-68.7615	-68.7615	-68.8033	-68.7615	-68.7615	-68.7615	-68.7615	-68.8033	-68.8033	-68.7615	-68.8033	-68.8033	-68.7615	-68.7615	-68.7615	-68.8033	-68.8033	-68.7615	-68.8033	-68.7615	-68.7615	22.8378	22.5209	22.7319	23.015
2008-03-18 04:41:00	12.8731	23.8688	22.7672	22.944	22.8732	22.6614	22.7319	22.8909	22.8378	22.8378	22.944	22.8378	22.7672	22.7319	22.8732	23.0861	-68.7615	-68.8033	-68.7615	-68.8033	-68.7615	-68.8033	-68.7615	-68.7615	-68.7615	-68.8033	-68.7615	-68.7615	-68.8033	-68.7615	-68.8033	-68.7615	-68.8033	-68.7615	-68.8033	-68.7615	-68.8033	-68.8033	-68.8033	22.8378	22.5209	22.7319	23.015
2008-03-18 04:41:20	12.8731	23.8688	22.7672	22.944	22.8732	22.6614	22.7495	22.9086	22.8378	22.8378	22.944	22.8378	22.7672	22.7319	22.8732	23.0861	-68.8033	-68.7615	-68.8033	-68.7615	-68.7615	-68.7615	-68.7615	-68.8033	-68.8033	-68.7615	-68.7615	-68.8033	-68.7615	-68.7615	-68.7615	-68.7615	-68.7615	-68.7615	-68.7615	-68.8033	-68.7615	-68.8033	-68.8033	22.8378	22.5209	22.7319	23.015
2008-03-18 04:41:40	12.8731	23.8688	22.7672	22.944	22.8732	22.6614	22.7319	22.9086	22.8378	22.8378	22.944	22.8378	22.7672	22.7319	22.8732	23.0861	-68.8033	-68.7615	-68.7615	-68.7615	-68.8033	-68.7615	-68.8033	-68.7615	-68.7615	-68.7615	-68.7615	-68.7615	-68.7615	-68.8033	-68.7615	-68.7615	-68.7615	-68.8033	-68.7615	-68.7615	-68.8033	-68.7615	-68.7615	22.8378	22.5209	22.7319	23.015
2008-03-18 04:42:00	12.8731	23.8688	22.7672	22.944	22.8732	22.6614	22.7495	22.9086	22.8378	22.8378	22.944	22.8378	22.7672	22.7319	22.8732	23.0861	-68.7615	-68.7615	-68.7615	-68.7615	-68.8033	-68.8033	-68.8033	-68.8033	-68.8033	-68.7615	-68.7615	-68.8033	-68.7615	-68.7615	-68.8033	-68.7615	-68.7615	-68.8033	-68.7615	-68.8033	-68.7615	-68.7615	-68.7615	22.8378	22.5209	22.7319	23.015
2008-03-18 04:42:20	12.8731	23.8981	22.7672	22.944	22.8732	22.6614	22.7672	22.9086	22.8378	22.8378	22.944	22.8378	22.7672	22.7319	22.8732	23.1039	-68.7197	-68.7615	-68.7615	-68.7615	-68.8033	-68.7615	-68.7615	-68.7615	-68.8033	-68.8033	-68.7615	-68.8033	-68.8033	-68.7615	-68.8033	-68.8033	-68.7615	-68.7615	-68.7615	-68.7615	-68.7197	-68.8033	-68.8033	22.8378	22.5209	22.7319	23.015
2008-03-18 04:42:40	12.8786	23.8981	22.7672	22.944	22.8732	22.6614	22.7495	22.9086	22.8378	22.8555	22.944	22.8555	22.7672	22.7319	22.8732	23.0861	-68.7615	-68.8033	-68.7615	-68.7615	-68.7615	-68.8033	-68.7615	-68.7615	-68.8033	-68.7615	-68.7615	-68.8033	-68.8033	-68.7615	-68.8033	-68.7615	-68.8033	-68.7615	-68.7615	-68.7615	-68.7615	-68.8033	-68.7615	22.8378	22.5209	22.7319	23.015
2008-03-18 04:43:00	12.8731	23.8981	22.7672	22.944	22.8732	22.6614	22.7672	22.9086	22.8378	22.8555	22.944	22.8555	22.7672	22.7319	22.8732	23.1217	-68.7615	-68.7615	-68.7615	-68.7615	-68.7615	-68.7615	-68.8033	-68.8033	-68.8033	-68.7615	-68.7615	-68.7615	-68.8033	-68.8033	-68.8033	-68.7615	-68.8033	-68.7615	-68.7615	-68.8033	-68.7615	-68.7615	-68.7615	22.8378	22.5209	22.7672	23.015
2008-03-18 04:43:20	12.8731	23.8981	22.7672	22.944	22.8732	22.6614	22.7672	22.9086	22.8378	22.8732	22.9617	22.8555	22.7672	22.7319	22.8732	23.1039	-68.8033	-68.8033	-68.8033	-68.8033	-68.7615	-68.7615	-68.7615	-68.7615	-68.8033	-68.8033	-68.8033	-68.7615	-68.8033	-68.7197	-68.7615	-68.8033	-68.7615	-68.8033	-68.7615	-68.8033	-68.7615	-68.8033	-68.7615	22.8378	22.5209	22.7319	23.015
2008-03-18 04:43:40	12.8731	23.8981	22.7672	22.944	22.8732	22.6614	22.7672	22.9086	22.8378	22.8555	22.944	22.8732	22.8024	22.7319	22.8732	23.1039	-68.7615	-68.7615	-68.7615	-68.8033	-68.7615	-68.7615	-68.8033	-68.7615	-68.7615	-68.7615	-68.8033	-68.7615	-68.7615	-68.7615	-68.7615	-68.7615	-68.7615	-68.8033	-68.8033	-68.8033	-68.7615	-68.8033	-68.7615	22.8555	22.5209	22.7672	23.015
2008-03-18 04:44:00	12.8731	23.9275	22.7672	22.944	22.8732	22.6614	22.7672	22.9086	22.8378	22.8732	22.9617	22.8555	22.8024	22.7319	22.8732	23.1217	-68.8033	-68.7615	-68.7615	-68.7615	-68.8033	-68.7615	-68.7615	-68.8033	-68.7615	-68.8033	-68.7615	-68.7615	-68.7615	-68.8033	-68.7615	-68.7615	-68.7615	-68.8033	-68.8033	-68.7615	-68.7615	-68.8033	-68.7615	22.8732	22.5209	22.7672	23.015
2008-03-18 04:44:20	12.8731	23.9275	22.7672	22.944	22.8732	22.6614	22.7672	22.9086	22.8378	22.8732	22.9617	22.8732	22.7848	22.7319	22.8732	23.1217	-68.7615	-68.7615	-68.8033	-68.8033	-68.7615	-68.8033	-68.7615	-68.7615	-68.7615	-68.7615	-68.7615	-68.8033	-68.7615	-68.8033	-68.7615	-68.7615	-68.7615	-68.8033	-68.7615	-68.8033	-68.8033	-68.7615	-68.8033	22.8732	22.5385	22.7672	23.015
2008-03-18 04:44:40	12.8731	23.9275	22.7672	22.944	22.8732	22.6614	22.7672	22.9086	22.8378	22.8732	22.9794	22.8555	22.8024	22.7319	22.8732	23.1217	-68.7615	-68.7615	-68.8033	-68.8033	-68.7615	-68.7615	-68.7615	-68.7615	-68.7615	-68.7615	-68.7615	-68.8033	-68.8033	-68.7615	-68.8033	-68.7615	-68.7615	-68.7615	-68.7615	-68.7615	-68.7615	-68.7615	-68.7615	22.8555	22.5209	22.7672	23.015
2008-03-18 04:45:00	12.8731	23.9275	22.7848	22.944	22.8732	22.6614	22.7672	22.9086	22.8555	22.8732	22.9794	22.8732	22.8024	22.7319	22.8732	23.1217	-68.8033	-68.7615	-68.8033	-68.8033	-68.8033	-68.7615	-68.8033	-68.7615	-68.8033	-68.7615	-68.8033	-68.7615	-68.8033	-68.7615	-68.7615	-68.8033	-68.7615	-68.7615	-68.7615	-68.7615	-68.7197	-68.8033	-68.8033	22.8732	22.5209	22.7672	23.015
2008-03-18 04:45:20	12.8731	23.9275	22.7848	22.944	22.8732	22.6614	22.7672	22.9086	22.8555	22.8732	22.9794	22.8732	22.8024	22.7495	22.8732	23.1217	-68.7615	-68.8033	-68.7615	-68.7615	-68.8033	-68.7615	-68.7615	-68.8033	-68.8033	-68.7615	-68.7615	-68.7615	-68.7615	-68.7615	-68.8033	-68.7615	-68.8033	-68.7615	-68.8033	-68.8033	-68.7615	-68.7615	-68.7615	22.8732	22.556	22.7672	23.015
2008-03-18 04:45:40	12.8731	23.9569	22.7848	22.9794	22.8732	22.6614	22.7672	22.9263	22.8378	22.8732	22.9794	22.8732	22.8024	22.7319	22.8732	23.1217	-68.7615	-68.8033	-68.7615	-68.7615	-68.7615	-68.7615	-68.7197	-68.8033	-68.8033	-68.8033	-68.8033	-68.7615	-68.8033	-68.7615	-68.7615	-68.7615	-68.7615	-68.7615	-68.8033	-68.7615	-68.7615	-68.7615	-68.8033	22.8732	22.556	22.7672	23.015
2008-03-18 04:46:00	12.8731	23.9569	22.7848	22.9794	22.8732	22.679	22.7672	22.944	22.8732	22.8732	22.9794	22.8732	22.8024	22.7672	22.8909	23.1217	-68.8033	-68.7197	-68.8033	-68.7615	-68.8033	-68.7615	-68.8033	-68.7615	-68.7615	-68.7615	-68.8033	-68.7615	-68.7615	-68.7615	-68.7615	-68.7615	-68.8033	-68.8033	-68.7615	-68.7615	-68.8033	-68.8033	-68.8033	22.8732	22.556	22.7672	23.0505
2008-03-18 04:46:20	12.8731	23.9569	22.7848	22.9794	22.8732	22.6614	22.7848	22.944	22.8732	22.8732	22.9794	22.8732	22.8024	22.7672	22.8909	23.1217	-68.7615	-68.7615	-68.7615	-68.7615	-68.7615	-68.8033	-68.7615	-68.8033	-68.7615	-68.8033	-68.8033	-68.7615	-68.8033	-68.8033	-68.7615	-68.7615	-68.7615	-68.8033	-68.7615	-68.7615	-68.7615	-68.7615	-68.8033	22.8732	22.556	22.7672	23.0327
2008-03-18 04:46:40	12.8731	23.9569	22.8024	22.9794	22.8732	22.679	22.8024	22.944	22.8732	22.8732	22.9794	22.8732	22.8024	22.7495	22.9086	23.1217	-68.7197	-68.7615	-68.7615	-68.8033	-68.8033	-68.7615	-68.7615	-68.8033	-68.7615	-68.7615	-68.7615	-68.7615	-68.7615	-68.7615	-68.8033	-68.7615	-68.8033	-68.7615	-68.8033	-68.7615	-68.7615	-68.8033	-68.7615	22.8732	22.556	22.7672	23.0505
2008-03-18 04:47:00	12.8731	23.9569	22.8024	22.9794	22.8732	22.6614	22.8024	22.944	22.8732	22.8732	22.9794	22.8732	22.8024	22.7672	22.9086	23.1395	-68.7615	-68.8033	-68.7615	-68.8033	-68.7615	-68.7615	-68.7615	-68.7615	-68.7615	-68.8033	-68.7615	-68.7615	-68.8033	-68.7615	-68.8033	-68.7615	-68.8033	-68.7615	-68.8033	-68.7615	-68.7615	-68.7615	-68.7615	22.8732	22.556	22.7672	23.0505
2008-03-18 04:47:20	12.8786	23.9862	22.8024	22.9794	22.8909	22.679	22.8024	22.944	22.8732	22.8732	22.9794	22.8732	22.8024	22.7672	22.9086	23.1573	-68.7615	-68.7615	-68.8033	-68.7615	-68.7615	-68.8033	-68.7615	-68.7615	-68.7615	-68.8033	-68.7615	-68.7615	-68.7615	-68.8033	-68.7615	-68.7615	-68.7615	-68.7615	-68.7615	-68.8033	-68.7615	-68.8033	-68.7615	22.8732	22.556	22.7848	23.0505
2008-03-18 04:47:40	12.8786	23.9862	22.8024	22.9794	22.8909	22.6967	22.8024	22.944	22.8732	22.8732	22.9794	22.8732	22.8024	22.7672	22.9086	23.1573	-68.8033	-68.7615	-68.7615	-68.7615	-68.7615	-68.8033	-68.7615	-68.7615	-68.7615	-68.7615	-68.7615	-68.8033	-68.7615	-68.8033	-68.8033	-68.8033	-68.7615	-68.8033	-68.7615	-68.7615	-68.8033	-68.7615	-68.7615	22.8732	22.556	22.8024	23.0505
2008-03-18 04:48:00	12.8731	23.9862	22.8024	22.9794	22.8909	22.6967	22.8024	22.944	22.8732	22.8732	22.9972	22.8732	22.8024	22.7672	22.9086	23.1573	-68.8033	-68.7615	-68.7615	-68.8033	-68.7615	-68.7615	-68.8033	-68.7615	-68.7615	-68.8033	-68.7615	-68.7615	-68.7615	-68.7615	-68.7615	-68.7615	-68.7615	-68.7615	-68.7615	-68.8033	-68.7615	-68.7615	-68.7615	22.8732	22.556	22.8024	23.0505
2008-03-18 04:48:20	12.8731	23.9862	22.8024	22.9794	22.8909	22.6967	22.8024	22.944	22.8732	22.8732	22.9972	22.8732	22.8024	22.7672	22.9086	23.1573	-68.7615	-68.7615	-68.7615	-68.7615	-68.7615	-68.7615	-68.8033	-68.8033	-68.7615	-68.7615	-68.8033	-68.7615	-68.8033	-68.7615	-68.7615	-68.7615	-68.8033	-68.7615	-68.7615	-68.7615	-68.8033	-68.7615	-68.8033	22.8732	22.556	22.8024	23.0505
2008-03-18 04:48:40	12.8731	23.9862	22.8024	22.9972	22.9086	22.6967	22.8024	22.944	22.8732	22.8732	23.015	22.8732	22.8024	22.7672	22.9086	23.1573	-68.7615	-68.8033	-68.7615	-68.7615	-68.8033	-68.7615	-68.8033	-68.8033	-68.7615	-68.8033	-68.8033	-68.7615	-68.7615	-68.7615	-68.8033	-68.7615	-68.7615	-68.7615	-68.7615	-68.7615	-68.7615	-68.7615	-68.8033	22.8732	22.556	22.8024	23.0505
2008-03-18 04:49:00	12.8677	23.9862	22.8024	22.9794	22.9086	22.6967	22.8024	22.944	22.8732	22.8732	23.015	22.8732	22.8024	22.7672	22.9086	23.1573	-68.7615	-68.7615	-68.7615	-68.8033	-68.7615	-68.7615	-68.8033	-68.7615	-68.7615	-68.8033	-68.7615	-68.7615	-68.7615	-68.7615	-68.7615	-68.7615	-68.8033	-68.7615	-68.8033	-68.7615	-68.7615	-68.7615	-68.7615	22.8732	22.556	22.8024	23.0505
2008-03-18 04:49:20	12.8731	23.9862	22.8024	22.9972	22.9086	22.6967	22.8024	22.944	22.8732	22.8732	23.015	22.8909	22.8024	22.7672	22.9086	23.1573	-68.7197	-68.7615	-68.7615	-68.7615	-68.7615	-68.8033	-68.8033	-68.7615	-68.8033	-68.7615	-68.7615	-68.7615	-68.8033	-68.7615	-68.7615	-68.7615	-68.8033	-68.7615	-68.7615	-68.7615	-68.7615	-68.8033	-68.7615	22.8732	22.556	22.8024	23.0505
2008-03-18 04:49:40	12.8786	23.9862	22.8024	23.015	22.9086	22.6967	22.8024	22.944	22.8732	22.8732	23.015	22.9086	22.8024	22.7672	22.9263	23.1573	-68.7615	-68.8033	-68.7615	-68.8033	-68.7615	-68.7615	-68.8033	-68.7615	-68.7615	-68.8033	-68.7615	-68.7615	-68.7615	-68.7615	-68.7615	-68.7615	-68.7615	-68.7615	-68.8033	-68.7615	-68.8033	-68.7615	-68.7615	22.9086	22.5736	22.8024	23.0683
2008-03-18 04:50:00	12.8731	24.0133	22.8024	22.9972	22.9086	22.6967	22.8024	22.944	22.8732	22.8909	23.015	22.9086	22.8201	22.7672	22.9263	23.1573	-68.7615	-68.8033	-68.7615	-68.7615	-68.8033	-68.7615	-68.8033	-68.8033	-68.7615	-68.7615	-68.8033	-68.7615	-68.7615	-68.8033	-68.7615	-68.7615	-68.7615	-68.7615	-68.8033	-68.8033	-68.7615	-68.7615	-68.7615	22.9086	22.556	22.8024	23.0861
2008-03-18 04:50:20	12.8731	24.0133	22.8024	23.015	22.9086	22.6967	22.8024	22.944	22.8732	22.8909	23.015	22.9086	22.8201	22.7672	22.944	23.1573	-68.7615	-68.7615	-68.7615	-68.7615	-68.7615	-68.7615	-68.7615	-68.7615	-68.7615	-68.8033	-68.7615	-68.7615	-68.7615	-68.7615	-68.7615	-68.7615	-68.7615	-68.7615	-68.7615	-68.7615	-68.7615	-68.8033	-68.7615	22.9086	22.5736	22.8024	23.0505
2008-03-18 04:50:40	12.8731	24.0133	22.8024	23.015	22.9086	22.6967	22.8024	22.944	22.8732	22.8909	23.015	22.9086	22.8024	22.7848	22.944	23.1573	-68.7615	-68.7615	-68.7615	-68.8033	-68.8033	-68.8033	-68.7615	-68.7615	-68.7615	-68.8033	-68.7615	-68.7615	-68.7615	-68.7615	-68.8033	-68.7615	-68.7615	-68.8033	-68.7615	-68.7615	-68.7615	-68.8033	-68.8033	22.9086	22.5911	22.8024	23.0683
2008-03-18 04:51:00	12.8786	24.0133	22.8024	23.015	22.9086	22.6967	22.8024	22.944	22.8732	22.9086	23.015	22.9086	22.8201	22.7848	22.944	23.1573	-68.7615	-68.8033	-68.7615	-68.8033	-68.7615	-68.7615	-68.8033	-68.8033	-68.7615	-68.8033	-68.8033	-68.7615	-68.7615	-68.7615	-68.7615	-68.7615	-68.7615	-68.7615	-68.7615	-68.7615	-68.7615	-68.7615	-68.7615	22.9086	22.5911	22.8024	23.0861
2008-03-18 04:51:20	12.8731	24.0427	22.8024	23.015	22.9086	22.7143	22.8024	22.944	22.8732	22.9086	23.015	22.9086	22.8024	22.7848	22.944	23.1573	-68.7615	-68.7615	-68.8033	-68.7615	-68.8033	-68.8033	-68.7615	-68.8033	-68.7615	-68.7615	-68.7615	-68.8033	-68.7615	-68.7615	-68.7615	-68.8033	-68.7615	-68.7615	-68.7615	-68.7615	-68.8033	-68.7615	-68.8033	22.9086	22.5911	22.8024	23.0683
2008-03-18 04:51:40	12.8731	24.0427	22.8024	23.015	22.9086	22.7143	22.8024	22.944	22.8732	22.9086	23.015	22.9086	22.8024	22.7848	22.944	23.1573	-68.7615	-68.8033	-68.7615	-68.7615	-68.7615	-68.7615	-68.7615	-68.7615	-68.7615	-68.7615	-68.7615	-68.7615	-68.8033	-68.7197	-68.7615	-68.8033	-68.8033	-68.7615	-68.7615	-68.7615	-68.7615	-68.7615	-68.8033	22.9086	22.5911	22.8024	23.0861
2008-03-18 04:52:00	12.8731	24.0427	22.8201	23.015	22.9086	22.7143	22.8024	22.9617	22.8732	22.9086	23.015	22.9086	22.8201	22.7848	22.944	23.1573	8.03875	7.97474	8.01311	8.05156	8.00029	8.03875	8.00029	8.01311	8.03875	8.03875	8.07716	8.06435	8.01311	8.01311	7.97474	7.94912	8.01311	-68.678	-68.7615	-68.7615	-68.7615	-68.7615	-68.7615	22.9086	22.5911	22.8024	23.0861
2008-03-18 04:52:20	12.8677	24.0427	22.8024	23.015	22.9086	22.7143	22.8201	22.944	22.8732	22.9086	23.015	22.9086	22.8201	22.8024	22.944	23.1751	8.03875	7.9875	8.02591	8.05156	8.00029	8.03875	8.00029	8.00029	8.03875	8.03875	8.06435	8.05156	8.01311	8.00029	7.97474	7.96197	8.01311	8.01311	8.01311	8.00029	7.92355	8.03875	7.94912	22.9086	22.5911	22.8024	23.0861
2008-03-18 04:52:40	12.8731	24.0427	22.8201	23.015	22.9086	22.7143	22.8024	22.9794	22.9086	22.9086	23.015	22.9086	22.8201	22.8024	22.944	23.193	8.03875	7.9875	8.02591	8.06435	8.00029	8.03875	8.00029	8.01311	8.03875	8.03875	8.06435	8.05156	8.00029	8.00029	7.97474	7.94912	8.01311	8.01311	8.01311	7.9875	7.92355	8.01311	7.93633	22.9086	22.5911	22.8024	23.0861
2008-03-18 04:53:00	12.8731	24.0427	22.8201	23.015	22.9263	22.7319	22.8378	22.944	22.9086	22.9086	23.015	22.9086	22.8201	22.8024	22.944	23.193	8.02591	7.9875	8.02591	8.05156	8.00029	8.03875	8.00029	8.01311	8.02591	8.03875	8.07716	8.05156	8.01311	8.03875	8.06435	8.167	8.20551	8.12846	8.06435	8.01311	7.9875	8.11563	8.00029	22.9086	22.5911	22.8024	23.0861
2008-03-18 04:53:20	12.8731	24.0427	22.8201	23.015	22.9086	22.7319	22.8378	22.944	22.9086	22.9086	23.015	22.9263	22.8378	22.8024	22.944	23.193	8.03875	7.9875	8.02591	8.06435	8.00029	8.03875	8.01311	8.00029	8.03875	8.02591	8.07716	8.06435	8.00029	8.01311	7.97474	7.94912	8.00029	8.00029	8.00029	7.97474	7.92355	8.02591	7.93633	22.9086	22.5911	22.8024	23.0861
2008-03-18 04:53:40	12.8731	24.0721	22.8201	23.015	22.9263	22.7143	22.8378	22.9794	22.9086	22.9086	23.015	22.944	22.8378	22.8024	22.944	23.2287	8.02591	7.9875	8.02591	8.05156	8.00029	8.02591	8.00029	8.01311	8.02591	8.02591	8.06435	8.05156	8.00029	8.00029	7.97474	7.93633	8.00029	8.00029	8.00029	7.9875	7.92355	8.01311	7.92355	22.944	22.5911	22.8378	23.0861
2008-03-18 04:54:00	12.8731	24.0721	22.8024	23.0327	22.9263	22.7319	22.8378	22.9794	22.9086	22.9086	23.015	22.944	22.8378	22.8024	22.944	23.2287	8.03875	7.96197	8.02591	8.03875	8.01311	8.03875	7.9875	8.01311	8.02591	8.02591	8.07716	8.03875	7.9875	8.00029	7.97474	7.94912	8.00029	7.9875	8.01311	7.97474	7.92355	8.01311	7.91075	22.944	22.5911	22.8378	23.0861
2008-03-18 04:54:20	12.8731	24.0721	22.8201	23.0505	22.944	22.7319	22.8555	22.9794	22.9086	22.9086	23.015	22.944	22.8378	22.8024	22.9617	23.2287	8.02591	7.97474	8.01311	8.03875	8.00029	8.02591	8.00029	8.00029	8.02591	8.02591	8.06435	8.05156	8.00029	7.9875	7.96197	7.93633	8.00029	7.9875	8.00029	7.97474	7.91075	8.01311	7.92355	22.944	22.5911	22.8378	23.0861
2008-03-18 04:54:40	12.8731	24.0721	22.8378	23.0505	22.944	22.7319	22.8732	22.9794	22.9263	22.9263	23.0327	22.944	22.8378	22.8024	22.9617	23.2287	8.01311	7.96197	8.01311	8.05156	8.00029	8.03875	8.00029	8.00029	8.03875	8.02591	8.05156	8.05156	7.9875	8.00029	7.9875	7.93633	7.9875	8.00029	8.00029	7.97474	7.89798	8.01311	7.92355	22.944	22.5911	22.8378	23.1039
2008-03-18 04:55:00	12.8731	24.1015	22.8378	23.0505	22.9263	22.7319	22.8555	22.9794	22.944	22.9263	23.0505	22.944	22.8378	22.8201	22.9794	23.2287	8.01311	7.96197	8.01311	8.03875	8.00029	8.02591	7.9875	7.9875	8.02591	8.02591	8.06435	8.03875	8.00029	8.00029	7.96197	7.93633	7.9875	8.00029	7.9875	7.97474	7.91075	8.01311	7.92355	22.944	22.5911	22.8378	23.0861
2008-03-18 04:55:20	12.8731	24.1015	22.8378	23.0505	22.944	22.7319	22.8732	22.9794	22.944	22.944	23.0505	22.944	22.8378	22.8024	22.9794	23.2287	8.01311	7.96197	8.01311	8.03875	7.9875	8.01311	7.9875	8.00029	8.02591	8.01311	8.05156	8.03875	7.97474	7.9875	7.96197	7.92355	7.9875	7.9875	8.00029	7.97474	7.89798	8.00029	7.91075	22.944	22.5911	22.8732	23.1217
2008-03-18 04:55:40	12.8731	24.1015	22.8378	23.0505	22.944	22.7319	22.8732	22.9794	22.944	22.944	23.0505	22.944	22.8378	22.8201	22.9794	23.2287	8.02591	7.96197	8.01311	8.03875	7.9875	8.02591	7.97474	8.00029	8.02591	8.02591	8.05156	8.03875	7.9875	7.9875	7.96197	7.92355	8.00029	8.00029	8.00029	7.97474	7.89798	8.01311	7.92355	22.944	22.5911	22.8732	23.1217
2008-03-18 04:56:00	12.8731	24.1308	22.8378	23.0861	22.944	22.7319	22.8732	22.9794	22.944	22.944	23.0505	22.944	22.8378	22.8201	22.9794	23.2287	8.01311	7.96197	8.01311	8.02591	7.97474	8.02591	7.9875	7.9875	8.02591	8.02591	8.05156	8.03875	7.9875	7.97474	7.94912	7.92355	7.9875	7.9875	7.9875	7.96197	7.89798	8.01311	7.91075	22.944	22.6087	22.8732	23.1217
2008-03-18 04:56:20	12.8731	24.1308	22.8378	23.0861	22.944	22.7319	22.8732	22.9972	22.944	22.944	23.0505	22.944	22.8555	22.8378	22.9794	23.2287	8.01311	7.96197	8.00029	8.02591	7.97474	8.02591	7.97474	7.97474	8.01311	8.02591	8.05156	8.02591	7.9875	7.97474	7.96197	7.93633	7.9875	7.9875	7.9875	7.96197	7.89798	8.00029	7.92355	22.944	22.5911	22.8732	23.1217
2008-03-18 04:56:40	12.8731	24.1602	22.8378	23.0861	-68.7197	22.7319	22.8732	23.015	22.944	22.944	23.0505	22.944	22.8378	22.8378	22.9794	23.2287	8.01311	7.96197	8.00029	8.03875	7.9875	8.01311	7.9875	7.9875	8.01311	8.01311	8.05156	8.02591	7.97474	7.9875	7.94912	7.92355	7.9875	7.9875	7.9875	7.96197	7.8852	8.00029	7.92355	22.944	22.6262	22.8732	23.1217
2008-03-18 04:57:00	12.8731	24.1602	22.8555	23.0861	-68.7615	22.7319	-68.7615	23.015	22.944	22.944	23.0505	22.9617	22.8555	22.8378	22.9794	23.2465	8.00029	7.96197	8.00029	8.02591	7.9875	8.01311	7.97474	7.9875	8.01311	8.01311	8.05156	8.02591	7.97474	7.97474	7.94912	7.92355	7.9875	7.9875	7.9875	7.97474	7.89798	8.00029	7.91075	22.944	22.6262	22.8732	23.1217
2008-03-18 04:57:20	12.8731	24.1602	22.8555	23.0861	-68.7615	22.7319	-68.7197	23.015	22.944	22.944	23.0505	22.9617	22.8555	22.8378	22.9972	23.2644	8.01311	7.94912	8.00029	8.02591	7.97474	8.01311	7.97474	7.9875	8.01311	8.01311	8.03875	8.02591	7.9875	7.97474	7.94912	7.92355	7.97474	7.9875	7.9875	7.96197	7.8852	8.00029	7.91075	22.944	22.6262	22.8732	23.1217
2008-03-18 04:57:40	12.8731	24.1602	22.8555	23.0861	-68.7615	22.7319	-68.7615	23.015	22.944	22.944	23.0505	22.9794	22.8732	22.8555	22.9972	23.2644	8.01311	7.94912	7.9875	8.03875	7.97474	8.01311	7.97474	7.97474	8.00029	8.01311	8.03875	8.03875	7.97474	7.97474	7.94912	7.92355	7.9875	7.9875	7.9875	7.96197	7.89798	8.00029	7.91075	22.944	22.6262	22.8732	23.1217
2008-03-18 04:58:00	12.8731	24.1896	22.8732	23.0861	-68.7615	22.7319	-68.7615	23.015	22.9617	22.944	23.0683	22.9617	22.8732	22.8378	23.015	23.2644	8.01311	7.96197	8.00029	8.02591	7.97474	8.01311	7.96197	7.9875	8.01311	8.01311	8.05156	8.02591	7.97474	7.97474	7.94912	7.91075	7.9875	7.97474	7.97474	7.96197	7.89798	8.00029	7.91075	22.944	22.6262	22.8732	23.1573
2008-03-18 04:58:20	12.8731	24.1896	22.8732	23.0861	-68.8033	22.7495	-68.7615	23.015	22.944	22.944	23.0683	22.9617	22.8732	22.8555	23.015	23.2644	8.01311	7.93633	8.00029	8.02591	7.97474	8.01311	7.96197	7.97474	8.01311	8.01311	8.03875	8.02591	7.97474	7.97474	7.93633	7.91075	7.9875	7.97474	7.97474	7.96197	7.8852	8.01311	7.91075	22.944	22.6262	22.8732	23.1573
2008-03-18 04:58:40	12.8731	24.2189	22.8732	23.0861	-68.7197	22.7319	-68.7197	23.015	22.9794	22.944	23.0505	22.9794	22.8732	22.8555	22.9972	23.2822	8.00029	7.94912	7.9875	8.01311	7.97474	8.01311	7.96197	7.97474	8.00029	8.01311	8.03875	8.02591	7.97474	7.9875	7.94912	7.91075	7.97474	7.97474	7.97474	7.96197	7.89798	8.00029	7.91075	22.944	22.6262	22.8732	23.1573
2008-03-18 04:59:00	12.8731	24.2189	22.8732	23.0861	22.944	22.7495	22.9086	23.015	22.9794	22.944	23.0861	22.9794	22.8732	22.8732	23.015	23.3001	8.01311	7.94912	8.00029	8.02591	7.96197	8.01311	7.97474	7.97474	8.00029	8.00029	8.03875	8.01311	7.97474	7.9875	7.93633	7.91075	7.97474	7.97474	7.9875	7.94912	7.87244	8.00029	7.91075	22.944	22.6262	22.8732	23.1573
2008-03-18 04:59:20	12.8731	24.2189	22.8732	23.0861	22.944	22.7495	22.9086	23.015	22.9794	22.944	23.0505	22.9794	22.8732	22.8732	23.015	23.3001	8.00029	7.94912	7.9875	8.02591	7.97474	8.00029	7.96197	7.96197	8.00029	8.00029	8.03875	8.02591	7.97474	7.97474	7.94912	7.91075	7.97474	7.97474	7.97474	7.94912	7.8852	7.9875	7.91075	22.944	22.6262	22.8909	23.1573
2008-03-18 04:59:40	12.8786	24.2189	22.8732	23.0861	22.944	22.7672	22.9086	23.015	22.9617	22.944	23.0683	22.9794	22.8732	22.8732	23.015	23.3001	8.00029	7.94912	7.9875	8.01311	7.96197	8.00029	7.96197	7.97474	8.00029	8.00029	8.03875	8.02591	7.97474	7.97474	7.93633	7.91075	7.97474	7.96197	7.97474	7.94912	7.8852	8.00029	7.89798	22.944	22.6262	22.8909	23.1573
2008-03-18 05:00:00	12.8731	24.2483	22.8732	23.1039	22.944	22.7495	22.9086	23.0327	22.9794	22.944	23.0683	22.9794	22.8732	22.8732	23.015	23.3001	7.9875	7.93633	7.9875	8.01311	7.96197	8.00029	7.96197	7.97474	8.01311	8.00029	8.03875	8.01311	7.96197	7.97474	7.93633	7.91075	7.96197	7.97474	7.97474	7.94912	7.87244	7.9875	7.89798	22.944	22.6262	22.8909	23.1573
2008-03-18 05:00:20	12.8731	24.2483	22.8732	23.0861	22.944	22.7495	22.9086	23.0505	22.9794	22.944	23.0683	22.9794	22.8732	22.8732	23.015	23.3001	8.00029	7.93633	7.9875	8.01311	7.96197	8.00029	7.96197	7.96197	8.00029	8.00029	8.03875	8.01311	7.96197	7.97474	7.93633	7.91075	7.96197	7.96197	7.9875	7.93633	7.85962	7.9875	7.89798	22.944	22.6262	22.8732	23.1573
2008-03-18 05:00:40	12.8731	24.2483	22.8732	23.1217	22.944	22.7672	22.9086	23.0505	22.9794	22.9617	23.0861	22.9794	22.8732	22.8732	23.015	23.3359	7.9875	7.93633	7.9875	8.01311	7.96197	8.00029	7.96197	7.96197	8.00029	7.9875	8.02591	8.01311	7.96197	7.97474	7.93633	7.91075	7.96197	7.97474	7.97474	7.94912	7.89798	7.97474	7.89798	22.944	22.6262	22.8732	23.193
2008-03-18 05:01:00	12.8786	24.2483	22.8732	23.1217	22.9617	22.7672	22.9263	23.0505	22.9794	22.944	23.0683	22.9794	22.8732	22.8732	23.015	23.3359	7.9875	7.93633	7.97474	8.01311	7.94912	7.9875	7.96197	7.96197	8.00029	8.00029	8.02591	8.02591	7.93633	7.97474	7.93633	7.89798	7.96197	7.94912	7.96197	7.92355	7.84688	8.00029	7.87244	22.9617	22.6262	22.9086	23.193
2008-03-18 05:01:20	12.8677	24.2483	22.8732	23.1217	22.944	22.7672	22.944	23.0505	22.9794	22.9617	23.0861	22.9794	22.8732	22.8732	23.015	23.3359	7.9875	7.94912	7.9875	8.03875	7.94912	7.97474	7.96197	7.96197	7.9875	8.00029	8.02591	8.00029	7.96197	7.96197	7.93633	7.89798	7.96197	7.96197	7.97474	7.93633	7.87244	7.9875	7.89798	22.944	22.6262	22.9086	23.193
2008-03-18 05:01:40	12.8731	24.2754	22.8732	23.1217	22.944	22.7672	22.9263	23.0505	22.9794	22.9794	23.0861	22.9794	22.8732	22.8732	23.015	23.3359	8.00029	7.93633	7.9875	8.00029	7.94912	8.00029	7.96197	7.96197	8.00029	7.9875	8.03875	8.01311	7.96197	7.94912	7.93633	7.89798	7.96197	7.96197	7.96197	7.93633	7.87244	7.9875	7.8852	22.944	22.6262	22.9086	23.193
2008-03-18 05:02:00	12.8731	24.2754	22.8909	23.1217	22.9617	22.7672	22.944	23.0505	22.9794	22.9794	23.0861	22.9794	22.8732	22.8732	23.015	23.3359	7.9875	7.93633	7.97474	8.01311	7.96197	7.9875	7.94912	7.96197	8.00029	7.9875	8.02591	8.01311	7.94912	7.96197	7.93633	7.89798	7.94912	7.96197	7.94912	7.93633	7.85962	7.9875	7.8852	22.944	22.6262	22.9086	23.193
2008-03-18 05:02:20	12.8731	24.2754	22.8909	23.1217	22.944	22.7672	22.944	23.0505	22.9794	22.9794	23.0683	22.9794	22.8909	22.8732	23.015	23.3359	7.9875	7.93633	7.9875	8.00029	7.94912	7.9875	7.94912	7.96197	7.9875	7.9875	8.02591	8.00029	7.94912	7.96197	7.92355	7.89798	7.96197	7.96197	7.96197	7.93633	7.87244	7.9875	7.8852	22.944	22.6262	22.9086	23.193
2008-03-18 05:02:40	12.8677	24.2754	22.9086	23.1217	22.944	22.7672	22.944	23.0505	22.9794	22.9794	23.0683	22.9972	22.8909	22.8909	23.015	23.3359	7.9875	7.93633	7.97474	8.01311	7.96197	7.9875	7.94912	7.96197	7.9875	7.9875	8.02591	8.00029	7.94912	7.96197	7.92355	7.89798	7.94912	7.96197	7.94912	7.93633	7.87244	7.97474	7.8852	22.944	22.6262	22.9086	23.193
2008-03-18 05:03:00	12.8731	24.3048	22.9086	23.1217	22.944	22.7672	22.944	23.0505	23.015	22.9794	23.0861	22.9794	22.8732	22.8732	23.015	23.3359	7.97474	7.93633	7.97474	8.00029	7.94912	7.9875	7.94912	7.94912	7.9875	7.9875	8.02591	8.00029	7.94912	7.94912	7.92355	7.89798	7.96197	7.96197	7.94912	7.93633	7.85962	7.97474	7.8852	22.944	22.6262	22.9086	23.193
2008-03-18 05:03:20	12.8731	24.3048	22.9086	23.1217	22.9617	22.7672	22.944	23.0505	22.9972	22.9794	23.0683	22.9972	22.8909	22.8909	23.015	23.3001	7.97474	7.93633	7.97474	8.00029	7.94912	7.9875	7.93633	7.96197	7.9875	7.97474	8.01311	8.00029	7.94912	7.96197	7.92355	7.89798	7.94912	7.94912	7.96197	7.93633	7.87244	7.97474	7.8852	22.944	22.6262	22.9086	23.193
2008-03-18 05:03:40	12.8731	24.3048	22.9086	23.1217	22.9794	22.7672	22.944	23.0505	23.015	22.9794	23.0861	22.9972	22.9086	22.8909	23.015	23.3001	7.9875	7.92355	7.97474	8.00029	7.94912	7.9875	7.93633	7.94912	7.9875	7.97474	8.01311	8.00029	7.94912	7.96197	7.91075	7.89798	7.94912	7.94912	7.94912	7.93633	7.87244	7.97474	7.8852	22.944	22.6262	22.9086	23.193
2008-03-18 05:04:00	12.8731	24.3048	22.9086	23.1217	22.944	22.7672	22.944	23.0683	23.015	22.9794	23.0861	23.015	22.9086	22.8909	23.015	23.3001	7.97474	7.91075	7.97474	7.9875	7.94912	7.97474	7.93633	7.94912	7.9875	7.9875	8.01311	8.00029	7.94912	7.94912	7.92355	7.8852	7.94912	7.96197	7.94912	7.93633	7.87244	7.96197	7.8852	22.944	22.6262	22.944	23.193
2008-03-18 05:04:20	12.8731	24.3342	22.9086	23.1217	22.9617	22.7672	22.944	23.0683	23.015	22.9794	23.0861	22.9972	22.9086	22.9086	23.015	23.318	7.96197	7.92355	7.97474	7.9875	7.94912	7.9875	7.93633	7.94912	7.9875	7.97474	8.01311	8.00029	7.94912	7.94912	7.91075	7.8852	7.94912	7.94912	7.94912	7.93633	7.85962	7.96197	7.8852	22.944	22.6262	22.944	23.193
2008-03-18 05:04:40	12.8731	24.3342	22.9086	23.1217	22.944	22.7672	22.944	23.0861	23.015	22.9794	23.0861	22.9972	22.9086	22.9086	23.015	23.3001	7.97474	7.92355	7.96197	8.00029	7.93633	7.97474	7.94912	7.96197	7.9875	7.97474	8.01311	8.00029	7.94912	7.94912	7.91075	7.8852	7.94912	7.93633	7.94912	7.93633	7.85962	7.96197	7.87244	22.944	22.6262	22.944	23.193
2008-03-18 05:05:00	12.8731	24.3342	22.9086	23.1395	22.9617	22.7672	22.944	23.0861	23.015	22.9794	23.0861	23.015	22.9086	22.9086	23.015	23.3001	7.97474	7.92355	7.96197	7.9875	7.93633	7.9875	7.93633	7.93633	7.97474	7.97474	8.01311	8.00029	7.94912	7.94912	7.91075	7.87244	7.94912	7.94912	7.96197	7.93633	7.85962	7.96197	7.87244	22.944	22.6262	22.944	23.193
2008-03-18 05:05:20	12.8731	24.3342	22.9086	23.1395	22.9794	22.7672	22.944	23.0861	23.015	22.9794	23.0861	23.015	22.9086	22.9086	23.015	23.318	7.97474	7.92355	7.96197	8.00029	7.93633	7.97474	7.93633	7.94912	7.97474	7.97474	8.01311	7.9875	7.93633	7.94912	7.91075	7.8852	7.94912	7.94912	7.94912	7.92355	7.85962	7.96197	7.87244	22.944	22.6262	22.944	23.193
2008-03-18 05:05:40	12.8731	24.3342	22.9086	23.1395	22.9794	22.7672	22.944	23.0683	23.015	22.9794	23.0861	23.015	22.9086	22.9086	23.015	23.318	7.97474	7.91075	7.96197	7.9875	7.93633	7.97474	7.93633	7.93633	7.97474	7.97474	8.00029	7.9875	7.93633	7.93633	7.91075	7.8852	7.93633	7.94912	7.93633	7.92355	7.84688	7.97474	7.87244	22.9617	22.6262	22.944	23.193
2008-03-18 05:06:00	12.8731	24.3342	22.9086	23.1573	22.9794	22.7848	22.944	23.0861	23.015	22.9972	23.0861	23.015	22.9086	22.9086	23.015	23.318	7.96197	7.92355	7.96197	7.9875	7.93633	7.97474	7.93633	7.94912	7.97474	7.97474	8.00029	7.9875	7.93633	7.93633	7.91075	7.87244	7.93633	7.93633	7.94912	7.92355	7.84688	7.96197	7.87244	22.9617	22.6262	22.944	23.193
2008-03-18 05:06:20	12.8731	24.3635	22.9263	23.1217	22.9794	22.7848	22.944	23.0861	23.015	22.9972	23.0861	23.015	22.9086	22.9086	23.015	23.318	7.96197	7.91075	7.96197	7.9875	7.93633	7.97474	7.92355	7.93633	7.97474	7.97474	8.01311	7.9875	7.94912	7.93633	7.91075	7.87244	7.94912	7.93633	7.94912	7.93633	7.84688	7.96197	7.87244	22.944	22.6262	22.944	23.193
2008-03-18 05:06:40	12.8731	24.3635	22.9086	23.1573	22.9794	22.8024	22.944	23.0861	23.015	22.9972	23.0861	23.015	22.9086	22.9086	23.015	23.318	7.96197	7.91075	7.96197	7.97474	7.93633	7.97474	7.92355	7.93633	7.97474	7.97474	8.01311	7.9875	7.93633	7.93633	7.91075	7.8852	7.93633	7.93633	7.93633	7.92355	7.84688	7.96197	7.87244	22.944	22.6262	22.944	23.193
2008-03-18 05:07:00	12.8731	24.3635	22.9263	23.1395	22.9794	22.8024	22.944	23.0861	23.015	22.9972	23.0861	23.015	22.9086	22.9086	23.0327	23.3359	7.97474	7.91075	7.96197	7.9875	7.93633	7.96197	7.92355	7.94912	7.96197	7.96197	8.01311	7.9875	7.93633	7.93633	7.91075	7.87244	7.93633	7.93633	7.93633	7.91075	7.83417	7.97474	7.87244	22.9617	22.6262	22.944	23.193
2008-03-18 05:07:20	12.8731	24.3635	22.9263	23.1573	22.9794	22.7848	22.944	23.0861	23.015	23.015	23.0861	23.015	22.9086	22.9086	23.0327	23.3359	7.96197	7.91075	7.94912	7.97474	7.92355	7.97474	7.93633	7.93633	7.97474	7.97474	7.9875	7.9875	7.93633	7.92355	7.91075	7.87244	7.93633	7.93633	7.94912	7.91075	7.84688	7.96197	7.85962	22.944	22.6262	22.944	23.193
2008-03-18 05:07:40	12.8731	24.3929	22.944	23.1573	22.9794	22.7848	22.944	23.0861	23.015	23.015	23.0861	23.015	22.9086	22.9086	23.0505	23.3359	7.96197	7.91075	7.94912	7.9875	7.92355	7.96197	7.93633	7.93633	7.96197	7.96197	8.00029	7.97474	7.93633	7.93633	7.91075	7.87244	7.93633	7.93633	7.93633	7.91075	7.84688	7.96197	7.85962	22.944	22.6262	22.944	23.193
2008-03-18 05:08:00	12.8731	24.3929	22.944	23.1573	22.9794	22.8024	22.944	23.0861	23.015	23.015	23.0861	23.015	22.9086	22.9086	23.0505	23.3717	7.96197	7.91075	7.94912	7.97474	7.92355	7.96197	7.92355	7.93633	7.96197	7.96197	8.00029	7.97474	7.92355	7.93633	7.89798	7.85962	7.93633	7.93633	7.93633	7.91075	7.84688	7.96197	7.85962	22.9794	22.6262	22.944	23.193
2008-03-18 05:08:20	12.8731	24.3929	22.944	23.1573	22.9794	22.8024	22.944	23.0861	23.015	23.015	23.0861	23.015	22.9086	22.9263	23.0505	23.3717	7.96197	7.89798	7.94912	7.97474	7.92355	7.96197	7.92355	7.93633	7.96197	7.96197	8.00029	7.9875	7.92355	7.93633	7.89798	7.87244	7.93633	7.93633	7.93633	7.91075	7.84688	7.96197	7.85962	22.9794	22.6262	22.944	23.2287
2008-03-18 05:08:40	12.8677	24.3929	22.944	23.1573	22.9794	22.8024	22.9617	23.0861	23.015	23.015	23.0861	23.015	22.9263	22.9263	23.0505	23.3717	7.94912	7.91075	7.93633	7.97474	7.91075	7.96197	7.92355	7.93633	7.96197	7.96197	7.9875	7.97474	7.92355	7.93633	7.89798	7.87244	7.92355	7.93633	7.92355	7.91075	7.83417	7.94912	7.85962	22.9794	22.6262	22.944	23.2287
2008-03-18 05:09:00	12.8731	24.3929	22.944	23.1573	22.9794	22.8024	22.9617	23.0861	23.0327	23.015	23.0861	23.015	22.9263	22.944	23.0505	23.3717	7.94912	7.89798	7.94912	7.97474	7.92355	7.96197	7.92355	7.92355	7.96197	7.96197	7.9875	7.97474	7.92355	7.92355	7.89798	7.85962	7.92355	7.92355	7.92355	7.91075	7.84688	7.94912	7.85962	22.9794	22.6262	22.944	23.2287
2008-03-18 05:09:20	12.8731	24.3929	22.944	23.1573	22.9794	22.8024	22.9794	23.0861	23.0327	23.015	23.0861	23.015	22.944	22.944	23.0505	23.3717	7.96197	7.89798	7.94912	7.97474	7.92355	7.96197	7.91075	7.92355	7.94912	7.94912	7.9875	7.97474	7.91075	7.92355	7.8852	7.85962	7.92355	7.92355	7.93633	7.91075	7.84688	7.94912	7.84688	22.9794	22.6262	22.944	23.2287
2008-03-18 05:09:40	12.8731	24.3929	22.944	23.1573	22.9794	22.8024	22.9794	23.0861	23.0327	23.015	23.0861	23.0505	22.944	22.944	23.0505	23.3717	7.94912	7.89798	7.94912	7.96197	7.92355	7.96197	7.91075	7.92355	7.96197	7.94912	8.00029	7.97474	7.91075	7.92355	7.89798	7.85962	7.92355	7.92355	7.92355	7.89798	7.83417	7.94912	7.85962	22.9794	22.6262	22.944	23.2287
2008-03-18 05:10:00	12.8677	24.3929	22.944	23.1573	22.9794	22.8024	22.9794	23.0861	23.0505	23.015	23.0861	23.0327	22.944	22.944	23.0505	23.3717	7.94912	7.89798	7.94912	7.96197	7.91075	7.94912	7.91075	7.92355	7.96197	7.94912	7.9875	7.97474	7.91075	7.92355	7.8852	7.87244	7.91075	7.92355	7.92355	7.89798	7.83417	7.93633	7.84688	22.9794	22.6262	22.944	23.2287
2008-03-18 05:10:20	12.8731	24.3929	22.944	23.1751	22.9794	22.8024	22.9794	23.1039	23.0327	23.015	23.0861	23.0505	22.944	22.944	23.0505	23.3717	7.94912	7.89798	7.93633	7.97474	7.91075	7.94912	7.91075	7.92355	7.96197	7.94912	7.9875	7.97474	7.92355	7.92355	7.89798	7.85962	7.91075	7.92355	7.92355	7.91075	7.83417	7.94912	7.84688	22.9794	22.6262	22.9263	23.2287
2008-03-18 05:10:40	12.8731	24.3929	22.944	23.1751	22.9794	22.8024	22.9972	23.0861	23.0505	23.015	23.0861	23.0505	22.944	22.944	23.0505	23.3717	7.94912	7.8852	7.93633	7.96197	7.91075	7.94912	7.91075	7.91075	7.94912	7.94912	7.9875	7.96197	7.92355	7.92355	7.8852	7.84688	7.92355	7.92355	7.92355	7.89798	7.83417	7.94912	7.84688	22.9794	22.6262	22.944	23.2465
2008-03-18 05:11:00	12.8731	24.4223	22.944	23.193	22.9794	22.8024	23.015	23.1039	23.0505	23.015	23.0861	23.0505	22.944	22.944	23.0505	23.3717	7.94912	7.8852	7.93633	7.96197	7.89798	7.93633	7.92355	7.92355	7.97474	7.94912	7.9875	7.96197	7.91075	7.91075	7.87244	7.84688	7.92355	7.92355	7.91075	7.91075	7.82133	7.93633	7.85962	22.9794	22.6262	22.944	23.2465
2008-03-18 05:11:20	12.8731	24.4223	22.944	23.193	22.9794	22.8024	23.015	23.1217	23.0505	23.015	23.0861	23.0505	22.944	22.944	23.0861	23.3717	7.93633	7.8852	7.93633	7.96197	7.91075	7.94912	7.91075	7.92355	7.96197	7.94912	7.97474	7.96197	7.91075	7.92355	7.8852	7.85962	7.92355	7.91075	7.91075	7.89798	7.83417	7.92355	7.84688	22.9794	22.6262	22.944	23.2287
2008-03-18 05:11:40	12.8677	24.4223	22.944	23.193	22.9794	22.8024	23.015	23.1039	23.0505	23.015	23.0861	23.0505	22.944	22.944	23.0861	23.3717	7.94912	7.8852	7.92355	7.96197	7.91075	7.94912	7.91075	7.92355	7.94912	7.94912	7.97474	7.97474	7.89798	7.89798	7.87244	7.85962	7.91075	7.91075	7.91075	7.8852	7.83417	7.93633	7.84688	22.9794	22.6438	22.944	23.2644
2008-03-18 05:12:00	12.8677	24.4223	22.944	23.193	22.9972	22.8024	23.015	23.1039	23.0505	23.015	23.0861	23.0505	22.944	22.944	23.0861	23.3717	7.94912	7.8852	7.93633	7.96197	7.91075	7.94912	7.89798	7.91075	7.94912	7.93633	7.97474	7.96197	7.91075	7.91075	7.87244	7.84688	7.91075	7.91075	7.91075	7.8852	7.82133	7.93633	7.84688	22.9794	22.6438	22.944	23.2644
2008-03-18 05:12:20	12.8731	24.4223	22.944	23.193	22.9972	22.8024	23.015	23.1217	23.0505	23.015	23.1039	23.0505	22.944	22.944	23.0861	23.3896	7.93633	7.8852	7.93633	7.94912	7.91075	7.93633	7.89798	7.91075	7.94912	7.94912	7.97474	7.96197	7.91075	7.91075	7.87244	7.84688	7.91075	7.91075	7.91075	7.8852	7.82133	7.93633	7.84688	22.9794	22.6614	22.944	23.2644
2008-03-18 05:12:40	12.8731	24.4223	22.944	23.193	23.015	22.8024	23.015	23.1217	23.0505	23.015	23.0861	23.0505	22.944	22.9794	23.0861	23.3717	7.93633	7.8852	7.92355	7.96197	7.91075	7.94912	7.89798	7.91075	7.93633	7.93633	7.9875	7.94912	7.91075	7.91075	7.87244	7.84688	7.91075	7.91075	7.91075	7.8852	7.82133	7.92355	7.83417	22.9794	22.6614	22.944	23.2644
2008-03-18 05:13:00	12.8731	24.4223	22.944	23.193	22.9972	22.8024	23.015	23.1217	23.0683	23.015	23.1039	23.0683	22.944	22.9794	23.0861	23.3896	7.93633	7.8852	7.92355	7.96197	7.89798	7.93633	7.89798	7.91075	7.94912	7.93633	7.97474	7.94912	7.91075	7.91075	7.87244	7.84688	7.91075	7.91075	7.91075	7.8852	7.82133	7.92355	7.83417	22.9794	22.6614	22.944	23.2644
2008-03-18 05:13:20	12.8731	24.4516	22.9617	23.193	23.015	22.8201	23.015	23.1217	23.0683	23.015	23.1039	23.0683	22.944	22.9794	23.0861	23.4076	7.92355	7.8852	7.92355	7.94912	7.89798	7.93633	7.89798	7.91075	7.93633	7.93633	7.97474	7.94912	7.89798	7.89798	7.87244	7.83417	7.91075	7.91075	7.91075	7.8852	7.82133	7.92355	7.83417	22.9794	22.6614	22.944	23.3001
2008-03-18 05:13:40	12.8677	24.4516	22.944	23.193	23.015	22.8201	23.0327	23.1217	23.0861	23.015	23.1039	23.0683	22.944	22.9794	23.0861	23.4076	7.93633	7.8852	7.93633	7.94912	7.89798	7.93633	7.89798	7.91075	7.93633	7.93633	7.97474	7.94912	7.89798	7.89798	7.87244	7.84688	7.91075	7.89798	7.91075	7.8852	7.80859	7.92355	7.83417	23.015	22.6614	22.944	23.3001
2008-03-18 05:14:00	12.8731	24.4516	22.9617	23.2108	23.015	22.8201	23.0505	23.1217	23.0861	23.0327	23.1039	23.0861	22.944	22.9794	23.0861	23.4076	7.93633	7.8852	7.92355	7.94912	7.89798	7.93633	7.89798	7.91075	7.92355	7.92355	7.97474	7.94912	7.89798	7.91075	7.87244	7.83417	7.89798	7.91075	7.91075	7.8852	7.80859	7.92355	7.83417	23.015	22.6614	22.944	23.3001
2008-03-18 05:14:20	12.8786	24.4516	22.9617	23.193	23.015	22.8378	23.0505	23.1395	23.0861	23.0327	23.1217	23.0861	22.944	22.9972	23.0861	23.4256	7.93633	7.8852	7.91075	7.94912	7.89798	7.93633	7.89798	7.91075	7.93633	7.93633	7.96197	7.94912	7.89798	7.89798	7.87244	7.83417	7.89798	7.89798	7.89798	7.8852	7.80859	7.92355	7.83417	23.015	22.6614	22.9794	23.3001
2008-03-18 05:14:40	12.8731	24.4516	22.9617	23.2108	23.015	22.8378	23.0505	23.1395	23.0861	23.0505	23.1217	23.0861	22.9617	22.9972	23.0861	23.4256	7.92355	7.87244	7.91075	7.93633	7.89798	7.93633	7.89798	7.89798	7.93633	7.93633	7.96197	7.96197	7.89798	7.89798	7.87244	7.83417	7.89798	7.91075	7.89798	7.8852	7.82133	7.92355	7.83417	23.015	22.6614	22.9794	23.3001
2008-03-18 05:15:00	12.8731	24.4516	22.9794	23.2108	23.015	22.8201	23.0505	23.1573	23.0861	23.0327	23.1217	23.0861	22.944	23.015	23.0861	23.4076	7.92355	7.87244	7.91075	7.94912	7.89798	7.92355	7.89798	7.91075	7.93633	7.92355	7.96197	7.96197	7.89798	7.89798	7.85962	7.83417	7.89798	7.91075	7.89798	7.87244	7.80859	7.91075	7.82133	23.015	22.6614	22.9794	23.3001
2008-03-18 05:15:20	12.8731	24.4516	22.9794	23.2108	23.015	22.8378	23.0505	23.1573	23.0861	23.0505	23.1217	23.0861	22.944	23.015	23.0861	23.4076	7.92355	7.87244	7.91075	7.94912	7.89798	7.93633	7.8852	7.89798	7.92355	7.93633	7.96197	7.94912	7.8852	7.89798	7.85962	7.84688	7.89798	7.91075	7.8852	7.87244	7.80859	7.91075	7.82133	23.015	22.6614	22.9794	23.3001
2008-03-18 05:15:40	12.8731	24.4516	22.9794	23.2108	23.015	22.8378	23.0505	23.1573	23.0861	23.0505	23.1217	23.0861	22.944	23.015	23.0861	23.4076	7.93633	7.87244	7.92355	7.94912	7.8852	7.92355	7.87244	7.89798	7.93633	7.92355	7.96197	7.94912	7.89798	7.89798	7.85962	7.83417	7.89798	7.89798	7.89798	7.87244	7.80859	7.91075	7.82133	23.015	22.6614	22.9794	23.3001
2008-03-18 05:16:00	12.8731	24.481	22.9794	23.2287	23.015	22.8378	23.0505	23.1573	23.0861	23.0505	23.1217	23.0861	22.944	23.015	23.0861	23.4256	7.92355	7.87244	7.91075	7.94912	7.89798	7.92355	7.89798	7.89798	7.92355	7.92355	7.94912	7.93633	7.89798	7.89798	7.85962	7.83417	7.89798	7.8852	7.89798	7.87244	7.80859	7.91075	7.82133	23.015	22.6614	23.015	23.3001
2008-03-18 05:16:20	12.8786	24.481	22.9794	23.2287	23.015	22.8378	23.0505	23.1573	23.0861	23.0505	23.1217	23.0861	22.9617	23.015	23.0861	23.4076	7.92355	7.87244	7.91075	7.94912	7.8852	7.91075	7.8852	7.89798	7.92355	7.92355	7.96197	7.94912	7.8852	7.8852	7.85962	7.83417	7.89798	7.8852	7.89798	7.8852	7.80859	7.91075	7.82133	23.015	22.6614	23.015	23.3001
2008-03-18 05:16:40	12.8731	24.481	22.9794	23.2287	23.015	22.8378	23.0505	23.1573	23.0861	23.0505	23.1217	23.0861	22.9794	23.015	23.0861	23.4076	7.92355	7.85962	7.91075	7.94912	7.89798	7.92355	7.87244	7.8852	7.92355	7.92355	7.96197	7.93633	7.8852	7.89798	7.85962	7.83417	7.8852	7.89798	7.89798	7.87244	7.79578	7.91075	7.82133	23.015	22.6614	23.015	23.3001
2008-03-18 05:17:00	12.8731	24.481	22.9794	23.2287	23.015	22.8378	23.0505	23.1573	23.0861	23.0505	23.1217	23.0861	22.9794	23.015	23.0861	23.4076	7.92355	7.87244	7.91075	7.93633	7.8852	7.92355	7.8852	7.89798	7.92355	7.91075	7.96197	7.94912	7.8852	7.89798	7.84688	7.82133	7.89798	7.8852	7.8852	7.87244	7.80859	7.91075	7.80859	23.015	22.6614	23.015	23.3001
2008-03-18 05:17:20	12.8731	24.481	22.9794	23.2287	23.015	22.8378	23.0505	23.1573	23.0861	23.0505	23.1395	23.0861	22.9794	23.015	23.0861	23.4076	7.91075	7.87244	7.91075	7.93633	7.8852	7.92355	7.8852	7.89798	7.92355	7.91075	7.96197	7.93633	7.8852	7.8852	7.85962	7.82133	7.8852	7.8852	7.8852	7.87244	7.79578	7.91075	7.80859	23.015	22.6614	23.015	23.3001
2008-03-18 05:17:40	12.8731	24.481	22.9794	23.2287	23.015	22.8378	23.0505	23.1573	23.0861	23.0505	23.1217	23.0861	22.9794	23.015	23.0861	23.4076	7.91075	7.85962	7.89798	7.93633	7.8852	7.91075	7.8852	7.8852	7.91075	7.92355	7.94912	7.93633	7.89798	7.89798	7.84688	7.82133	7.8852	7.8852	7.8852	7.87244	7.80859	7.91075	7.82133	23.015	22.6614	23.015	23.3001
2008-03-18 05:18:00	12.8731	24.481	22.9794	23.2287	23.015	22.8378	23.0505	23.1573	23.0861	23.0505	23.1395	23.0861	22.9794	23.015	23.0861	23.4076	7.91075	7.85962	7.89798	7.93633	7.8852	7.91075	7.8852	7.8852	7.91075	7.92355	7.96197	7.93633	7.8852	7.8852	7.85962	7.82133	7.8852	7.8852	7.8852	7.87244	7.79578	7.91075	7.80859	23.015	22.6614	23.015	23.3001
2008-03-18 05:18:20	12.8731	24.5104	22.9794	23.2287	23.015	22.8378	23.0505	23.1573	23.0861	23.0505	23.1573	23.0861	22.9794	23.015	23.0861	23.4076	7.91075	7.85962	7.91075	7.92355	7.87244	7.92355	7.87244	7.89798	7.92355	7.92355	7.94912	7.93633	7.8852	7.8852	7.84688	7.83417	7.8852	7.8852	7.8852	7.85962	7.79578	7.91075	7.80859	23.015	22.6614	23.015	23.3001
2008-03-18 05:18:40	12.8731	24.5104	22.9972	23.2287	23.015	22.8555	23.0505	23.1573	23.0861	23.0505	23.1573	23.0861	22.9794	23.015	23.0861	23.4076	7.91075	7.85962	7.89798	7.93633	7.87244	7.91075	7.8852	7.8852	7.91075	7.91075	7.93633	7.93633	7.87244	7.8852	7.84688	7.82133	7.8852	7.8852	7.8852	7.85962	7.79578	7.91075	7.80859	23.015	22.679	23.015	23.3001
2008-03-18 05:19:00	12.8731	24.5104	22.9972	23.2287	23.015	22.8378	23.0505	23.1573	23.0861	23.0505	23.1573	23.0861	22.9794	23.015	23.1039	23.4076	7.91075	7.85962	7.89798	7.92355	7.87244	7.91075	7.8852	7.8852	7.92355	7.91075	7.94912	7.92355	7.87244	7.8852	7.84688	7.82133	7.87244	7.8852	7.8852	7.87244	7.79578	7.91075	7.80859	23.015	22.6614	23.015	23.3001
2008-03-18 05:19:20	12.8731	24.5104	23.015	23.2287	23.015	22.8378	23.0505	23.1573	23.1039	23.0683	23.1573	23.0861	22.9794	23.015	23.0861	23.4076	7.91075	7.85962	7.89798	7.93633	7.8852	7.92355	7.87244	7.8852	7.92355	7.91075	7.94912	7.92355	7.8852	7.8852	7.84688	7.82133	7.87244	7.8852	7.8852	7.85962	7.79578	7.91075	7.80859	23.0327	22.6614	23.015	23.3001
2008-03-18 05:19:40	12.8731	24.5104	22.9972	23.2287	23.015	22.8555	23.0505	23.1573	23.0861	23.0505	23.1573	23.0861	22.9972	23.015	23.0861	23.4076	7.89798	7.85962	7.89798	7.93633	7.87244	7.91075	7.8852	7.8852	7.91075	7.91075	7.94912	7.93633	7.87244	7.8852	7.84688	7.82133	7.8852	7.8852	7.8852	7.85962	7.79578	7.89798	7.80859	23.0327	22.679	23.015	23.3001
2008-03-18 05:20:00	12.8731	24.5104	23.015	23.2287	23.015	22.8732	23.0505	23.1573	23.1039	23.0683	23.1573	23.0861	22.9972	23.015	23.0861	23.4076	7.91075	7.85962	7.89798	7.93633	7.8852	7.91075	7.87244	7.8852	7.91075	7.91075	7.93633	7.92355	7.8852	7.87244	7.84688	7.82133	7.8852	7.87244	7.8852	7.85962	7.79578	7.89798	7.80859	23.015	22.6614	23.015	23.3001
2008-03-18 05:20:20	12.8731	24.5104	23.015	23.2287	23.015	22.8732	23.0505	23.1573	23.0861	23.0861	23.1573	23.0861	22.9972	23.015	23.1039	23.4076	7.91075	7.85962	7.89798	7.92355	7.8852	7.91075	7.87244	7.8852	7.91075	7.91075	7.94912	7.92355	7.87244	7.87244	7.83417	7.82133	7.8852	7.8852	7.8852	7.85962	7.79578	7.91075	7.80859	23.015	22.6614	23.015	23.2822
2008-03-18 05:20:40	12.8731	24.5104	23.015	23.2287	23.015	22.8555	23.0683	23.1573	23.0861	23.0861	23.1573	23.0861	22.9972	23.015	23.1039	23.4076	7.89798	7.84688	7.8852	7.92355	7.87244	7.91075	7.87244	7.8852	7.91075	7.91075	7.94912	7.92355	7.8852	7.8852	7.83417	7.80859	7.87244	7.87244	7.87244	7.85962	7.78301	7.89798	7.80859	23.0327	22.6614	23.015	23.3001
2008-03-18 05:21:00	12.8731	24.5398	23.015	23.2287	23.0327	22.8555	23.0683	23.1573	23.1039	23.0683	23.1573	23.1039	22.9972	23.015	23.0861	23.4076	7.91075	7.84688	7.8852	7.92355	7.87244	7.91075	7.87244	7.8852	7.91075	7.91075	7.93633	7.92355	7.8852	7.87244	7.84688	7.82133	7.8852	7.8852	7.8852	7.84688	7.78301	7.89798	7.80859	23.0327	22.6614	23.015	23.3001
2008-03-18 05:21:20	12.8731	24.5398	23.015	23.2287	23.015	22.8732	23.0683	23.1573	23.1039	23.0861	23.1573	23.1039	23.015	23.015	23.1039	23.4076	7.89798	7.84688	7.8852	7.92355	7.8852	7.91075	7.87244	7.87244	7.91075	7.91075	7.93633	7.92355	7.8852	7.85962	7.84688	7.82133	7.87244	7.87244	7.87244	7.85962	7.78301	7.89798	7.79578	23.015	22.6614	23.015	23.3001
2008-03-18 05:21:40	12.8731	24.5398	23.015	23.2287	23.0505	22.8732	23.0683	23.1573	23.1039	23.0861	23.1573	23.1039	23.015	23.015	23.0861	23.4076	7.89798	7.84688	7.89798	7.92355	7.85962	7.91075	7.85962	7.83417	7.91075	7.89798	7.94912	7.92355	7.87244	7.87244	7.84688	7.80859	7.87244	7.8852	7.87244	7.85962	7.78301	7.89798	7.80859	23.015	22.6614	23.015	23.3001
2008-03-18 05:22:00	12.8786	24.5398	23.015	23.2287	23.0505	22.8732	23.0683	23.1751	23.1217	23.0861	23.1573	23.1039	23.015	23.015	23.1039	23.4256	7.89798	7.84688	7.89798	7.92355	7.87244	7.91075	7.85962	7.87244	7.91075	7.89798	7.93633	7.92355	7.87244	7.85962	7.84688	7.82133	7.87244	7.87244	7.87244	7.84688	7.78301	7.89798	7.80859	23.0327	22.6614	23.015	23.3001
2008-03-18 05:22:20	12.8731	24.5398	23.015	23.2287	23.0505	22.8732	23.0505	23.1573	23.1217	23.0861	23.1573	23.1039	23.015	23.015	23.1039	23.4076	7.8852	7.84688	7.89798	7.92355	7.85962	7.91075	7.85962	7.87244	7.89798	7.91075	7.93633	7.92355	7.85962	7.87244	7.84688	7.80859	7.87244	7.87244	7.87244	7.84688	7.78301	7.8852	7.80859	23.0505	22.6614	23.015	23.3001
2008-03-18 05:22:40	12.8731	24.5398	23.015	23.2287	23.0505	22.8732	23.0683	23.1751	23.1039	23.0861	23.1573	23.1039	23.015	23.015	23.1039	23.4076	7.8852	7.84688	7.8852	7.92355	7.89798	7.89798	7.85962	7.85962	7.89798	7.89798	7.93633	7.91075	7.87244	7.87244	7.83417	7.80859	7.87244	7.87244	7.87244	7.84688	7.78301	7.89798	7.79578	23.0327	22.6614	23.015	23.3001
2008-03-18 05:23:00	12.8731	24.5691	23.015	23.2287	22.9794	22.8732	23.0505	23.1573	23.0683	23.0861	23.1395	23.0861	22.9794	23.015	23.0861	23.4076	7.91075	7.84688	7.8852	7.92355	7.85962	7.91075	7.85962	7.87244	7.91075	7.89798	7.93633	7.92355	7.87244	7.85962	7.83417	7.82133	7.85962	7.87244	7.87244	7.84688	7.78301	7.8852	7.79578	23.015	22.6262	22.9972	23.2644
2008-03-18 05:23:20	12.8731	24.5691	23.015	23.193	22.9794	22.8732	23.0505	23.1573	23.0861	23.0861	23.1395	23.0861	22.9794	22.9794	23.0861	23.3717	7.89798	7.83417	7.8852	7.92355	7.85962	7.89798	7.85962	7.87244	7.89798	7.89798	7.92355	7.92355	7.85962	7.87244	7.83417	7.80859	7.87244	7.87244	7.87244	7.84688	7.78301	7.8852	7.79578	22.9972	22.6262	22.9617	23.2287
2008-03-18 05:23:40	12.8731	24.5691	23.015	23.193	22.9794	22.8732	23.0327	23.1395	23.0861	23.0683	23.1217	23.0861	22.9617	22.944	23.0683	23.3001	7.89798	7.83417	7.8852	7.91075	7.85962	7.89798	7.85962	7.85962	7.89798	7.89798	7.93633	7.91075	7.85962	7.85962	7.84688	7.80859	7.87244	7.85962	7.87244	7.84688	7.78301	7.8852	7.79578	22.9794	22.5911	22.9086	23.193
2008-03-18 05:24:00	12.8731	24.5691	22.9794	23.1573	22.9794	22.8732	23.015	23.1039	23.0683	23.0505	23.1217	23.0861	22.9263	22.944	23.0505	23.2287	7.8852	7.83417	7.8852	7.91075	7.87244	7.89798	7.85962	7.87244	7.8852	7.89798	7.92355	7.92355	7.85962	7.85962	7.83417	7.80859	7.85962	7.87244	7.87244	7.84688	7.78301	7.8852	7.79578	22.944	22.5911	22.8732	23.1573
2008-03-18 05:24:20	12.8731	24.5691	22.9794	23.1573	22.9794	22.8732	22.9794	23.0861	23.0505	23.0505	23.1039	23.0861	22.8732	22.9086	23.0327	23.193	7.89798	7.84688	7.87244	7.91075	7.87244	7.89798	7.85962	7.85962	7.89798	7.8852	7.92355	7.91075	7.85962	7.87244	7.82133	7.80859	7.85962	7.87244	7.87244	7.83417	7.77031	7.89798	7.79578	22.9086	22.5911	22.8024	23.1217
2008-03-18 05:24:40	12.8731	24.5691	22.9617	23.1395	22.9794	22.8732	22.9617	23.0861	23.0505	23.0505	23.1039	23.0861	22.8732	22.8732	23.015	23.1573	7.89798	7.83417	7.8852	7.91075	7.85962	7.89798	7.85962	7.87244	7.89798	7.8852	7.92355	7.91075	7.87244	7.87244	7.83417	7.79578	7.85962	7.85962	7.87244	7.84688	7.77031	7.8852	7.79578	22.8732	22.5736	22.7672	23.0861
2008-03-18 05:25:00	12.8731	24.5691	22.944	23.1217	22.9794	22.8555	22.944	23.0505	23.0505	23.0327	23.0861	23.0505	22.8732	22.8732	22.9794	23.1217	7.89798	7.83417	7.8852	7.91075	7.85962	7.89798	7.84688	7.87244	7.89798	7.8852	7.92355	7.91075	7.85962	7.85962	7.83417	7.79578	7.85962	7.85962	7.85962	7.84688	7.78301	7.89798	7.79578	22.8378	22.556	22.6967	23.0505
2008-03-18 05:25:20	12.8731	24.5691	22.944	23.0861	22.9794	22.8555	22.9086	23.0505	23.0327	23.015	23.0861	23.0505	22.8732	22.8732	22.9794	23.1217	7.8852	7.84688	7.8852	7.91075	7.85962	7.8852	7.84688	7.85962	7.89798	7.89798	7.92355	7.91075	7.85962	7.84688	7.83417	7.79578	7.85962	7.85962	7.85962	7.84688	7.78301	7.8852	7.78301	22.8378	22.5209	22.6614	23.015
2008-03-18 05:25:40	12.8731	24.5691	22.944	23.0861	22.9794	22.8378	22.8732	23.015	23.015	23.015	23.0861	23.0505	22.8732	22.8378	22.944	23.1217	7.8852	7.84688	7.8852	7.91075	7.85962	7.8852	7.84688	7.85962	7.89798	7.89798	7.92355	7.89798	7.84688	7.85962	7.83417	7.79578	7.85962	7.85962	7.87244	7.83417	7.78301	7.8852	7.78301	22.8024	22.5209	22.6438	23.015
2008-03-18 05:26:00	12.8731	24.5985	22.944	23.0505	22.9617	22.8378	22.8732	23.015	23.015	23.015	23.0861	23.015	22.8732	22.8024	22.944	23.0861	7.8852	7.83417	7.8852	7.89798	7.85962	7.8852	7.84688	7.85962	7.8852	7.89798	7.92355	7.91075	7.85962	7.85962	7.82133	7.79578	7.85962	7.85962	7.85962	7.84688	7.78301	7.87244	7.78301	22.8024	22.5209	22.5911	22.9794
2008-03-18 05:26:20	12.8731	24.5985	22.9086	23.0505	22.944	22.8378	22.8378	23.015	23.015	23.015	23.0861	23.015	22.8732	22.8024	22.9263	23.0505	7.87244	7.84688	7.87244	7.89798	7.85962	7.8852	7.84688	7.85962	7.8852	7.8852	7.92355	7.91075	7.84688	7.85962	7.82133	7.78301	7.85962	7.85962	7.85962	7.83417	7.77031	7.87244	7.78301	22.7672	22.5209	22.5911	22.944
2008-03-18 05:26:40	12.8786	24.5985	22.9086	23.015	22.9617	22.8378	22.8024	23.015	23.015	23.015	23.0683	23.015	22.8732	22.8024	22.9086	23.0327	7.8852	7.83417	7.8852	7.91075	7.85962	7.89798	7.85962	7.85962	7.89798	7.8852	7.92355	7.89798	7.85962	7.85962	7.83417	7.78301	7.85962	7.85962	7.85962	7.83417	7.77031	7.8852	7.78301	22.7672	22.4859	22.556	22.9086
2008-03-18 05:27:00	12.8731	24.5985	22.9086	23.015	22.944	22.8378	22.8024	22.9972	23.015	23.015	23.0505	22.9972	22.8555	22.7848	22.9086	23.0505	7.87244	7.83417	7.87244	7.89798	7.84688	7.89798	7.84688	7.85962	7.8852	7.8852	7.91075	7.89798	7.85962	7.84688	7.82133	7.79578	7.85962	7.85962	7.85962	7.83417	7.77031	7.8852	7.78301	22.7495	22.4859	22.5209	22.8732
2008-03-18 05:27:20	12.8731	24.5985	22.9086	23.015	22.944	22.8024	22.7672	22.9794	22.9794	23.015	23.0505	22.9794	22.8378	22.7672	22.8732	23.0505	7.8852	7.83417	7.87244	7.91075	7.85962	7.89798	7.84688	7.85962	7.89798	7.8852	7.91075	7.89798	7.84688	7.84688	7.82133	7.79578	7.84688	7.84688	7.84688	7.83417	7.77031	7.8852	7.78301	22.7319	22.4508	22.5209	22.8378
2008-03-18 05:27:40	12.8731	24.5985	22.8732	22.9794	22.944	22.8378	22.7672	22.9794	22.9794	22.9794	23.0505	22.9794	22.8378	22.7319	22.8732	22.9794	7.8852	7.83417	7.87244	7.89798	7.84688	7.8852	7.84688	7.85962	7.8852	7.8852	7.92355	7.89798	7.85962	7.85962	7.82133	7.79578	7.84688	7.85962	7.84688	7.83417	7.77031	7.8852	7.77031	22.7319	22.4508	22.4508	22.8024
2008-03-18 05:28:00	12.8786	24.5985	22.8732	22.9617	22.944	22.8024	22.7319	22.944	22.9617	22.9794	23.015	22.9794	22.8201	22.7319	22.8732	22.944	7.8852	7.82133	7.87244	7.89798	7.84688	7.8852	7.84688	7.84688	7.87244	7.8852	7.91075	7.91075	7.84688	7.85962	7.82133	7.79578	7.84688	7.84688	7.84688	7.83417	7.77031	7.8852	7.79578	22.6967	22.4508	22.4158	22.7848
2008-03-18 05:28:20	12.8731	24.5985	22.8732	22.944	22.944	22.8024	22.7143	22.944	22.944	22.9794	23.015	22.9617	22.8201	22.6967	22.8378	22.944	7.87244	7.83417	7.87244	7.91075	7.85962	7.8852	7.84688	7.85962	7.8852	7.87244	7.91075	7.89798	7.84688	7.84688	7.82133	7.79578	7.85962	7.84688	7.85962	7.83417	7.75754	7.85962	7.78301	22.6967	22.4158	22.3809	22.7495
2008-03-18 05:28:40	12.8731	24.5985	22.8732	22.944	22.9263	22.8024	22.6967	22.944	22.944	22.9617	23.015	22.944	22.8024	22.679	22.8378	22.944	7.8852	7.83417	7.87244	7.89798	7.84688	7.8852	7.83417	7.85962	7.8852	7.8852	7.91075	7.89798	7.84688	7.84688	7.80859	7.79578	7.85962	7.85962	7.84688	7.83417	7.77031	7.87244	7.77031	22.6614	22.4158	22.346	22.7143
2008-03-18 05:29:00	12.8731	24.6279	22.8378	22.9086	22.9086	22.8024	22.6614	22.9086	22.944	22.944	23.015	22.944	22.8024	22.6438	22.8024	22.8732	7.8852	7.82133	7.85962	7.91075	7.83417	7.8852	7.84688	7.84688	7.8852	7.8852	7.92355	7.89798	7.84688	7.84688	7.80859	7.78301	7.84688	7.84688	7.84688	7.82133	7.75754	7.87244	7.78301	22.6614	22.3809	22.3111	22.6614
2008-03-18 05:29:20	12.8731	24.6279	22.8361	22.8715	22.9069	22.8008	22.6422	22.8715	22.9246	22.9424	22.9956	22.9424	22.7655	22.6246	22.8008	22.8185	7.88423	7.83311	7.87144	7.897	7.83311	7.87144	7.83311	7.85865	7.87144	7.88423	7.92256	7.897	7.84589	7.84589	7.80755	7.78208	7.83311	7.84589	7.84589	7.82037	7.75655	7.87144	7.76928	22.6422	22.3792	22.2397	22.6246
2008-03-18 05:29:40	12.8731	24.6279	22.8011	22.8718	22.9073	22.8011	22.6249	22.8718	22.9073	22.9427	22.9781	22.9073	22.7306	22.5898	22.8011	22.8011	7.87162	7.82054	7.87162	7.89718	7.83333	7.88438	7.83333	7.84604	7.87162	7.87162	7.91	7.88438	7.84604	7.84604	7.8078	7.79502	7.84604	7.85887	7.84604	7.82054	7.75671	7.85887	7.78224	22.6249	22.3795	22.2053	22.5898
2008-03-18 05:30:00	12.8731	24.6279	22.8011	22.8365	22.9073	22.7658	22.5898	22.8718	22.9073	22.9427	22.9781	22.9073	22.7306	22.5898	22.7658	22.7834	7.87162	7.82054	7.87162	7.89718	7.84604	7.88438	7.84604	7.84604	7.88438	7.88438	7.92275	7.89718	7.83333	7.84604	7.82054	7.78224	7.85887	7.84604	7.84604	7.82054	7.75671	7.87162	7.76949	22.5898	22.3446	22.1705	22.5898
2008-03-18 05:30:20	12.8731	24.6279	22.8014	22.819	22.9075	22.7661	22.5726	22.8721	22.8721	22.9075	22.9607	22.8898	22.7308	22.5549	22.7661	22.7661	7.87178	7.82069	7.85902	7.89737	7.83348	7.88454	7.84621	7.84621	7.88454	7.87178	7.91014	7.88454	7.84621	7.84621	7.80795	7.79514	7.84621	7.84621	7.84621	7.82069	7.7569	7.87178	7.78242	22.5901	22.3449	22.1707	22.5549
2008-03-18 05:30:40	12.8731	24.6279	22.8014	22.8014	22.8721	22.7661	22.5549	22.8367	22.8721	22.9075	22.9607	22.8721	22.7308	22.5549	22.7308	22.7661	7.87178	7.80795	7.85902	7.89737	7.83348	7.87178	7.83348	7.84621	7.87178	7.87178	7.91014	7.89737	7.83348	7.83348	7.82069	7.79514	7.84621	7.84621	7.84621	7.82069	7.7569	7.87178	7.76963	22.5901	22.31	22.136	22.5199
2008-03-18 05:31:00	12.8731	24.6279	22.7663	22.8016	22.8723	22.7663	22.5201	22.8369	22.8723	22.9077	22.9432	22.8723	22.731	22.5201	22.731	22.731	7.87189	7.80808	7.85916	7.89747	7.83359	7.87189	7.83359	7.84638	7.87189	7.88469	7.91026	7.88469	7.84638	7.83359	7.82081	7.78251	7.84638	7.83359	7.84638	7.82081	7.75706	7.87189	7.7698	22.5903	22.3102	22.1014	22.5201
2008-03-18 05:31:20	12.8731	24.6279	22.7665	22.7665	22.8724	22.7665	22.5203	22.8018	22.8724	22.9079	22.9433	22.8724	22.696	22.5203	22.7311	22.6783	7.8592	7.82092	7.8592	7.8976	7.84642	7.87197	7.83366	7.84642	7.87197	7.87197	7.91036	7.88476	7.83366	7.84642	7.80816	7.78265	7.83366	7.84642	7.84642	7.82092	7.7571	7.87197	7.76987	22.5729	22.3104	22.1016	22.5203
2008-03-18 05:31:40	12.8731	24.6279	22.7665	22.7665	22.8724	22.7488	22.5203	22.8018	22.8548	22.8902	22.9433	22.8724	22.6607	22.4851	22.7311	22.6607	7.87197	7.82092	7.8592	7.8976	7.84642	7.87197	7.83366	7.84642	7.87197	7.87197	7.91036	7.88476	7.84642	7.84642	7.80816	7.78265	7.84642	7.84642	7.84642	7.82092	7.74436	7.8592	7.76987	22.5552	22.3104	22.067	22.4851
2008-03-18 05:32:00	12.8731	24.6279	22.7313	22.7313	22.8727	22.7313	22.4853	22.7666	22.8373	22.8727	22.9257	22.8373	22.6608	22.4853	22.6961	22.6257	7.87209	7.82098	7.85932	7.89766	7.84653	7.85932	7.83377	7.84653	7.85932	7.85932	7.89766	7.88489	7.83377	7.83377	7.80825	7.7827	7.83377	7.84653	7.84653	7.82098	7.74445	7.85932	7.76997	22.5554	22.2756	22.0324	22.4502
2008-03-18 05:32:20	12.8731	24.6279	22.7314	22.7314	22.8727	22.7314	22.4504	22.7666	22.8373	22.8727	22.9082	22.8373	22.6434	22.4504	22.6962	22.5555	7.87214	7.82106	7.85935	7.88493	7.83377	7.87214	7.83377	7.8466	7.87214	7.85935	7.91048	7.88493	7.8466	7.83377	7.82106	7.78275	7.83377	7.8466	7.83377	7.82106	7.74451	7.85935	7.77004	22.5379	22.2583	21.9633	22.3979
2008-03-18 05:32:40	12.8731	24.6279	22.7314	22.6962	22.8373	22.7314	22.4154	22.7314	22.802	22.8727	22.9082	22.802	22.6258	22.4154	22.661	22.5205	7.87214	7.80829	7.8466	7.88493	7.83377	7.87214	7.83377	7.83377	7.87214	7.85935	7.89771	7.88493	7.83377	7.83377	7.82106	7.78275	7.83377	7.83377	7.8466	7.82106	7.75727	7.85935	7.77004	22.5205	22.2409	21.9287	22.3804
2008-03-18 05:33:00	12.8731	24.6279	22.6962	22.661	22.8374	22.7316	22.3804	22.6962	22.8021	22.8374	22.9082	22.8021	22.5908	22.3804	22.661	22.503	7.8594	7.80832	7.8594	7.88499	7.83389	7.87223	7.83389	7.83389	7.87223	7.8594	7.91051	7.88499	7.83389	7.83389	7.80832	7.78284	7.84665	7.84665	7.83389	7.82107	7.74456	7.8594	7.77009	22.4855	22.241	21.8598	22.3456
2008-03-18 05:33:20	12.8731	24.6279	22.6962	22.661	22.8374	22.7316	22.363	22.6962	22.8021	22.8374	22.8728	22.8021	22.5908	22.3804	22.6435	22.5206	7.8594	7.80832	7.8594	7.88499	7.83389	7.87223	7.83389	7.83389	7.87223	7.87223	7.91051	7.88499	7.83389	7.83389	7.79559	7.77009	7.84665	7.83389	7.83389	7.82107	7.74456	7.87223	7.77009	22.4855	22.2061	21.8253	22.3107
2008-03-18 05:33:40	12.8731	24.6279	22.6788	22.626	22.8375	22.7316	22.3456	22.6611	22.7669	22.8375	22.8729	22.7669	22.626	22.3806	22.626	22.5031	7.85949	7.80841	7.85949	7.88501	7.83393	7.87225	7.83393	7.84669	7.87225	7.87225	7.89781	7.88501	7.83393	7.83393	7.80841	7.78285	7.84669	7.83393	7.83393	7.82117	7.74459	7.87225	7.77012	22.4855	22.2062	21.8255	22.2933
2008-03-18 05:34:00	12.8731	24.6279	22.6611	22.6261	22.8375	22.6964	22.3283	22.6611	22.7669	22.8375	22.8729	22.7669	22.5908	22.3806	22.6261	22.5207	7.87224	7.82118	7.85949	7.87224	7.83392	7.85949	7.83392	7.83392	7.85949	7.87224	7.89783	7.88505	7.82118	7.83392	7.8084	7.78291	7.83392	7.84677	7.83392	7.82118	7.75734	7.85949	7.75734	22.4856	22.2063	21.8255	22.2759
2008-03-18 05:34:20	12.8731	24.6279	22.6611	22.6261	22.8375	22.6964	22.3109	22.6611	22.7669	22.8375	22.8553	22.7669	22.5908	22.3631	22.6261	22.5207	7.85949	7.8084	7.85949	7.88505	7.83392	7.87224	7.83392	7.84677	7.87224	7.87224	7.89783	7.88505	7.83392	7.83392	7.8084	7.77013	7.83392	7.83392	7.83392	7.82118	7.75734	7.85949	7.75734	22.4506	22.1715	21.8255	22.2585
2008-03-18 05:34:40	12.8731	24.6279	22.6612	22.626	22.8022	22.6964	22.3108	22.6612	22.767	22.8199	22.8376	22.7317	22.5909	22.3458	22.6085	22.5207	7.85949	7.8212	7.84672	7.88504	7.834	7.87233	7.8212	7.834	7.87233	7.85949	7.89784	7.88504	7.834	7.834	7.80849	7.77019	7.834	7.834	7.834	7.8212	7.7574	7.85949	7.7574	22.4506	22.1716	21.8255	22.2412
2008-03-18 05:35:00	12.8786	24.6279	22.6613	22.5909	22.8023	22.6965	22.3109	22.6613	22.7493	22.8023	22.8377	22.7317	22.5734	22.3458	22.5909	22.4857	7.85952	7.80846	7.84676	7.88511	7.83399	7.85952	7.82123	7.83399	7.87234	7.85952	7.91064	7.88511	7.83399	7.83399	7.80846	7.77017	7.83399	7.83399	7.83399	7.80846	7.74467	7.85952	7.75744	22.4506	22.1715	21.7911	22.2412
2008-03-18 05:35:20	12.8731	24.6279	22.6261	22.5909	22.8023	22.6613	22.2935	22.6261	22.7317	22.8023	22.8377	22.7317	22.5383	22.3109	22.6085	22.4506	7.85952	7.82123	7.84676	7.88511	7.83399	7.87234	7.82123	7.83399	7.85952	7.85952	7.89791	7.87234	7.83399	7.82123	7.80846	7.77017	7.83399	7.83399	7.83399	7.82123	7.74467	7.84676	7.77017	22.4506	22.1715	21.7911	22.2064
2008-03-18 05:35:40	12.8731	24.6279	22.6261	22.5909	22.8023	22.6613	22.276	22.6261	22.7318	22.8023	22.82	22.7318	22.5208	22.3109	22.5909	22.4157	7.85957	7.79571	7.84678	7.88512	7.83403	7.85957	7.82124	7.83403	7.87233	7.87233	7.8979	7.88512	7.83403	7.83403	7.79571	7.7702	7.83403	7.82124	7.83403	7.80849	7.74471	7.85957	7.75744	22.4507	22.1716	21.7567	22.1716
2008-03-18 05:36:00	12.8786	24.6279	22.6261	22.5909	22.8023	22.6613	22.276	22.6086	22.7318	22.8023	22.8023	22.6965	22.5208	22.276	22.5909	22.4332	7.85957	7.80849	7.85957	7.88512	7.82124	7.87233	7.82124	7.84678	7.85957	7.87233	7.8979	7.88512	7.83403	7.82124	7.79571	7.7702	7.83403	7.83403	7.83403	7.82124	7.74471	7.84678	7.7702	22.4332	22.1369	21.7567	22.1716
2008-03-18 05:36:20	12.8731	24.6279	22.607	22.5542	22.8007	22.6597	22.2396	22.5894	22.7301	22.8007	22.8007	22.6949	22.5367	22.2744	22.5894	22.4491	7.85857	7.80754	7.85857	7.88413	7.83306	7.85857	7.82027	7.83306	7.87138	7.85857	7.89695	7.87138	7.82027	7.82027	7.79477	7.75647	7.82027	7.82027	7.83306	7.80754	7.74373	7.85857	7.75647	22.4141	22.1353	21.7552	22.17
2008-03-18 05:36:40	12.8786	24.6279	22.5897	22.5546	22.8011	22.66	22.2399	22.5897	22.7128	22.7658	22.7834	22.6953	22.5195	22.2748	22.5897	22.4144	7.85877	7.80772	7.846	7.87158	7.82045	7.85877	7.82045	7.83329	7.846	7.85877	7.88434	7.88434	7.82045	7.83329	7.79493	7.76949	7.82045	7.82045	7.83329	7.80772	7.74393	7.85877	7.7567	22.4144	22.1356	21.721	22.1356
2008-03-18 05:37:00	12.8786	24.6279	22.5897	22.537	22.7658	22.66	22.2399	22.5897	22.6953	22.7658	22.7834	22.66	22.5195	22.2399	22.5722	22.4144	7.85877	7.80772	7.846	7.87158	7.83329	7.85877	7.82045	7.83329	7.85877	7.85877	7.89712	7.88434	7.82045	7.82045	7.80772	7.76949	7.82045	7.83329	7.82045	7.80772	7.74393	7.85877	7.76949	22.4144	22.1356	21.721	22.1182
2008-03-18 05:37:20	12.8786	24.6279	22.5899	22.5198	22.766	22.6603	22.2055	22.5549	22.6955	22.766	22.766	22.6603	22.4497	22.2402	22.5549	22.3448	7.84621	7.79511	7.83341	7.88451	7.82065	7.85898	7.82065	7.82065	7.85898	7.85898	7.88451	7.88451	7.82065	7.82065	7.78236	7.76962	7.83341	7.82065	7.82065	7.80789	7.74411	7.84621	7.75687	22.4147	22.1186	21.687	22.1012
2008-03-18 05:37:40	12.8677	24.6279	22.5902	22.52	22.7663	22.6253	22.2057	22.5375	22.6606	22.7486	22.7663	22.6606	22.4499	22.2057	22.5551	22.3102	7.85913	7.808	7.84638	7.87186	7.83358	7.85913	7.82082	7.82082	7.85913	7.85913	7.88467	7.88467	7.82082	7.83358	7.79529	7.76975	7.82082	7.82082	7.82082	7.808	7.74426	7.84638	7.74426	22.3799	22.1014	21.6529	22.0667
2008-03-18 05:38:00	12.8731	24.6279	22.5551	22.5025	22.7663	22.6253	22.1709	22.52	22.6606	22.731	22.7486	22.6429	22.4499	22.2057	22.52	22.3102	7.85913	7.808	7.84638	7.88467	7.82082	7.85913	7.82082	7.83358	7.85913	7.85913	7.89742	7.87186	7.82082	7.82082	7.7825	7.75699	7.82082	7.82082	7.82082	7.808	7.74426	7.84638	7.75699	22.3799	22.1014	21.6186	22.0494
2008-03-18 05:38:20	12.8731	24.6279	22.5553	22.4851	22.7312	22.6255	22.1711	22.5202	22.6255	22.7312	22.7312	22.6255	22.4151	22.1711	22.5202	22.2406	7.84642	7.79538	7.84642	7.87199	7.8209	7.84642	7.8209	7.8209	7.85923	7.85923	7.88475	7.87199	7.8209	7.8209	7.79538	7.76985	7.8209	7.83366	7.83366	7.80813	7.74436	7.85923	7.75711	22.3801	22.1016	21.5845	22.0322
2008-03-18 05:38:40	12.8731	24.6279	22.5202	22.4851	22.7312	22.6255	22.1537	22.4851	22.6255	22.7312	22.7312	22.6255	22.3801	22.1711	22.5202	22.2406	7.85923	7.80813	7.84642	7.87199	7.8209	7.85923	7.8209	7.8209	7.85923	7.85923	7.89755	7.88475	7.8209	7.8209	7.79538	7.76985	7.8209	7.8209	7.8209	7.79538	7.74436	7.84642	7.75711	22.3627	22.1016	21.5845	22.0322
2008-03-18 05:39:00	12.8731	24.6279	22.5203	22.4502	22.7313	22.6082	22.1364	22.4853	22.6256	22.7313	22.7313	22.6256	22.3978	22.1711	22.5203	22.2408	7.8465	7.79543	7.8465	7.87208	7.82098	7.85933	7.82098	7.82098	7.8465	7.8465	7.88482	7.87208	7.82098	7.82098	7.79543	7.75716	7.82098	7.82098	7.83371	7.8082	7.74441	7.8465	7.75716	22.3454	22.067	21.5504	21.9978
2008-03-18 05:39:20	12.8731	24.6279	22.5205	22.4503	22.7314	22.6257	22.1018	22.4503	22.6257	22.7137	22.7137	22.5907	22.3804	22.1713	22.5205	22.2408	7.84658	7.79553	7.83384	7.88493	7.83384	7.84658	7.80828	7.83384	7.84658	7.84658	7.88493	7.87218	7.80828	7.83384	7.80828	7.75723	7.82104	7.82104	7.82104	7.80828	7.73173	7.84658	7.75723	22.3455	22.0672	21.5505	21.9632
2008-03-18 05:39:40	12.8731	24.6279	22.5205	22.4503	22.7314	22.5907	22.1018	22.4503	22.5907	22.6962	22.6962	22.5907	22.3804	22.1365	22.5205	22.2408	7.84658	7.79553	7.83384	7.87218	7.82104	7.85938	7.82104	7.82104	7.84658	7.85938	7.88493	7.87218	7.82104	7.80828	7.78275	7.75723	7.82104	7.82104	7.82104	7.80828	7.73173	7.84658	7.74448	22.3455	22.0672	21.5163	21.9632
2008-03-18 05:40:00	12.8731	24.6279	22.503	22.4329	22.7315	22.5908	22.102	22.4504	22.5908	22.6963	22.6963	22.5908	22.3805	22.1366	22.4855	22.2062	7.8594	7.79556	7.8339	7.8594	7.82111	7.8594	7.82111	7.82111	7.84664	7.8594	7.88496	7.88496	7.82111	7.82111	7.78284	7.75732	7.82111	7.82111	7.82111	7.80836	7.73182	7.84664	7.74454	22.3281	22.0326	21.5165	21.9634
2008-03-18 05:40:20	12.8731	24.6279	22.5031	22.4156	22.7139	22.5908	22.102	22.4505	22.5908	22.6963	22.6963	22.5908	22.3805	22.102	22.4855	22.2062	7.85947	7.79558	7.83394	7.87222	7.82114	7.85947	7.80839	7.82114	7.84664	7.84664	7.88498	7.85947	7.80839	7.82114	7.78285	7.75738	7.82114	7.82114	7.82114	7.80839	7.73183	7.84664	7.74459	22.3107	22.0327	21.5165	21.9635
2008-03-18 05:40:40	12.8731	24.5985	22.4855	22.4156	22.7139	22.5908	22.0673	22.433	22.5908	22.6963	22.6787	22.5908	22.3805	22.102	22.4855	22.2062	7.84664	7.78285	7.83394	7.87222	7.80839	7.85947	7.80839	7.82114	7.84664	7.84664	7.88498	7.87222	7.80839	7.82114	7.79558	7.75738	7.82114	7.82114	7.82114	7.80839	7.73183	7.84664	7.75738	22.3107	22.0327	21.4822	21.9288
2008-03-18 05:41:00	12.8731	24.5985	22.4856	22.3981	22.6963	22.5909	22.0673	22.4156	22.5909	22.6612	22.6612	22.5558	22.3806	22.102	22.4856	22.1715	7.83395	7.7829	7.83395	7.87224	7.8084	7.84675	7.82119	7.82119	7.84675	7.84675	7.88506	7.87224	7.82119	7.82119	7.7829	7.75738	7.8084	7.82119	7.8084	7.8084	7.73191	7.84675	7.75738	22.3108	22.0327	21.4823	21.9289
2008-03-18 05:41:20	12.8731	24.6279	22.4856	22.3806	22.6963	22.5909	22.05	22.4156	22.5909	22.6612	22.6612	22.5558	22.3806	22.102	22.4856	22.1715	7.84675	7.8084	7.83395	7.85947	7.8084	7.84675	7.8084	7.82119	7.84675	7.84675	7.88506	7.87224	7.82119	7.82119	7.7829	7.75738	7.82119	7.82119	7.82119	7.8084	7.73191	7.84675	7.75738	22.3108	22.0327	21.4823	21.8944
2008-03-18 05:41:40	12.8731	24.6279	22.484	22.379	22.6947	22.5892	22.0312	22.414	22.5716	22.6596	22.6596	22.5542	22.379	22.1004	22.449	22.1873	7.84573	7.79469	7.83299	7.8713	7.82025	7.85852	7.80746	7.82025	7.85852	7.84573	7.88409	7.85852	7.82025	7.82025	7.78192	7.75641	7.82025	7.82025	7.82025	7.79469	7.73092	7.83299	7.74367	22.3092	22.0312	21.4808	21.8928
2008-03-18 05:42:00	12.8727	24.5985	22.4668	22.3794	22.6952	22.5896	22.0315	22.4144	22.5896	22.66	22.6248	22.5546	22.3794	22.1008	22.4493	22.1703	7.83323	7.79493	7.84598	7.87154	7.82044	7.85875	7.80768	7.80768	7.84598	7.84598	7.8843	7.87154	7.82044	7.82044	7.78215	7.75666	7.80768	7.82044	7.80768	7.78215	7.73115	7.83323	7.74391	22.3096	22.0142	21.4812	21.8932
2008-03-18 05:42:20	12.8727	24.5985	22.4493	22.3794	22.66	22.5546	22.0315	22.3794	22.5546	22.66	22.6248	22.5369	22.3445	22.0835	22.4493	22.1356	7.84598	7.79493	7.84598	7.85875	7.80768	7.84598	7.82044	7.82044	7.84598	7.84598	7.87154	7.87154	7.80768	7.82044	7.78215	7.75666	7.80768	7.82044	7.82044	7.79493	7.73115	7.84598	7.74391	22.3096	22.0315	21.4812	21.8932
2008-03-18 05:42:40	12.8673	24.5985	22.4496	22.3797	22.6602	22.5548	22.0318	22.3797	22.5548	22.6602	22.625	22.5197	22.3797	22.0664	22.4496	22.1359	7.84614	7.79507	7.82061	7.85888	7.80785	7.84614	7.80785	7.82061	7.84614	7.84614	7.87171	7.87171	7.80785	7.82061	7.79507	7.74404	7.80785	7.82061	7.82061	7.78235	7.7313	7.84614	7.74404	22.3098	22.0318	21.4815	21.859
2008-03-18 05:43:00	12.8729	24.5985	22.4498	22.3799	22.6605	22.555	22.0147	22.3799	22.555	22.6605	22.6253	22.5199	22.3624	22.0667	22.4498	22.1534	7.84629	7.79523	7.83351	7.85905	7.82072	7.84629	7.80802	7.80802	7.83351	7.84629	7.88461	7.87183	7.80802	7.80802	7.78249	7.74418	7.80802	7.82072	7.82072	7.79523	7.7187	7.83351	7.74418	22.3101	22.032	21.4646	21.8592
2008-03-18 05:43:20	12.8729	24.5985	22.4498	22.3799	22.6605	22.555	21.9974	22.3799	22.555	22.6253	22.6253	22.5199	22.345	22.0667	22.4498	22.136	7.83351	7.78249	7.83351	7.85905	7.82072	7.84629	7.80802	7.80802	7.84629	7.84629	7.87183	7.87183	7.80802	7.80802	7.78249	7.75695	7.80802	7.82072	7.82072	7.79523	7.7187	7.83351	7.74418	22.3101	22.032	21.4474	21.8592
2008-03-18 05:43:40	12.8729	24.5985	22.4501	22.3627	22.6607	22.5201	21.9976	22.3801	22.5376	22.6254	22.6254	22.5201	22.3452	22.0322	22.4501	22.1016	7.83364	7.7826	7.82085	7.8592	7.80811	7.84636	7.80811	7.80811	7.84636	7.83364	7.8847	7.8592	7.80811	7.80811	7.7826	7.74431	7.80811	7.80811	7.82085	7.7826	7.71882	7.83364	7.74431	22.2753	22.0149	21.4477	21.825
2008-03-18 05:44:00	12.8729	24.5985	22.4501	22.3452	22.6607	22.5201	21.9803	22.3801	22.5201	22.6254	22.5903	22.5201	22.3277	22.0322	22.4501	22.1016	7.84636	7.79532	7.83364	7.8592	7.80811	7.84636	7.79532	7.80811	7.84636	7.84636	7.87195	7.8592	7.80811	7.80811	7.7826	7.74431	7.80811	7.80811	7.82085	7.7826	7.71882	7.83364	7.75706	22.2753	21.9976	21.4136	21.825
2008-03-18 05:44:20	12.878	24.5985	22.431	22.3437	22.6591	22.5186	21.9615	22.3437	22.5186	22.6239	22.5889	22.4836	22.3088	22.0308	22.4486	22.0654	7.8327	7.78169	7.8327	7.85832	7.79444	7.8327	7.79444	7.80719	7.84552	7.8327	7.87108	7.85832	7.80719	7.80719	7.76895	7.74344	7.80719	7.81999	7.81999	7.79444	7.71795	7.8327	7.74344	22.2391	21.9961	21.4122	21.8235
2008-03-18 05:44:40	12.8777	24.5985	22.4315	22.3442	22.6245	22.5191	21.962	22.3442	22.5191	22.6245	22.5893	22.484	22.3266	22.0312	22.449	22.0658	7.83299	7.78197	7.83299	7.85855	7.80749	7.84578	7.80749	7.80749	7.84578	7.84578	7.87131	7.85855	7.80749	7.80749	7.76921	7.75644	7.80749	7.80749	7.80749	7.79473	7.71817	7.83299	7.74369	22.2395	21.9965	21.4126	21.824
2008-03-18 05:45:00	12.8722	24.5985	22.4141	22.3442	22.6245	22.5191	21.962	22.3442	22.5191	22.6068	22.5893	22.484	22.3092	22.0312	22.449	22.0658	7.83299	7.78197	7.83299	7.84578	7.79473	7.84578	7.80749	7.82028	7.83299	7.84578	7.87131	7.85855	7.80749	7.79473	7.78197	7.74369	7.80749	7.80749	7.80749	7.78197	7.71817	7.83299	7.73092	22.2395	21.9965	21.4126	21.824
2008-03-18 05:45:20	12.8614	24.5985	22.4143	22.327	22.6247	22.5194	21.9623	22.3445	22.5194	22.5897	22.5897	22.4669	22.3096	22.0316	22.4319	22.0662	7.84602	7.78218	7.82047	7.84602	7.79495	7.84602	7.79495	7.8077	7.83322	7.84602	7.88432	7.84602	7.79495	7.8077	7.78218	7.75668	7.8077	7.8077	7.82047	7.78218	7.70563	7.84602	7.74389	22.2399	21.9969	21.4129	21.8243
2008-03-18 05:45:40	12.8725	24.5985	22.4146	22.3098	22.6251	22.5198	21.9626	22.3273	22.5198	22.5899	22.5899	22.4497	22.3098	21.9972	22.4146	22.0665	7.83337	7.76958	7.83337	7.85892	7.80783	7.84618	7.79509	7.80783	7.83337	7.83337	7.8717	7.85892	7.79509	7.80783	7.78236	7.74406	7.80783	7.80783	7.80783	7.79509	7.71858	7.83337	7.73133	22.2402	21.9972	21.4132	21.8073
2008-03-18 05:46:00	12.8725	24.5985	22.4146	22.3098	22.6251	22.5198	21.9626	22.3098	22.5198	22.5899	22.5723	22.4497	22.3098	21.9972	22.4146	22.0665	7.83337	7.78236	7.82063	7.85892	7.79509	7.83337	7.80783	7.79509	7.84618	7.84618	7.8717	7.85892	7.80783	7.80783	7.76958	7.74406	7.80783	7.80783	7.80783	7.78236	7.73133	7.83337	7.74406	22.2402	21.9972	21.4132	21.7901
2008-03-18 05:46:20	12.8727	24.5985	22.3799	22.3101	22.6253	22.52	21.9455	22.3101	22.4849	22.5902	22.5726	22.4498	22.2926	21.9974	22.4149	22.0667	7.83353	7.78248	7.82075	7.8591	7.79521	7.83353	7.79521	7.80801	7.84629	7.83353	7.87185	7.8591	7.79521	7.80801	7.78248	7.74417	7.80801	7.80801	7.80801	7.78248	7.7187	7.83353	7.74417	22.2404	21.9974	21.4134	21.7903
2008-03-18 05:46:40	12.8727	24.5985	22.3974	22.3101	22.6253	22.52	21.9283	22.3101	22.5024	22.5902	22.555	22.4498	22.2752	21.9974	22.4149	22.032	7.83353	7.78248	7.82075	7.8591	7.80801	7.83353	7.79521	7.80801	7.84629	7.83353	7.8591	7.8591	7.80801	7.80801	7.76973	7.75696	7.79521	7.80801	7.80801	7.78248	7.7187	7.83353	7.73146	22.2404	21.9974	21.3794	21.7903
2008-03-18 05:47:00	12.8728	24.5691	22.3801	22.3103	22.6254	22.5202	21.9285	22.3103	22.485	22.5904	22.5553	22.4501	22.2755	21.9803	22.4151	22.0322	7.83366	7.76984	7.82086	7.84644	7.80814	7.84644	7.79536	7.80814	7.83366	7.83366	7.87194	7.85918	7.80814	7.80814	7.76984	7.7443	7.80814	7.80814	7.80814	7.78256	7.71886	7.83366	7.73159	22.2406	21.9631	21.3796	21.7905
2008-03-18 05:47:20	12.8728	24.5691	22.3786	22.3088	22.6239	22.5187	21.927	22.3088	22.4836	22.5889	22.5362	22.4486	22.2739	21.9788	22.4136	22.0308	7.83276	7.78167	7.81997	7.8455	7.79443	7.83276	7.79443	7.80725	7.83276	7.83276	7.87108	7.8455	7.79443	7.79443	7.76896	7.74342	7.80725	7.79443	7.80725	7.78167	7.71796	7.81997	7.73067	22.2391	21.9616	21.3782	21.789
2008-03-18 05:47:40	12.8728	24.5691	22.3786	22.2739	22.6239	22.4836	21.927	22.3088	22.4836	22.5537	22.5362	22.431	22.2566	21.9616	22.4136	22.0308	7.83276	7.76896	7.81997	7.8455	7.79443	7.83276	7.79443	7.80725	7.83276	7.83276	7.87108	7.8455	7.79443	7.80725	7.76896	7.74342	7.79443	7.80725	7.80725	7.78167	7.71796	7.83276	7.73067	22.2391	21.9616	21.3782	21.7546
2008-03-18 05:48:00	12.8729	24.5691	22.3791	22.2744	22.6069	22.4841	21.9102	22.2744	22.4666	22.5542	22.5191	22.414	22.2396	21.9621	22.414	22.0139	7.833	7.78194	7.80748	7.84577	7.80748	7.833	7.79469	7.79469	7.833	7.833	7.87132	7.85856	7.79469	7.80748	7.76917	7.74369	7.79469	7.79469	7.80748	7.79469	7.71822	7.82024	7.73097	22.2396	21.9792	21.3786	21.7551
2008-03-18 05:48:20	12.8729	24.5691	22.3794	22.2747	22.5896	22.4844	21.8931	22.2747	22.4494	22.5545	22.5195	22.4144	22.2399	21.9624	22.4144	21.997	7.8332	7.76941	7.82045	7.84601	7.79495	7.8332	7.79495	7.80766	7.8332	7.8332	7.8715	7.84601	7.79495	7.80766	7.76941	7.73118	7.79495	7.79495	7.80766	7.79495	7.71844	7.82045	7.73118	22.2399	21.9624	21.3448	21.7554
2008-03-18 05:48:40	12.8729	24.5691	22.3794	22.2573	22.5896	22.4844	21.8931	22.2573	22.4494	22.5545	22.5195	22.4144	22.2399	21.9624	22.3794	21.997	7.82045	7.78219	7.82045	7.85877	7.80766	7.84601	7.79495	7.79495	7.8332	7.8332	7.85877	7.85877	7.80766	7.79495	7.76941	7.74393	7.80766	7.79495	7.79495	7.78219	7.71844	7.82045	7.73118	22.2051	21.9624	21.3448	21.7554
2008-03-18 05:49:00	12.873	24.5691	22.3798	22.275	22.5899	22.4847	21.8935	22.2576	22.4496	22.5374	22.5197	22.3972	22.2576	21.9453	22.3798	21.9973	7.82062	7.76963	7.80789	7.85894	7.80789	7.83339	7.79511	7.80789	7.83339	7.83339	7.87172	7.84623	7.79511	7.79511	7.75683	7.74411	7.79511	7.80789	7.79511	7.78234	7.71857	7.82062	7.73136	22.2054	21.9626	21.3451	21.7385
2008-03-18 05:49:20	12.873	24.5691	22.3622	22.2576	22.5899	22.4847	21.8935	22.2402	22.4496	22.5197	22.5197	22.3972	22.2402	21.928	22.3798	21.9973	7.82062	7.78234	7.80789	7.84623	7.79511	7.83339	7.78234	7.79511	7.83339	7.83339	7.87172	7.84623	7.79511	7.79511	7.76963	7.73136	7.80789	7.79511	7.79511	7.78234	7.70583	7.82062	7.73136	22.2054	21.9626	21.3451	21.7213
2008-03-18 05:49:40	12.873	24.5691	22.3799	22.2404	22.5902	22.4849	21.8937	22.2404	22.4498	22.52	22.52	22.3799	22.2404	21.9629	22.3799	22.032	7.83353	7.78248	7.82075	7.84629	7.79521	7.83353	7.79521	7.80801	7.83353	7.83353	7.8591	7.84629	7.80801	7.79521	7.76973	7.74417	7.79521	7.79521	7.79521	7.78248	7.70596	7.83353	7.73146	22.2056	21.9629	21.3452	21.7216
2008-03-18 05:50:00	12.8726	24.5691	22.3627	22.2406	22.5904	22.485	21.8767	22.2406	22.4501	22.5202	22.5202	22.3801	22.2406	21.9631	22.3801	22.0148	7.83366	7.78256	7.80814	7.84644	7.79536	7.83366	7.79536	7.80814	7.83366	7.83366	7.87194	7.84644	7.79536	7.79536	7.75708	7.7443	7.80814	7.80814	7.80814	7.78256	7.70607	7.82086	7.73159	22.2058	21.9631	21.3455	21.7218
2008-03-18 05:50:20	12.8726	24.5691	22.3627	22.2406	22.5904	22.485	21.8939	22.2406	22.4501	22.5202	22.5026	22.3801	22.2406	21.9631	22.3801	21.9976	7.82086	7.78256	7.82086	7.85918	7.79536	7.82086	7.78256	7.80814	7.83366	7.82086	7.87194	7.84644	7.79536	7.79536	7.76984	7.73159	7.79536	7.79536	7.79536	7.78256	7.70607	7.80814	7.71886	22.2058	21.9631	21.3455	21.7218
2008-03-18 05:50:40	12.8727	24.5691	22.3454	22.2582	22.5905	22.4853	21.894	22.2408	22.4502	22.5202	22.5202	22.3802	22.2408	21.9631	22.3802	22.0323	7.83376	7.76993	7.82098	7.84652	7.78266	7.83376	7.79544	7.79544	7.83376	7.82098	7.85925	7.84652	7.79544	7.79544	7.76993	7.73168	7.79544	7.79544	7.80823	7.76993	7.71892	7.82098	7.73168	22.2059	21.9631	21.3797	21.7218
2008-03-18 05:51:00	12.8728	24.5691	22.3629	22.2409	22.5906	22.4503	21.8942	22.2409	22.4503	22.5204	22.4853	22.3804	22.2409	21.9633	22.3804	22.0324	7.82102	7.76999	7.80829	7.84656	7.78276	7.82102	7.79549	7.79549	7.82102	7.83384	7.85935	7.84656	7.79549	7.79549	7.75724	7.73176	7.79549	7.79549	7.79549	7.78276	7.71901	7.82102	7.71901	22.2235	21.9633	21.3798	21.722
2008-03-18 05:51:20	12.8728	24.5691	22.3454	22.2757	22.5906	22.4503	21.8942	22.2409	22.4503	22.5204	22.4853	22.3804	22.2409	21.9633	22.3804	22.0498	7.82102	7.76999	7.82102	7.84656	7.79549	7.82102	7.78276	7.79549	7.83384	7.82102	7.85935	7.84656	7.79549	7.78276	7.76999	7.73176	7.79549	7.79549	7.79549	7.76999	7.70626	7.82102	7.73176	22.2409	21.9806	21.4139	21.722
2008-03-18 05:51:40	12.8729	24.5691	22.3456	22.2758	22.5908	22.4679	21.8942	22.2584	22.4504	22.5205	22.4855	22.3805	22.241	21.9634	22.3805	22.0673	7.82111	7.7828	7.80835	7.83387	7.7828	7.82111	7.7828	7.79556	7.82111	7.82111	7.85944	7.84663	7.79556	7.79556	7.77005	7.73179	7.79556	7.7828	7.79556	7.77005	7.7063	7.82111	7.71904	22.241	21.998	21.4139	21.7565
2008-03-18 05:52:00	12.8729	24.5691	22.3456	22.2758	22.5908	22.4504	21.8942	22.2584	22.4504	22.5205	22.4855	22.3805	22.241	21.9634	22.4154	22.0673	7.82111	7.77005	7.80835	7.83387	7.7828	7.83387	7.7828	7.79556	7.82111	7.83387	7.85944	7.83387	7.7828	7.79556	7.75731	7.73179	7.79556	7.79556	7.79556	7.77005	7.7063	7.80835	7.71904	22.241	21.998	21.4139	21.7565
2008-03-18 05:52:20	12.8729	24.5691	22.3631	22.2758	22.5732	22.4505	21.8943	22.2758	22.4505	22.5206	22.4855	22.3805	22.2585	21.9635	22.4156	22.102	7.82114	7.77013	7.80839	7.83394	7.79558	7.82114	7.78285	7.78285	7.82114	7.82114	7.85947	7.84664	7.78285	7.79558	7.75738	7.73183	7.79558	7.79558	7.79558	7.77013	7.70637	7.80839	7.71912	22.241	21.998	21.4482	21.7565
2008-03-18 05:52:40	12.873	24.5398	22.3631	22.2934	22.5558	22.4506	21.8944	22.2759	22.4506	22.5206	22.4856	22.3806	22.2586	21.9981	22.4156	22.0673	7.83395	7.77015	7.8084	7.84675	7.7829	7.83395	7.7829	7.7829	7.82119	7.83395	7.85947	7.83395	7.79562	7.79562	7.75738	7.73191	7.79562	7.7829	7.79562	7.77015	7.70638	7.82119	7.73191	22.2411	21.9981	21.4823	21.7566
2008-03-18 05:53:00	12.873	24.5398	22.3631	22.3108	22.5558	22.4506	21.8944	22.2759	22.4506	22.5206	22.4856	22.3806	22.2411	21.9635	22.4156	22.0673	7.82119	7.77015	7.8084	7.83395	7.7829	7.82119	7.79562	7.79562	7.82119	7.82119	7.85947	7.84675	7.7829	7.79562	7.75738	7.71913	7.7829	7.79562	7.79562	7.77015	7.69365	7.82119	7.71913	22.2411	22.0327	21.4823	21.7566
2008-03-18 05:53:20	12.873	24.5398	22.3632	22.3108	22.5558	22.4507	21.9118	22.276	22.4507	22.5207	22.4856	22.3806	22.2585	21.9635	22.4156	22.0674	7.82122	7.77016	7.82122	7.83399	7.79568	7.83399	7.78294	7.79568	7.83399	7.83399	7.85953	7.83399	7.78294	7.78294	7.77016	7.73188	7.79568	7.78294	7.79568	7.77016	7.69368	7.82122	7.7192	22.2585	22.0328	21.4825	21.7567
2008-03-18 05:53:40	12.873	24.5398	22.3458	22.3109	22.5558	22.4506	21.9289	22.2586	22.4506	22.5032	22.4857	22.3807	22.276	21.9637	22.4157	22.0848	7.82123	7.77017	7.80842	7.84675	7.78291	7.82123	7.78291	7.7957	7.83398	7.82123	7.84675	7.84675	7.7957	7.78291	7.75742	7.73191	7.78291	7.78291	7.7957	7.78291	7.69369	7.80842	7.73191	22.2586	22.0328	21.4825	21.7567
2008-03-18 05:54:00	12.873	24.5398	22.3807	22.3109	22.5558	22.4506	21.9289	22.2586	22.4506	22.5207	22.4857	22.3807	22.276	21.9809	22.4157	22.1021	7.80842	7.75742	7.80842	7.83398	7.7957	7.82123	7.78291	7.7957	7.82123	7.82123	7.84675	7.84675	7.7957	7.78291	7.75742	7.73191	7.7957	7.7957	7.78291	7.77017	7.70645	7.80842	7.71917	22.276	22.0328	21.4825	21.7911
2008-03-18 05:54:20	12.873	24.5398	22.3807	22.3109	22.5559	22.4507	21.929	22.276	22.4507	22.5208	22.4682	22.3807	22.276	21.9809	22.4507	22.1022	7.82124	7.7702	7.80849	7.83403	7.78295	7.82124	7.78295	7.78295	7.83403	7.82124	7.84678	7.83403	7.79571	7.78295	7.7702	7.7192	7.78295	7.78295	7.78295	7.7702	7.70646	7.80849	7.7192	22.276	22.0329	21.5167	21.7912
2008-03-18 05:54:40	12.873	24.5398	22.3807	22.3109	22.5559	22.4507	21.929	22.276	22.4507	22.5208	22.4682	22.3807	22.2587	21.9809	22.4507	22.1022	7.82124	7.7702	7.79571	7.84678	7.78295	7.80849	7.7702	7.79571	7.82124	7.80849	7.84678	7.83403	7.78295	7.78295	7.74471	7.73193	7.78295	7.78295	7.79571	7.75744	7.6937	7.80849	7.7192	22.276	22.0329	21.5167	21.7912
2008-03-18 05:55:00	12.8731	24.5398	22.3458	22.3109	22.5559	22.4507	21.9291	22.276	22.4507	22.5208	22.4682	22.3807	22.2587	21.9982	22.4507	22.0849	7.82125	7.75746	7.8085	7.83405	7.78302	7.82125	7.78302	7.79574	7.82125	7.82125	7.84677	7.83405	7.79574	7.78302	7.75746	7.71923	7.78302	7.78302	7.78302	7.77023	7.70647	7.82125	7.70647	22.276	22.0328	21.5167	21.7912
2008-03-18 05:55:20	12.8731	24.5398	22.3808	22.311	22.5559	22.4507	21.9291	22.276	22.4507	22.5208	22.4507	22.3633	22.2413	21.9809	22.4507	22.1022	7.80849	7.77024	7.79577	7.83403	7.78299	7.82127	7.77024	7.79577	7.82127	7.82127	7.8596	7.83403	7.78299	7.78299	7.74469	7.73197	7.79577	7.78299	7.78299	7.77024	7.70644	7.80849	7.71921	22.276	22.0329	21.5167	21.7912
2008-03-18 05:55:40	12.8731	24.5398	22.3633	22.311	22.5559	22.4507	21.9291	22.276	22.4507	22.5208	22.4682	22.3808	22.276	21.9983	22.4507	22.1022	7.82127	7.77024	7.80849	7.83403	7.78299	7.82127	7.78299	7.79577	7.82127	7.80849	7.8468	7.83403	7.78299	7.78299	7.75747	7.73197	7.78299	7.78299	7.79577	7.75747	7.69373	7.80849	7.71921	22.276	22.0329	21.5167	21.7912
2008-03-18 05:56:00	12.8731	24.5104	22.3808	22.311	22.5559	22.4507	21.9291	22.2761	22.4507	22.5208	22.4507	22.3808	22.2761	21.9982	22.4507	22.1195	7.8085	7.75749	7.8085	7.83404	7.78302	7.82127	7.78302	7.78302	7.8085	7.82127	7.84684	7.83404	7.78302	7.79573	7.75749	7.71924	7.78302	7.78302	7.78302	7.77027	7.70649	7.8085	7.71924	22.311	22.0329	21.5509	21.8256
2008-03-18 05:56:20	12.8676	24.5104	22.3808	22.311	22.5559	22.4507	21.9291	22.2761	22.4507	22.5208	22.4507	22.3633	22.2761	21.9983	22.4507	22.1196	7.82128	7.75752	7.79581	7.83405	7.783	7.82128	7.77023	7.79581	7.82128	7.82128	7.84683	7.83405	7.783	7.783	7.74475	7.71923	7.783	7.783	7.783	7.75752	7.69374	7.82128	7.71923	22.311	22.0502	21.5509	21.8256
2008-03-18 05:56:40	12.8731	24.5104	22.3633	22.311	22.5559	22.4507	21.9636	22.2761	22.4507	22.5033	22.4507	22.3633	22.2761	21.9983	22.4507	22.1196	7.80853	7.75752	7.80853	7.83405	7.783	7.83405	7.783	7.783	7.82128	7.82128	7.84683	7.83405	7.783	7.783	7.75752	7.732	7.783	7.783	7.783	7.783	7.69374	7.80853	7.70647	22.2935	22.0676	21.568	21.8256
2008-03-18 05:57:00	12.8731	24.5104	22.3808	22.311	22.5558	22.4507	21.9464	22.2761	22.4507	22.5033	22.4507	22.3808	22.2761	22.0329	22.4507	22.1196	7.8085	7.75748	7.8085	7.8213	7.78299	7.8213	7.77022	7.79577	7.8085	7.8085	7.84686	7.84686	7.78299	7.78299	7.75748	7.73201	7.78299	7.78299	7.78299	7.75748	7.69375	7.8085	7.71927	22.311	22.0675	21.5509	21.8256
2008-03-18 05:57:20	12.8731	24.5398	22.3808	22.311	22.5558	22.4507	21.9637	22.2761	22.4507	22.4858	22.4682	22.3633	22.2761	22.0156	22.4507	22.1196	7.8085	7.75748	7.79577	7.83406	7.78299	7.8085	7.77022	7.78299	7.8213	7.8085	7.84686	7.83406	7.78299	7.78299	7.74473	7.71927	7.77022	7.78299	7.78299	7.75748	7.69375	7.8085	7.71927	22.311	22.0675	21.5851	21.8256
2008-03-18 05:57:40	12.8786	24.5104	22.3808	22.311	22.556	22.4507	21.9637	22.2762	22.4507	22.4858	22.4507	22.3808	22.2762	22.0329	22.4507	22.137	7.80856	7.7575	7.79573	7.83408	7.77025	7.80856	7.77025	7.78299	7.80856	7.80856	7.83408	7.83408	7.77025	7.78299	7.74477	7.71927	7.78299	7.78299	7.78299	7.77025	7.70648	7.80856	7.70648	22.311	22.0675	21.5852	21.8256
2008-03-18 05:58:00	12.8676	24.5104	22.3808	22.3285	22.5559	22.4508	21.9637	22.2761	22.4508	22.5033	22.4508	22.3808	22.2761	22.033	22.4508	22.1717	7.80854	7.77025	7.80854	7.82129	7.78302	7.82129	7.78302	7.78302	7.82129	7.80854	7.84682	7.82129	7.77025	7.78302	7.74477	7.71923	7.78302	7.78302	7.78302	7.77025	7.69379	7.80854	7.70654	22.311	22.0675	21.6194	21.8429
2008-03-18 05:58:20	12.8731	24.5104	22.3808	22.3459	22.5559	22.4508	21.9637	22.2936	22.4508	22.5033	22.4508	22.3808	22.2936	22.033	22.4508	22.1717	7.80854	7.7575	7.79576	7.83407	7.77025	7.82129	7.77025	7.78302	7.80854	7.80854	7.84682	7.83407	7.78302	7.77025	7.74477	7.73204	7.78302	7.78302	7.78302	7.77025	7.69379	7.79576	7.70654	22.311	22.0675	21.6194	21.8601
2008-03-18 05:58:40	12.8676	24.5104	22.3809	22.3459	22.556	22.4507	21.9637	22.2936	22.4507	22.5209	22.4507	22.3809	22.2936	22.0503	22.4507	22.1891	7.8213	7.75748	7.79578	7.8213	7.78303	7.80856	7.78303	7.78303	7.80856	7.80856	7.84681	7.83408	7.78303	7.77027	7.75748	7.70653	7.77027	7.78303	7.77027	7.75748	7.69377	7.79578	7.71928	22.311	22.1022	21.6366	21.8774
2008-03-18 05:59:00	12.8731	24.5104	22.3809	22.3459	22.556	22.4507	21.9637	22.311	22.4507	22.5034	22.4684	22.3809	22.311	22.0676	22.4858	22.2065	7.80856	7.75748	7.80856	7.83408	7.78303	7.80856	7.77027	7.78303	7.80856	7.80856	7.84681	7.8213	7.77027	7.78303	7.74475	7.71928	7.78303	7.78303	7.78303	7.75748	7.69377	7.79578	7.70653	22.3459	22.1022	21.6537	21.8946
2008-03-18 05:59:20	12.8731	24.5104	22.3809	22.3634	22.556	22.4507	21.9983	22.311	22.4507	22.5034	22.4684	22.3809	22.311	22.0676	22.4858	22.2239	7.80856	7.74475	7.79578	7.8213	7.78303	7.8213	7.78303	7.79578	7.80856	7.80856	7.83408	7.83408	7.78303	7.78303	7.74475	7.71928	7.77027	7.77027	7.78303	7.77027	7.69377	7.79578	7.70653	22.3459	22.1022	21.6881	21.8946
2008-03-18 05:59:40	12.8731	24.5104	22.3809	22.3809	22.556	22.4507	21.9983	22.311	22.4507	22.5034	22.4684	22.3809	22.311	22.0676	22.4858	22.2413	7.80856	7.75748	7.79578	7.83408	7.78303	7.80856	7.77027	7.78303	7.80856	7.80856	7.84681	7.8213	7.78303	7.78303	7.74475	7.71928	7.77027	7.78303	7.77027	7.77027	7.69377	7.79578	7.70653	22.3459	22.1022	21.6881	21.9119
2008-03-18 06:00:00	12.8731	24.5104	22.3809	22.3809	22.5384	22.4507	22.0156	22.311	22.4858	22.5209	22.4684	22.3809	22.311	22.1022	22.5209	22.2413	7.80856	7.75748	7.79578	7.8213	7.77027	7.80856	7.77027	7.78303	7.80856	7.80856	7.84681	7.8213	7.77027	7.78303	7.74475	7.71928	7.77027	7.77027	7.78303	7.75748	7.69377	7.80856	7.70653	22.3459	22.1022	21.7224	21.9292
2008-03-18 06:00:20	12.8676	24.5104	22.3983	22.3809	22.5384	22.4507	22.0329	22.3284	22.4858	22.5209	22.4684	22.3809	22.311	22.1022	22.5034	22.2587	7.79578	7.75748	7.79578	7.8213	7.78303	7.80856	7.77027	7.78303	7.80856	7.80856	7.83408	7.8213	7.77027	7.77027	7.74475	7.71928	7.78303	7.77027	7.78303	7.75748	7.69377	7.79578	7.70653	22.3809	22.1022	21.7568	21.9637
2008-03-18 06:00:40	12.8731	24.5104	22.4158	22.3983	22.556	22.4507	22.0329	22.3459	22.4858	22.5209	22.4858	22.3809	22.311	22.1022	22.5209	22.2761	7.79578	7.75748	7.79578	7.8213	7.78303	7.80856	7.78303	7.78303	7.80856	7.80856	7.83408	7.83408	7.77027	7.77027	7.74475	7.71928	7.77027	7.77027	7.77027	7.74475	7.68104	7.79578	7.70653	22.3809	22.137	21.7568	21.9637
2008-03-18 06:01:00	12.8677	24.5104	22.4158	22.3809	22.556	22.4507	22.0329	22.3459	22.4858	22.5209	22.4858	22.3809	22.311	22.1022	22.5209	22.2761	7.80856	7.74475	7.79578	7.8213	7.77027	7.80856	7.77027	7.77027	7.80856	7.80856	7.84681	7.83408	7.77027	7.77027	7.74475	7.71928	7.77027	7.77027	7.77027	7.74475	7.69377	7.79578	7.70653	22.3809	22.137	21.774	21.9637
2008-03-18 06:01:20	12.8731	24.5104	22.4158	22.4158	22.556	22.4507	22.0503	22.3459	22.4858	22.5209	22.4858	22.3983	22.3284	22.137	22.5209	22.2936	7.80856	7.74475	7.79578	7.8213	7.77027	7.80856	7.77027	7.77027	7.80856	7.80856	7.84681	7.83408	7.77027	7.77027	7.74475	7.71928	7.78303	7.77027	7.78303	7.74475	7.69377	7.79578	7.70653	22.3809	22.1544	21.7912	21.9637
2008-03-18 06:01:40	12.8731	24.5104	22.4158	22.4158	22.556	22.4507	22.0676	22.3459	22.4858	22.5209	22.4858	22.4158	22.3459	22.137	22.5384	22.311	7.80856	7.74475	7.79578	7.80856	7.77027	7.80856	7.77027	7.77027	7.80856	7.80856	7.83408	7.83408	7.77027	7.77027	7.73203	7.70653	7.77027	7.77027	7.78303	7.74475	7.66828	7.79578	7.69377	22.3983	22.1717	21.8256	21.9983
2008-03-18 06:02:00	12.8731	24.5104	22.4158	22.4158	22.556	22.4684	22.0676	22.3809	22.5034	22.5209	22.4858	22.3983	22.3459	22.1544	22.556	22.311	7.79578	7.74475	7.79578	7.8213	7.77027	7.80856	7.75748	7.77027	7.79578	7.79578	7.84681	7.8213	7.77027	7.77027	7.73203	7.70653	7.77027	7.77027	7.77027	7.75748	7.68104	7.79578	7.70653	22.3983	22.1717	21.8256	22.0329
2008-03-18 06:02:20	12.8677	24.5104	22.4333	22.4333	22.556	22.4684	22.0849	22.3809	22.5209	22.5209	22.4858	22.4158	22.3459	22.1717	22.556	22.311	7.79578	7.74475	7.78303	7.8213	7.75748	7.80856	7.75748	7.77027	7.80856	7.80856	7.83408	7.80856	7.77027	7.77027	7.73203	7.69377	7.77027	7.77027	7.77027	7.75748	7.68104	7.79578	7.69377	22.4158	22.1717	21.8601	22.0329
2008-03-18 06:02:40	12.8731	24.481	22.4333	22.4507	22.556	22.4858	22.1022	22.3809	22.5209	22.5209	22.4858	22.4158	22.3459	22.1717	22.556	22.3459	7.79578	7.75748	7.78303	7.80856	7.75748	7.80856	7.77027	7.77027	7.80856	7.80856	7.8213	7.80856	7.77027	7.77027	7.73203	7.70653	7.77027	7.77027	7.77027	7.74475	7.66828	7.78303	7.69377	22.4158	22.1717	21.8601	22.0329
2008-03-18 06:03:00	12.8731	24.481	22.4507	22.4507	22.556	22.4684	22.1022	22.3809	22.5209	22.5209	22.4858	22.4158	22.3634	22.1717	22.556	22.3459	7.80856	7.74475	7.78303	7.80856	7.77027	7.79578	7.75748	7.77027	7.79578	7.79578	7.83408	7.8213	7.77027	7.77027	7.73203	7.70653	7.77027	7.77027	7.77027	7.75748	7.68104	7.78303	7.69377	22.4333	22.2065	21.8946	22.0503
2008-03-18 06:03:20	12.8731	24.481	22.4507	22.4507	22.556	22.4858	22.1022	22.3809	22.5209	22.5209	22.5034	22.4158	22.3809	22.1891	22.591	22.3634	7.79578	7.74475	7.78303	7.80856	7.77027	7.79578	7.75748	7.77027	7.80856	7.79578	7.83408	7.8213	7.77027	7.75748	7.73203	7.70653	7.75748	7.77027	7.77027	7.74475	7.68104	7.78303	7.69377	22.4507	22.2065	21.8946	22.0676
2008-03-18 06:03:40	12.8731	24.481	22.4507	22.4507	22.556	22.4858	22.137	22.3809	22.5209	22.5209	22.5209	22.4333	22.3634	22.2065	22.591	22.3809	7.78303	7.73203	7.78303	7.80856	7.75748	7.79578	7.75748	7.75748	7.79578	7.79578	7.83408	7.8213	7.75748	7.75748	7.73203	7.70653	7.75748	7.75748	7.77027	7.74475	7.66828	7.79578	7.69377	22.4507	22.2065	21.9292	22.0676
2008-03-18 06:04:00	12.8731	24.481	22.4507	22.4858	22.556	22.4858	22.137	22.3809	22.5209	22.5209	22.5209	22.4333	22.3809	22.2065	22.591	22.3809	7.78303	7.74475	7.78303	7.80856	7.77027	7.79578	7.75748	7.77027	7.79578	7.80856	7.83408	7.80856	7.75748	7.75748	7.73203	7.70653	7.75748	7.75748	7.77027	7.73203	7.66828	7.78303	7.69377	22.4507	22.2065	21.9637	22.1022
2008-03-18 06:04:20	12.8731	24.481	22.4507	22.4858	22.556	22.4858	22.1717	22.4158	22.5209	22.5209	22.4858	22.4507	22.3809	22.2239	22.591	22.3809	7.79578	7.73203	7.78303	7.80856	7.75748	7.79578	7.75748	7.77027	7.80856	7.79578	7.83408	7.80856	7.75748	7.77027	7.71928	7.70653	7.75748	7.75748	7.77027	7.73203	7.68104	7.78303	7.69377	22.4507	22.2065	21.9637	22.1022
2008-03-18 06:04:40	12.8731	24.481	22.4507	22.4858	22.5735	22.4858	22.1717	22.4158	22.5209	22.5209	22.5209	22.4507	22.3809	22.2413	22.591	22.4158	7.79578	7.73203	7.78303	7.80856	7.77027	7.79578	7.75748	7.75748	7.78303	7.79578	7.8213	7.80856	7.75748	7.75748	7.73203	7.70653	7.75748	7.75748	7.77027	7.74475	7.66828	7.78303	7.69377	22.4507	22.2413	21.9637	22.1196
2008-03-18 06:05:00	12.8731	24.481	22.4684	22.4858	22.556	22.4858	22.1717	22.4158	22.5209	22.5209	22.5209	22.4507	22.3809	22.2413	22.591	22.4158	7.79578	7.73203	7.77027	7.80856	7.75748	7.79578	7.75748	7.77027	7.79578	7.79578	7.8213	7.80856	7.75748	7.75748	7.73203	7.69377	7.75748	7.75748	7.75748	7.73203	7.66828	7.78303	7.69377	22.4684	22.2413	21.9983	22.137
2008-03-18 06:05:20	12.8677	24.481	22.4684	22.5034	22.556	22.4858	22.1891	22.4158	22.5209	22.5209	22.5209	22.4507	22.3809	22.2413	22.591	22.4158	7.78303	7.73203	7.77027	7.80856	7.75748	7.79578	7.75748	7.77027	7.78303	7.78303	7.8213	7.80856	7.74475	7.74475	7.73203	7.69377	7.75748	7.77027	7.77027	7.74475	7.66828	7.78303	7.68104	22.4858	22.2413	21.9983	22.1544
2008-03-18 06:05:40	12.8731	24.481	22.4858	22.4858	22.556	22.4858	22.2065	22.4507	22.5209	22.5209	22.5209	22.4507	22.3809	22.2587	22.6086	22.4507	7.79578	7.73203	7.77027	7.80856	7.74475	7.79578	7.74475	7.75748	7.79578	7.79578	7.8213	7.80856	7.75748	7.75748	7.73203	7.69377	7.74475	7.75748	7.75748	7.73203	7.66828	7.78303	7.68104	22.4858	22.2413	22.0329	22.1717
2008-03-18 06:06:00	12.8731	24.481	22.4858	22.5209	22.556	22.5034	22.2065	22.4507	22.5384	22.556	22.5209	22.4507	22.3809	22.2761	22.6261	22.4507	7.78303	7.73203	7.77027	7.79578	7.74475	7.78303	7.75748	7.75748	7.79578	7.78303	7.8213	7.80856	7.74475	7.74475	7.71928	7.69377	7.75748	7.75748	7.75748	7.74475	7.66828	7.78303	7.68104	22.4858	22.2413	22.0329	22.1717
2008-03-18 06:06:20	12.8731	24.481	22.4858	22.5209	22.591	22.5209	22.2065	22.4507	22.556	22.556	22.5209	22.4507	22.3983	22.2761	22.6261	22.4507	7.78303	7.73203	7.78303	7.79578	7.74475	7.79578	7.74475	7.75748	7.79578	7.78303	7.8213	7.80856	7.75748	7.74475	7.73203	7.69377	7.75748	7.75748	7.75748	7.73203	7.65556	7.77027	7.68104	22.5209	22.2413	22.0503	22.1717
2008-03-18 06:06:40	12.8731	24.481	22.4858	22.5209	22.5735	22.5209	22.2413	22.4507	22.556	22.556	22.5209	22.4507	22.4158	22.2936	22.6261	22.4507	7.78303	7.73203	7.77027	7.80856	7.75748	7.78303	7.75748	7.75748	7.78303	7.78303	7.8213	7.79578	7.75748	7.74475	7.73203	7.68104	7.75748	7.75748	7.74475	7.73203	7.66828	7.78303	7.69377	22.5209	22.2413	22.0676	22.2065
2008-03-18 06:07:00	12.8677	24.481	22.5034	22.5209	22.591	22.5209	22.2413	22.4507	22.556	22.556	22.5209	22.4684	22.4158	22.311	22.6261	22.4858	7.78303	7.73203	7.77027	7.80856	7.75748	7.78303	7.75748	7.75748	7.78303	7.78303	7.8213	7.80856	7.74475	7.75748	7.71928	7.68104	7.75748	7.75748	7.75748	7.73203	7.65556	7.78303	7.68104	22.5209	22.2413	22.1022	22.2065
2008-03-18 06:07:20	12.8677	24.481	22.5209	22.5209	22.591	22.5209	22.2413	22.4507	22.556	22.556	22.5209	22.4858	22.4158	22.311	22.6261	22.4858	7.78303	7.71928	7.77027	7.79578	7.74475	7.78303	7.74475	7.74475	7.78303	7.78303	7.8213	7.80856	7.74475	7.75748	7.71928	7.69377	7.74475	7.74475	7.75748	7.73203	7.66828	7.78303	7.68104	22.5209	22.2761	22.1022	22.2413
2008-03-18 06:07:40	12.8677	24.481	22.5209	22.5209	22.591	22.5209	22.2413	22.4858	22.556	22.556	22.5209	22.4858	22.4158	22.311	22.6261	22.5034	7.78303	7.71928	7.75748	7.79578	7.75748	7.78303	7.74475	7.75748	7.78303	7.78303	7.80856	7.79578	7.74475	7.74475	7.71928	7.69377	7.74475	7.75748	7.74475	7.73203	7.66828	7.78303	7.68104	22.5209	22.2761	22.1022	22.2413
2008-03-18 06:08:00	12.8731	24.4516	22.5209	22.556	22.591	22.5209	22.2587	22.4858	22.591	22.556	22.5209	22.4858	22.4158	22.311	22.6261	22.5209	7.78303	7.73203	7.77027	7.79578	7.74475	7.79578	7.74475	7.75748	7.78303	7.78303	7.8213	7.80856	7.74475	7.75748	7.71928	7.69377	7.74475	7.74475	7.75748	7.73203	7.65556	7.77027	7.68104	22.5209	22.2761	22.137	22.2413
2008-03-18 06:08:20	12.8731	24.4516	22.5209	22.556	22.591	22.5209	22.2761	22.4858	22.5735	22.556	22.5209	22.4858	22.4158	22.3284	22.6614	22.5209	7.77027	7.71928	7.77027	7.79578	7.74475	7.78303	7.74475	7.75748	7.78303	7.78303	7.8213	7.80856	7.75748	7.74475	7.73203	7.68104	7.75748	7.75748	7.74475	7.73203	7.66828	7.77027	7.68104	22.5209	22.2761	22.137	22.2413
2008-03-18 06:08:40	12.8731	24.4516	22.5209	22.556	22.591	22.5209	22.2761	22.4858	22.591	22.591	22.5384	22.4858	22.4507	22.3459	22.6614	22.5209	7.78303	7.71928	7.77027	7.80856	7.73203	7.78303	7.74475	7.75748	7.78303	7.78303	7.8213	7.79578	7.74475	7.74475	7.71928	7.68104	7.75748	7.75748	7.75748	7.73203	7.65556	7.77027	7.68104	22.5209	22.2761	22.1544	22.2413
2008-03-18 06:09:00	12.8786	24.4516	22.5209	22.556	22.591	22.5209	22.2761	22.5209	22.591	22.591	22.5209	22.5034	22.4507	22.3459	22.6614	22.5384	7.77027	7.73203	7.77027	7.79578	7.74475	7.78303	7.74475	7.75748	7.78303	7.77027	7.80856	7.79578	7.74475	7.74475	7.71928	7.69377	7.75748	7.74475	7.75748	7.73203	7.66828	7.77027	7.68104	22.5209	22.311	22.1717	22.2761

## Sheet: Thermistoren
Cime Bianche												Stump ForaTec AG
Permafrostbohrung						Thermistoren
												Tel. +41 43 355 62 62
Automatische Messanlage						Periode: 18. März 2008 - 18. März 2008						e-mail: messtechnik@stump.ch
Genauigkeit Thermistoren ±0.1°C

## Sheet: Extenso_Logger_Luft
Cime Bianche												Stump ForaTec AG
Permafrostbohrung						Extensometer, Loggerstatus und Aussentemperatur
												Tel. +41 43 355 62 62
Automatische Messanlage						Periode: 18. März 2008 - 18. März 2008						e-mail: messtechnik@stump.ch
Genauigkeit Thermistoren ±0.1°C, Linearität Potentiometer ±0.1%
Loggertemperatur und -spannung sind im Loggerkasten gemessen.
