# Supplementary material for: Warming permafrost and active layer variability at Cime Bianche, Western European Alps
Source: Copernicus journal article supplement (doi:10.5194/tc-9-647-2015), 2015-04-08
Supplement: Supplementary file 1 [file tc-9-647-2015-supplement-cover-letter.pdf › tc-9-647-2015-supplement-cover-letter.pdf]

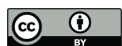

*Supplement of*

## **Warming permafrost and active layer variability at Cime Bianche, Western European Alps**

**P. Pogliotti et al.**

*Correspondence to:* P. Pogliotti (paolo.pogliotti@gmail.com)

- [tc-9-647-2015-supplement-cover-letter.pdf](#)
- [Cime\\_bianche\\_Daten\\_calibration.xls](#)
